# Supplementary material for: Natural-Killer-Derived Extracellular Vesicles: Immune Sensors and Interactors
Source: Front Immunol. 2020 Mar 13;11:262. doi: 10.3389/fimmu.2020.00262 (PMC7082405; doi:10.3389/fimmu.2020.00262)
Supplement: Supplementary file 1 [file Table_1.xlsx]

## Sheet: Suppl Table 1
Table S1 Proteins identified in natural killer cell-derived extracellular vesicles (NKEVs) and /or total cell extract: x marks the presence of the hit in the Exocarta or Vesiclepedia database.
	Accession	Description	MW [kDa]	Entrez Gene ID	Gene Symbol	Present in Exocarta	Present in Vesciclepedia	Identified in
1	O15439-1	multidrug resistance-associated protein 4	149.4	10257	ABCC4	x	x	MV Exo
2	P12821-1	Angiotensin-converting enzyme	149.6	1636	ACE	x	x	MV Exo
3	Q76LX8	A disintegrin and metalloproteinase with thrombospondin motifs 13	153.5	11093	ADAMTS13	x	x	MV Exo
4	P02765	Alpha-2-HS-glycoprotein	39.3	197	AHSG	x	x	MV Exo
5	P00352	Retinal dehydrogenase 1	54.8	216	ALDH1A1	x	x	MV Exo
6	O75891-1	Cytosolic 10-formyltetrahydrofolate dehydrogenase	98.8	10840	ALDH1L1	x	x	MV Exo
7	P05062	fructose-bisphosphate aldolase B	39.4	229	ALDOB	x	x	MV Exo
8	Q9Y5C1	Angiopoietin-related protein 3	53.6	27329	ANGPTL3	x	x	MV Exo
9	P16157	ankyrin-1	206.1	286	ANK1	x	x	MV Exo
10	P15144	aminopeptidase N	109.5	290	ANPEP	x	x	MV Exo
11	Q06481	Amyloid-like protein 2	86.9	334	APLP2	x	x	MV Exo
12	P02749	Beta-2-glycoprotein 1	38.3	350	APOH	x	x	MV Exo
13	O95445-1	apolipoprotein M	21.2	55937	APOM	x	x	MV Exo
14	P05067-1	Amyloid-beta A4 protein	86.9	351	APP	x	x	MV Exo
15	Q8N4T4-1	Rho guanine nucleotide exchange factor 39	38.3	84904	ARHGEF39	x		MV Exo
16	Q9BXN1	Asporin	43.4	54829	ASPN	x	x	MV Exo
17	P00966	Argininosuccinate synthase	46.5	445	ASS1	x	x	MV Exo
18	Q8NB49-1	Phospholipid-transporting ATPase IG	129.4	286410	ATP11C	x	x	MV Exo
19	P05026	Sodium/potassium-transporting ATPase subunit beta-1	35	481	ATP1B1	x	x	MV Exo
20	Q96GD4	Aurora kinase B	39.3	9212	AURKB		x	MV Exo
21	O43505	beta-1,4-glucuronyltransferase 1	47.1	11041	B3GNT1; B4GAT1			MV Exo
22	Q9HB09-1	Bcl-2-like protein 12	36.8	83596	BCL2L12	x	x	MV Exo
23	Q93088	Betaine--homocysteine S-methyltransferase 1	45	635	BHMT	x	x	MV Exo
24	P25440-1	Bromodomain-containing protein 2	88	6046	BRD2		x	MV Exo
25	Q06187	Tyrosine-protein kinase BTK	76.2	695	BTK	x	x	MV Exo
26	P10643	Complement component C7	93.5	730	C7	x	x	MV Exo
27	P02748	complement component C9	63.1	735	C9	x	x	MV Exo
28	P54289-4	Isoform 4 of Voltage-dependent calcium channel subunit alpha-2/delta-1	121.8	781	CACNA2D1	x	x	MV Exo
29	Q05682-1	Caldesmon	93.2	800	CALD1		x	MV Exo
30	P32248	C-C chemokine receptor type 7	42.8	1236	CCR7		x	MV Exo
31	P15391-1	B-lymphocyte antigen CD19	61.1	930	CD19	x	x	MV Exo
32	Q9NZQ7-1	Programmed cell death 1 ligand 1	33.3	29126	CD274	x	x	MV Exo
33	Q5ZPR3	CD276 antigen	57.2	80381	CD276	x	x	MV Exo
34	P16671	Platelet glycoprotein 4	53	948	CD36	x	x	MV Exo
35	P25942-1	Tumor necrosis factor receptor superfamily member 5	30.6	958	CD40	x	x	MV Exo
36	P42081	T-lymphocyte activation antigen CD86	37.7	942	CD86	x	x	MV Exo
37	P21926	CD9 antigen	25.4	928	CD9	x	x	MV Exo
38	P23141	Liver carboxylesterase 1	62.5	1066	CES1		x	MV Exo
39	P00751-1	Complement factor B	85.5	629	CFB	x	x	MV Exo
40	O15335	Chondroadherin	40.5	1101	CHAD			MV Exo
41	Q9Y3E7	Charged multivesicular body protein 3	25.1	51652; 100526767	CHMP3; RNF103-CHMP3			MV Exo
42	Q969X6	U3 small nucleolar RNA-associated protein 4 homolog	76.8	84916	CIRH1A; UTP4			MV Exo
43	O14578	Citron Rho-interacting kinase	231.3	11113	CIT	x	x	MV Exo
44	P12277	Creatine kinase B-type	42.6	1152	CKB	x	x	MV Exo
45	Q9Y240	C-type lectin domain family 11 member A	35.7	6320	CLEC11A	x	x	MV Exo
46	P10909-1	Clusterin	52.5	1191	CLU	x	x	MV Exo
47	Q96DG6	Carboxymethylenebutenolidase homolog	28	134147	CMBL	x	x	MV Exo
48	Q12860	Contactin-1	113.2	1272	CNTN1	x	x	MV Exo
49	P02452	Collagen alpha-1(I) chain	138.9	1277	COL1A1	x	x	MV Exo
50	P12109	Collagen alpha-1(VI) chain	108.5	1291	COL6A1	x	x	MV Exo
51	P12110	Collagen alpha-2(VI) chain	108.5	1292	COL6A2	x	x	MV Exo
52	P12111	Collagen alpha-3(VI) chain	343.5	1293	COL6A3	x	x	MV Exo
53	A6NMZ7-1	Collagen alpha-6(VI) chain	247	131873	COL6A6		x	MV Exo
54	Q9Y6Z7	Collectin-10	30.7	10584	COLEC10	x	x	MV Exo
55	P49747	Cartilage oligomeric matrix protein	82.8	1311	COMP	x	x	MV Exo
56	P00450	Ceruloplasmin	122.1	1356	CP	x	x	MV Exo
57	Q96IY4	Carboxypeptidase B2	48.4	1361	CPB2		x	MV Exo
58	P15169	Carboxypeptidase N catalytic chain	52.3	1369	CPN1		x	MV Exo
59	P17927	Complement receptor type 1	223.5	1378	CR1	x	x	MV Exo
60	P29279-1	Connective tissue growth factor	38.1	1490	CTGF	x	x	MV Exo
61	P04839	Cytochrome b-245 heavy chain	65.3	1536	CYBB	x	x	MV Exo
62	Q9Y4D1	Disheveled-associated activator of morphogenesis 1	123.4	23002	DAAM1	x	x	MV Exo
63	Q9UHI6	Probable ATP-dependent RNA helicase DDX20	92.2	11218	DDX20		x	MV Exo
64	Q6UWP2	Dehydrogenase/reductase SDR family member 11	28.3	79154	DHRS11		x	MV Exo
65	Q14574-1	Desmocollin-3	99.9	1825	DSC3	x	x	MV Exo
66	Q16610	Extracellular matrix protein 1	60.6	1893	ECM1	x	x	MV Exo
67	O43854-1	EGF-like repeat and discoidin I-like domain-containing protein 3	53.7	10085	EDIL3	x	x	MV Exo
68	Q9NVM1	Protein eva-1 homolog B	18.4	55194	EVA1B	x		MV Exo
69	Q16394	Exostosin-1	86.2	2131	EXT1	x	x	MV Exo
70	Q93063	exostosin-2	82.2	2132	EXT2	x	x	MV Exo
71	P00742	Coagulation factor X	54.7	2159	F10	x	x	MV Exo
72	P05160	Coagulation factor XIII B chain	75.5	2165	F13B		x	MV Exo
73	P00734	Prothrombin	70	2147	F2	x	x	MV Exo
74	P00740	Coagulation factor IX	51.7	2158	F9	x	x	MV Exo
75	Q9BYI3-1	Hyccin	57.6	84668	FAM126A		x	MV Exo
76	Q8IXL6-1	Extracellular serine/threonine protein kinase FAM20C	66.2	56975	FAM20C	x	x	MV Exo
77	Q12884-1	prolyl endopeptidase FAP	87.7	2191	FAP	x	x	MV Exo
78	Q14517	Protocadherin Fat 1	506	2195	FAT1	x	x	MV Exo
79	Q6V0I7-1	Protocadherin Fat 4	542.4	79633	FAT4	x	x	MV Exo
80	P23142	Fibulin-1	77.2	2192	FBLN1	x	x	MV Exo
81	P35555	Fibrillin-1	312	2200	FBN1	x	x	MV Exo
82	P11362	Fibroblast growth factor receptor 1	91.8	2260	FGFR1	x	x	MV Exo
83	Q13642-1	Isoform 1 of Four and a half LIM domains protein 1	31.9	2273	FHL1	x	x	MV Exo
84	Q06828	Fibromodulin	43.2	2331	FMOD	x	x	MV Exo
85	Q5TBA9	Protein furry homolog	338.7	10129	FRY		x	MV Exo
86	Q6P9A2	Polypeptide N-acetylgalactosaminyltransferase 18	69.5	374378	GALNT18; GALNTL4			MV Exo
87	Q9NWU2	Glucose-induced degradation protein 8 homolog	26.7	54994	GID8	x		MV Exo
88	P38405-3	Isoform 3 of Guanine nucleotide-binding protein G(olf) subunit alpha	20.5	2774	GNAL	x	x	MV Exo
89	P14770	Platelet glycoprotein IX	19	2815	GP9	x	x	MV Exo
90	Q9Y625	Glypican-6	62.7	10082	GPC6	x	x	MV Exo
91	P22352	Glutathione peroxidase 3	25.5	2878	GPX3	x	x	MV Exo
92	Q7Z429	Protein lifeguard 1	41.2	2907	GRINA		x	MV Exo
93	Q96QA5	gasdermin-A	49.3	284110	GSDMA	x	x	MV Exo
94	Q16772	Glutathione S-transferase A3	25.3	2940	GSTA3	x	x	MV Exo
95	Q14520-1	Hyaluronan-binding protein 2	62.6	3026	HABP2		x	MV Exo
96	P02100	Hemoglobin subunit epsilon	16.2	3046	HBE1	x	x	MV Exo
97	Q93099	Homogentisate 1,2-dioxygenase	49.9	3081	HGD	x	x	MV Exo
98	P52790	Hexokinase-3	99	3101	HK3		x	MV Exo
99	P30499	HLA class I histocompatibility antigen, Cw-1 alpha chain	40.9	3107	HLA-C	x	x	MV Exo
100	P00738	Haptoglobin	45.2	3240	HP	x	x	MV Exo
101	P32754-1	4-hydroxyphenylpyruvate dioxygenase	44.9	3242	HPD	x	x	MV Exo
102	P01112	GTPase HRas	21.3	3265	HRAS	x	x	MV Exo
103	P98160	Basement membrane-specific heparan sulfate proteoglycan core protein	468.5	3339	HSPG2	x	x	MV Exo
104	Q9Y6W8-1	Inducible T-cell costimulator	22.6	29851	ICOS		x	MV Exo
105	P35858	Insulin-like growth factor-binding protein complex acid labile subunit	66	3483	IGFALS	x	x	MV Exo
106	P01859	Immunoglobulin heavy constant gamma 2	35.9	3501	IGHG2	x	x	MV Exo
107	P01861	Immunoglobulin heavy constant gamma 4	35.9	3503	IGHG4	x	x	MV Exo
108	P0DOY2	immunoglobulin lambda constant 2	11.3	3538	IGLC2	x	x	MV Exo
109	Q86VI3	Ras GTPase-activating-like protein IQGAP3	184.6	128239	IQGAP3	x	x	MV Exo
110	Q9H0X4	Protein FAM234A	59.6	83986	ITFG3; FAM234A			MV Exo
111	P19827-1	Inter-alpha-trypsin inhibitor heavy chain H1	101.3	3697	ITIH1	x	x	MV Exo
112	Q06033-1	Inter-alpha-trypsin inhibitor heavy chain H3	99.8	3699	ITIH3	x	x	MV Exo
113	Q9H3F6-1	BTB/POZ domain-containing adapter for CUL3-mediated RhoA degradation protein 3	35.4	83892	KCTD10	x	x	MV Exo
114	Q9ULH0-1	Kinase D-interacting substrate of 220 kDa	196.4	57498	KIDINS220	x	x	MV Exo
115	Q15058	Kinesin-like protein KIF14	186.4	9928	KIF14	x	x	MV Exo
116	O95235	kinesin-like protein KIF20A	100.2	10112	KIF20A		x	MV Exo
117	Q02241-1	Kinesin-like protein KIF23	110	9493	KIF23	x	x	MV Exo
118	Q02241-3	Isoform 3 of Kinesin-like protein KIF23	77.7	9493	KIF23	x	x	MV Exo
119	Q6KB66	Keratin, type II cytoskeletal 80	50.5	144501	KRT80	x	x	MV Exo
120	Q14533	Keratin, type II cuticular Hb1	54.9	3887	KRT81		x	MV Exo
121	P07942	Laminin subunit beta-1	197.9	3912	LAMB1	x	x	MV Exo
122	P04180	phosphatidylcholine-sterol acyltransferase	49.5	3931	LCAT	x	x	MV Exo
123	Q8NES3-1	Beta-1,3-N-acetylglucosaminyltransferase lunatic fringe	41.7	3955	LFNG	x	x	MV Exo
124	Q3ZCW2	Galectin-related protein	19	29094	LGALSL	x	x	MV Exo
125	P06858	lipoprotein lipase	53.1	4023	LPL	x	x	MV Exo
126	Q07954	prolow-density lipoprotein receptor-related protein 1	504.3	4035	LRP1	x	x	MV Exo
127	P51884	Lumican	38.4	4060	LUM	x	x	MV Exo
128	P61626	lysozyme c	16.5	4069	LYZ	x	x	MV Exo
129	Q9BQ69	O-acetyl-ADP-ribose deacetylase MACROD1	35.5	28992	MACROD1		x	MV Exo
130	P43363	Melanoma-associated antigen 10	40.8	4109	MAGEA10		x	MV Exo
131	P61326-2	Isoform 2 of Protein mago nashi homolog	12.8	4116	MAGOH		x	MV Exo
132	P48740-2	Isoform 2 of Mannan-binding lectin serine protease 1	81.8	5648	MASP1	x	x	MV Exo
133	O00187-1	Mannan-binding lectin serine protease 2	75.7	10747	MASP2	x	x	MV Exo
134	P55083	Microfibril-associated glycoprotein 4	28.6	4239	MFAP4	x	x	MV Exo
135	Q08431	Lactadherin	43.1	4240	MFGE8	x	x	MV Exo
136	P08582-1	Melanotransferrin	80.2	4241	MFI2; MELTF			MV Exo
137	O43451	Maltase-glucoamylase, intestinal	209.7	8972	MGAM	x	x	MV Exo
138	Q8N4C8-1	Misshapen-like kinase 1	149.7	50488	MINK1	x	x	MV Exo
139	O95297-1	Myelin protein zero-like protein 1	29.1	9019	MPZL1	x	x	MV Exo
140	Q9UBG0	C-type mannose receptor 2	166.6	9902	MRC2	x	x	MV Exo
141	P24844-1	Myosin regulatory light polypeptide 9	19.8	10398	MYL9	x	x	MV Exo
142	P52848-1	Bifunctional heparan sulfate N-deacetylase/N-sulfotransferase 1	100.8	3340	NDST1	x	x	MV Exo
143	Q92859	neogenin	159.9	4756	NEO1	x	x	MV Exo
144	P14543-1	Nidogen-1	136.3	4811	NID1	x	x	MV Exo
145	O14786-1	Neuropilin-1	103.1	8829	NRP1	x	x	MV Exo
146	P20774	Mimecan	33.9	4969	OGN	x	x	MV Exo
147	Q9NRN5-1	Olfactomedin-like protein 3	46	56944	OLFML3	x	x	MV Exo
148	Q9UN70-1	Protocadherin gamma-C3	101	5098	PCDHGC3		x	MV Exo
149	Q15113	Procollagen C-endopeptidase enhancer 1	47.9	5118	PCOLCE	x	x	MV Exo
150	O76074	cGMP-specific 3',5'-cyclic phosphodiesterase	99.9	8654	PDE5A	x	x	MV Exo
151	Q5T2W1-1	Na(+)/H(+) exchange regulatory cofactor NHE-RF3	57.1	5174	PDZK1	x	x	MV Exo
152	Q96PD5	N-acetylmuramoyl-L-alanine amidase	62.2	114770	PGLYRP2	x	x	MV Exo
153	Q15063-1	Periostin	93.3	10631	POSTN	x	x	MV Exo
154	P0CG38	POTE ankyrin domain family member I	121.2	653269	POTEI	x	x	MV Exo
155	P45877	peptidyl-prolyl cis-trans isomerase C	22.7	5480	PPIC	x	x	MV Exo
156	Q13427	peptidyl-prolyl cis-trans isomerase g	88.6	9360	PPIG		x	MV Exo
157	Q96T49	Protein phosphatase 1 regulatory inhibitor subunit 16B	63.5	26051	PPP1R16B		x	MV Exo
158	P13727	Bone marrow proteoglycan	25.2	5553	PRG2		x	MV Exo
159	P28074-1	proteasome subunit beta type-5	28.5	5693	PSMB5	x	x	MV Exo
160	Q9P2B2	prostaglandin F2 receptor negative regulator	98.5	5738	PTGFRN	x	x	MV Exo
161	Q13308-1	Inactive tyrosine-protein kinase 7	118.3	5754	PTK7	x	x	MV Exo
162	P23468-1	Receptor-type tyrosine-protein phosphatase delta	214.6	5789	PTPRD	x	x	MV Exo
163	Q92626	peroxidasin homolog	165.2	7837	PXDN	x	x	MV Exo
164	P06737-1	Glycogen phosphorylase, liver form	97.1	5836	PYGL	x	x	MV Exo
165	O00391	Sulfhydryl oxidase 1	82.5	5768	QSOX1	x	x	MV Exo
166	P78509	Reelin	388.1	5649	RELN	x	x	MV Exo
167	Q15669	Rho-related GTP-binding protein RhoH	21.3	399	RHOH		x	MV Exo
168	Q969X0	RILP-like protein 2	24	196383	RILPL2		x	MV Exo
169	Q9H871-1	Protein RMD5 homolog A	44	64795	RMND5A	x	x	MV Exo
170	Q6P5R6	60S ribosomal protein L22-like 1	14.6	200916	RPL22L1	x	x	MV Exo
171	P01009-1	alpha-1-antitrypsin	46.7	5265	SERPINA1	x	x	MV Exo
172	P05543	thyroxine-binding globulin	46.3	6906	SERPINA7	x	x	MV Exo
173	P05546	Heparin cofactor 2	57	3053	SERPIND1	x	x	MV Exo
174	P36955	Pigment epithelium-derived factor	46.3	5176	SERPINF1	x	x	MV Exo
175	P08697-1	Alpha-2-antiplasmin	54.5	5345	SERPINF2	x	x	MV Exo
176	P05155	Plasma protease C1 inhibitor	55.1	710	SERPING1	x	x	MV Exo
177	O14796-1	SH2 domain-containing protein 1B	15.3	117157	SH2D1B			MV Exo
178	Q13239	SRC-like-adapter	31.1	6503	SLA			MV Exo
179	P41440	Folate transporter 1	64.8	6573	SLC19A1	x	x	MV Exo
180	P02730	Band 3 anion transport protein	101.7	6521	SLC4A1	x	x	MV Exo
181	Q9Y289	Sodium-dependent multivitamin transporter	68.6	8884	SLC5A6	x	x	MV Exo
182	Q14515	SPARC-like protein 1	75.2	8404	SPARCL1		x	MV Exo
183	P02549-1	spectrin alpha chain, erythrocytic 1	279.8	6708	SPTA1		x	MV Exo
184	O15020	Spectrin beta chain, non-erythrocytic 2	271.2	6712	SPTBN2	x	x	MV Exo
185	P12931	Proto-oncogene tyrosine-protein kinase Src	59.8	6714	SRC	x	x	MV Exo
186	Q9UNE7-1	E3 ubiquitin-protein ligase CHIP	34.8	10273	STUB1	x	x	MV Exo
187	Q15582	Transforming growth factor-beta-induced protein ig-h3	74.6	7045	TGFBI	x	x	MV Exo
188	P22735	Protein-glutamine gamma-glutamyltransferase K	89.7	7051	TGM1	x	x	MV Exo
189	P49746	Thrombospondin-3	104.1	7059	THBS3		x	MV Exo
190	P35443	Thrombospondin-4	105.8	7060	THBS4	x	x	MV Exo
191	Q96FV9-1	THO complex subunit 1	75.6	9984	THOC1	x	x	MV Exo
192	Q13769	THO complex subunit 5 homolog	78.5	8563	THOC5	x	x	MV Exo
193	Q86W42	THO complex subunit 6 homolog	37.5	79228	THOC6	x	x	MV Exo
194	Q6I9Y2	THO complex subunit 7 homolog	23.7	80145	THOC7	x	x	MV Exo
195	O95807	transmembrane protein 50A	17.4	23585	TMEM50A	x	x	MV Exo
196	P21580	Tumor necrosis factor alpha-induced protein 3	89.6	7128	TNFAIP3	x	x	MV Exo
197	P50591-1	Tumor necrosis factor ligand superfamily member 10	32.5	8743	TNFSF10	x	x	MV Exo
198	Q07912-1	Activated CDC42 kinase 1	114.5	10188	TNK2		x	MV Exo
199	Q16473	Putative tenascin-XA	33.7	7146	TNXA		x	MV Exo
200	Q12933	TNF receptor-associated factor 2	55.8	7186	TRAF2		x	MV Exo
201	P01850	T-cell receptor beta-1 chain C region	19.9	28639	TRBC1			MV Exo
202	A0A5B9	T-cell receptor beta-2 chain C region	20	28638	TRBC2			MV Exo
203	Q86UF1	Tetraspanin-33	31.5	340348	TSPAN33	x	x	MV Exo
204	O14817	Tetraspanin-4	26.1	7106	TSPAN4	x	x	MV Exo
205	P62079	Tetraspanin-5	30.3	10098	TSPAN5		x	MV Exo
206	Q9H4B7	tubulin beta-1 chain	50.3	81027	TUBB1	x	x	MV Exo
207	Q8TED0	U3 small nucleolar RNA-associated protein 15 homolog	58.4	84135	UTP15		x	MV Exo
208	P19320-1	Vascular cell adhesion protein 1	81.2	7412	VCAM1		x	MV Exo
209	O95498-1	Vascular non-inflammatory molecule 2	58.5	8875	VNN2		x	MV Exo
210	Q9UBH6	Xenotropic and polytropic retrovirus receptor 1	81.5	9213	XPR1	x	x	MV Exo
211	Q9C0B5	Palmitoyltransferase ZDHHC5	77.5	25921	ZDHHC5	x	x	MV Exo
212	Q9NP58	ATP-binding cassette sub-family B member 6, mitochondrial	93.8	10058	ABCB6	x	x	Exo
213	P22303-1	Acetylcholinesterase	67.8	43	ACHE		x	Exo
214	Q9NR19-1	Acetyl-coenzyme A synthetase, cytoplasmic	78.5	55902	ACSS2	x	x	Exo
215	P00568	Adenylate kinase isoenzyme 1	21.6	203	AK1	x	x	Exo
216	C9JRZ8	Aldo-keto reductase family 1 member B15	36.5	441282	AKR1B15		x	Exo
217	P51857	3-oxo-5-beta-steroid 4-dehydrogenase	37.4	6718	AKR1D1		x	Exo
218	Q9H2A2-1	aldehyde dehydrogenase family 8 member A1	53.4	64577	ALDH8A1	x	x	Exo
219	P04746	Pancreatic alpha-amylase	57.7	279	AMY2A	x	x	Exo
220	Q8NI99	Angiopoietin-related protein 6	51.7	83854	ANGPTL6		x	Exo
221	Q8N5I2	arrestin domain-containing protein 1	46	92714	ARRDC1	x	x	Exo
222	Q93050-1	Isoform 2 of V-type proton ATPase 116 kDa subunit a isoform 1	95.7	535	ATP6V0A1	x	x	Exo
223	O75366-1	Advillin	92	10677	AVIL		x	Exo
224	P21810	biglycan	41.6	633	BGN	x	x	Exo
225	Q9H2M3-1	S-methylmethionine--homocysteine S-methyltransferase BHMT2	40.3	23743	BHMT2	x	x	Exo
226	Q7Z6A9	B- and T-lymphocyte attenuator	32.8	151888	BTLA		x	Exo
227	P00736	Complement C1r subcomponent	80.1	715	C1R	x	x	Exo
228	P06681-1	complement C2	83.2	717	C2		x	Exo
229	P13671	Complement component c6	104.7	729	C6	x	x	Exo
230	P07357	Complement component C8 alpha chain	65.1	731	C8A	x	x	Exo
231	P07358	Complement component C8 beta chain	67	732	C8B		x	Exo
232	O15484	calpain-5	73.1	726	CAPN5	x	x	Exo
233	P29965	CD40 ligand	29.3	959	CD40LG	x	x	Exo
234	P06732	Creatine kinase M-type	43.1	1158	CKM		x	Exo
235	P39059	Collagen alpha-1(XV) chain	141.6	1306	COL15A1	x	x	Exo
236	P20908	Collagen alpha-1(V) chain	183.4	1289	COL5A1	x	x	Exo
237	Q96FN4	Copine-2	61.2	221184	CPNE2	x	x	Exo
238	P31327-1	Carbamoyl-phosphate synthase [ammonia], mitochondrial	164.8	1373	CPS1	x	x	Exo
239	Q9Y600	Cysteine sulfinic acid decarboxylase	55	51380	CSAD		x	Exo
240	Q9HCP0-1	Casein kinase I isoform gamma-1	48.5	53944	CSNK1G1	x	x	Exo
241	Q9Y6M4-1	Casein kinase I isoform gamma-3	51.4	1456	CSNK1G3	x	x	Exo
242	Q9H7Y0-1	Deleted in autism-related protein 1	48.5	79742	CXorf36			Exo
243	P30046	D-dopachrome decarboxylase	12.7	1652	DDT	x	x	Exo
244	Q9UQ16	Dynamin-3	97.7	26052	DNM3	x	x	Exo
245	Q96FJ2	Dynein light chain 2, cytoplasmic	10.3	140735	DYNLL2	x	x	Exo
246	Q9NZN4	EH domain-containing protein 2	61.1	30846	EHD2	x	x	Exo
247	Q9UHX3	Adhesion G protein-coupled receptor E2	90.4	30817	EMR2; ADGRE2			Exo
248	P34913-1	Bifunctional epoxide hydrolase 2	62.6	2053	EPHX2	x	x	Exo
249	P58107	epiplakin	555.3	83481	EPPK1	x	x	Exo
250	P84090	Enhancer of rudimentary homolog	12.3	2079	ERH	x	x	Exo
251	Q96RI0	Proteinase-activated receptor 4	41.1	9002	F2RL3	x	x	Exo
252	P00451	Coagulation factor VIII	266.8	2157	F8	x	x	Exo
253	P23142-4	Isoform C of Fibulin-1	74.4	2192	FBLN1	x	x	Exo
254	P16591-1	tyrosine-protein kinase Fer	94.6	2241	FER		x	Exo
255	Q96AC1	Fermitin family homolog 2	77.8	10979	FERMT2	x	x	Exo
256	Q08830	Fibrinogen-like protein 1	36.4	2267	FGL1		x	Exo
257	P02751-15	Isoform 15 of Fibronectin	272.2	2335	FN1	x	x	Exo
258	O95954-1	formimidoyltransferase-cyclodeaminase	58.9	10841	FTCD	x	x	Exo
259	P29992	guanine nucleotide-binding protein subunit alpha-11	42.1	2767	GNA11	x	x	Exo
260	P21695-1	Glycerol-3-phosphate dehydrogenase [NAD(+)], cytoplasmic	37.5	2819	GPD1	x	x	Exo
261	P51674	Neuronal membrane glycoprotein M6-a	31.2	2823	GPM6A	x	x	Exo
262	P46439	Glutathione S-transferase Mu 5	25.7	2949	GSTM5	x	x	Exo
263	Q9Y4D8-5	Isoform 5 of Probable E3 ubiquitin-protein ligase HECTD4	145	283450	HECTD4	x		Exo
264	Q9BQS7	Hephaestin	130.4	9843	HEPH	x	x	Exo
265	P30481	HLA class I histocompatibility antigen, B-44 alpha chain	40.5	3106	HLA-B	x	x	Exo
266	Q07000	HLA class I histocompatibility antigen, Cw-15 alpha chain	40.8	3107	HLA-C	x	x	Exo
267	Q29960	HLA class I histocompatibility antigen, Cw-16 alpha chain	40.7	3107	HLA-C	x	x	Exo
268	Q96RW7-1	Hemicentin-1	613	83872	HMCN1	x	x	Exo
269	P02790	Hemopexin	51.6	3263	HPX	x	x	Exo
270	Q92743	Serine protease HTRA1	51.3	5654	HTRA1	x	x	Exo
271	P13164	Interferon-induced transmembrane protein 1	14	8519	IFITM1	x	x	Exo
272	Q01629	Interferon-induced transmembrane protein 2	14.6	10581	IFITM2	x	x	Exo
273	Q01628	Interferon-induced transmembrane protein 3	14.6	10410	IFITM3	x	x	Exo
274	P01860	Immunoglobulin heavy constant gamma 3	41.3	3502	IGHG3	x	x	Exo
275	P01591	Immunoglobulin J chain	18.1	3512	IGJ; JCHAIN			Exo
276	B9A064-1	Immunoglobulin lambda-like polypeptide 5	23	100423062	IGLL5	x	x	Exo
277	Q96CX2	BTB/POZ domain-containing protein KCTD12	35.7	115207	KCTD12	x	x	Exo
278	P43627	Killer cell immunoglobulin-like receptor 2DL2	38.4	3803	KIR2DL2			Exo
279	P43628-1	Killer cell immunoglobulin-like receptor 2DL3	37.9	3804	KIR2DL3			Exo
280	P78386	Keratin, type II cuticular Hb5	55.8	3891	KRT85		x	Exo
281	Q7Z4I7-1	LIM and senescent cell antigen-like-containing domain protein 2	38.9	55679	LIMS2	x	x	Exo
282	Q9Y333	U6 snRNA-associated Sm-like protein LSm2	10.8	57819	LSM2	x	x	Exo
283	Q86X29	Lipolysis-stimulated lipoprotein receptor	71.4	51599	LSR	x	x	Exo
284	Q00266	S-adenosylmethionine synthase isoform type-1	43.6	4143	MAT1A	x	x	Exo
285	Q16819	Meprin A subunit alpha	84.4	4224	MEP1A	x	x	Exo
286	Q99542	Matrix metalloproteinase-19	57.3	4327	MMP19		x	Exo
287	P26927	Hepatocyte growth factor-like protein	80.3	4485	MST1	x	x	Exo
288	Q8NFP9-1	Neurobeachin	327.6	26960	NBEA		x	Exo
289	O43639	Cytoplasmic protein NCK2	42.9	8440	NCK2	x	x	Exo
290	Q9Y2A7-1	Nck-associated protein 1	128.7	10787	NCKAP1	x	x	Exo
291	P55769	NHP2-like protein 1	14.2	4809	NHP2L1; SNU13			Exo
292	Q14112-1	Nidogen-2	151.2	22795	NID2	x	x	Exo
293	O60462-1	Neuropilin-2	104.8	8828	NRP2	x	x	Exo
294	P61970	nuclear transport factor 2	14.5	10204	NUTF2	x	x	Exo
295	Q8WWZ8-1	Oncoprotein-induced transcript 3 protein	60	170392	OIT3	x	x	Exo
296	P00439	phenylalanine-4-hydroxylase	51.8	5053	PAH	x	x	Exo
297	Q9NVD7	alpha-parvin	42.2	55742	PARVA	x	x	Exo
298	P30039	Phenazine biosynthesis-like domain-containing protein	31.8	64081	PBLD	x	x	Exo
299	P35080-2	Isoform IIb of Profilin-2	15.1	5217	PFN2	x	x	Exo
300	Q86WI1	Fibrocystin-L	465.4	93035	PKHD1L1	x	x	Exo
301	Q96CS7-1	Pleckstrin homology domain-containing family B member 2	24.7	55041	PLEKHB2	x	x	Exo
302	P27169	Serum paraoxonase/arylesterase 1	39.7	5444	PON1	x	x	Exo
303	P31323	cAMP-dependent protein kinase type II-beta regulatory subunit	46.3	5577	PRKAR2B	x	x	Exo
304	P04070	Vitamin K-dependent protein C	52	5624	PROC		x	Exo
305	Q9NVN3-1	Isoform 1 of Synembryn-B	60.8	55188	RIC8B	x	x	Exo
306	P63173	60s ribosomal protein l38	8.2	6169	RPL38	x	x	Exo
307	P05387	60S acidic ribosomal protein P2	11.7	6181	RPLP2	x	x	Exo
308	O15027-1	Protein transport protein Sec16A	233.4	9919	SEC16A	x	x	Exo
309	Q13228	Selenium-binding protein 1	52.4	8991	SELENBP1	x	x	Exo
310	Q99719-1	Septin-5	42.8	5413	SEPT5	x		Exo
311	O43556-1	Epsilon-sarcoglycan	49.8	8910	SGCE		x	Exo
312	Q8TDB8-1	Solute carrier family 2, facilitated glucose transporter member 14	56.3	144195	SLC2A14	x	x	Exo
313	P11277	Spectrin beta chain, erythrocytic	246.3	6710	SPTB	x	x	Exo
314	Q658P3-1	Metalloreductase STEAP3	54.6	55240	STEAP3	x	x	Exo
315	P32856	Syntaxin-2	33.3	2054	STX2	x	x	Exo
316	P49888	Estrogen sulfotransferase	35.1	6783	SULT1E1		x	Exo
317	Q96L08	Sushi domain-containing protein 3	27.1	203328	SUSD3	x	x	Exo
318	Q96C24	Synaptotagmin-like protein 4	76	94121	SYTL4	x	x	Exo
319	Q15369-1	elongin-C	12.5	6921	TCEB1; ELOC			Exo
320	Q9UP52	Transferrin receptor protein 2	88.7	7036	TFR2		x	Exo
321	O43294-1	Transforming growth factor beta-1-induced transcript 1 protein	49.8	7041	TGFB1I1		x	Exo
322	Q03167	Transforming growth factor beta receptor type 3	93.4	7049	TGFBR3	x	x	Exo
323	P35442	Thrombospondin-2	129.9	7058	THBS2	x	x	Exo
324	P35590	Tyrosine-protein kinase receptor Tie-1	125	7075	TIE1		x	Exo
325	P35625	Metalloproteinase inhibitor 3	24.1	7078	TIMP3	x	x	Exo
326	P24821	Tenascin	240.7	3371	TNC	x	x	Exo
327	P19438-1	Tumor necrosis factor receptor superfamily member 1A	50.5	7132	TNFRSF1A	x	x	Exo
328	P22105	tenascin-X	457.9	7148	TNXB		x	Exo
329	Q9BRA2	Thioredoxin domain-containing protein 17	13.9	84817	TXNDC17	x	x	Exo
330	Q96N76	urocanate hydratase	74.8	131669	UROC1		x	Exo
331	Q15836	Vesicle-associated membrane protein 3	11.3	9341	VAMP3	x	x	Exo
332	O95183	vesicle-associated membrane protein 5	12.8	10791	VAMP5	x	x	Exo
333	Q9Y3S1-1	Serine/threonine-protein kinase WNK2	242.5	65268	WNK2		x	Exo
334	Q9H0M0-1	NEDD4-like E3 ubiquitin-protein ligase WWP1	105.1	11059	WWP1	x	x	Exo
335	O75191	xylulose kinase	58.3	9942	XYLB	x	x	Exo
336	Q9H1B5	Xylosyltransferase 2	96.7	64132	XYLT2		x	Exo
337	Q04828	aldo-keto reductase family 1 member C1	36.8	1645	AKR1C1	x	x	MV
338	P18054	Arachidonate 12-lipoxygenase, 12S-type	75.6	239	ALOX12	x	x	MV
339	Q9NQW6	Anillin	124.1	54443	ANLN	x	x	MV
340	Q96AK3	DNA dC->dU-editing enzyme APOBEC-3D	46.6	140564	APOBEC3D		x	MV
341	Q9NP55	BPI fold-containing family A member 1	26.7	51297	BPIFA1	x	x	MV
342	Q53HL2	Borealin	31.3	55143	CDCA8	x	x	MV
343	Q02224	Centromere-associated protein E	316.2	1062	CENPE	x	x	MV
344	O14578-3	Isoform 3 of Citron Rho-interacting kinase	176.9	11113	CIT	x	x	MV
345	Q9Y6C2	EMILIN-1	106.6	11117	EMILIN1	x	x	MV
346	P17813	Endoglin	70.5	2022	ENG	x	x	MV
347	Q5R3K3	Protein FAM26F	34.4	441168	FAM26F; CALHM6			MV
348	Q658Y4	Protein FAM91A1	93.9	157769	FAM91A1	x	x	MV
349	Q9Y5Y0	Feline leukemia virus subgroup C receptor-related protein 1	59.8	28982	FLVCR1	x	x	MV
350	Q9Y3E1	Hepatoma-derived growth factor-related protein 3	22.6	50810	HDGFRP3; HDGFL3			MV
351	Q02539	Histone H1.1	21.8	3024	HIST1H1A	x	x	MV
352	O95757	Heat shock 70 kDa protein 4L	94.5	22824	HSPA4L	x	x	MV
353	P14902	Indoleamine 2,3-dioxygenase 1	45.3	3620	IDO1		x	MV
354	Q12894	Interferon-related developmental regulator 2	54.8	7866	IFRD2		x	MV
355	Q9NQS7	Inner centromere protein	105.4	3619	INCENP		x	MV
356	P06756	Integrin alpha-V	116	3685	ITGAV	x	x	MV
357	Q96Q89-1	Kinesin-like protein KIF20B	210.5	9585	KIF20B		x	MV
358	Q7Z3Z0	Keratin, type I cytoskeletal 25	49.3	147183	KRT25	x	x	MV
359	P31025	Lipocalin-1	19.2	3933	LCN1	x	x	MV
360	Q8IWT6	volume-regulated anion channel subunit LRRC8A	94.1	56262	LRRC8A	x	x	MV
361	Q14766-1	Latent-transforming growth factor beta-binding protein 1	186.7	4052	LTBP1	x	x	MV
362	Q8N653	Leucine-zipper-like transcriptional regulator 1	94.7	8216	LZTR1	x	x	MV
363	Q6IN84-1	rRNA methyltransferase 1, mitochondrial	38.6	79922	MRM1		x	MV
364	P12883	Myosin-7	223	4625	MYH7	x	x	MV
365	Q9ULB1-1	Neurexin-1	161.8	9378	NRXN1		x	MV
366	P53350	Serine/threonine-protein kinase PLK1	68.2	5347	PLK1	x	x	MV
367	Q96SB3	Neurabin-2	89.1	84687	PPP1R9B		x	MV
368	Q05655	protein kinase C delta type	77.5	5580	PRKCD	x	x	MV
369	P23219	Prostaglandin G/H synthase 1	68.6	5742	PTGS1	x	x	MV
370	Q13636	ras-related protein rab-31	21.6	11031	RAB31		x	MV
371	P22090	40S ribosomal protein S4, Y isoform 1	29.4	6192	RPS4Y1	x	x	MV
372	Q9NQC3-3	Isoform 3 of Reticulon-4	22.4	57142	RTN4	x	x	MV
373	O95810	caveolae-associated protein 2	47.1	8436	SDPR; CAVIN2			MV
374	P16109	P-selectin	90.8	6403	SELP	x	x	MV
375	Q8TBC3	SH3KBP1-binding protein 1	76.3	92799	SHKBP1		x	MV
376	Q9UGH3	Solute carrier family 23 member 2	70.3	9962	SLC23A2	x	x	MV
377	P53794	sodium/myo-inositol cotransporter	79.6	6526	SLC5A3	x	x	MV
378	Q96BD0	solute carrier organic anion transporter family member 4A1	77.1	28231	SLCO4A1	x	x	MV
379	Q9Y365	START domain-containing protein 10	33	10809	STARD10		x	MV
380	P21980	Protein-glutamine gamma-glutamyltransferase 2	77.3	7052	TGM2	x	x	MV
381	P09493-1	Tropomyosin alpha-1 chain	32.7	7168	TPM1	x	x	MV
382	P09493-5	Isoform 5 of Tropomyosin alpha-1 chain	28.4	7168	TPM1	x	x	MV
383	Q13114-1	TNF receptor-associated factor 3	64.4	7187	TRAF3	x	x	MV
384	Q712K3	Ubiquitin-conjugating enzyme E2 R2	27.1	54926	UBE2R2	x	x	MV
385	Q9NQZ2	Something about silencing protein 10	54.5	57050	UTP3		x	MV
386	P04275	Von Willebrand factor	309.1	7450	VWF	x	x	MV
387	Q96GS6-1	Protein ABHD17A	34	81926	ABHD17A; FAM108A1			Tot Ext Exo
388	Q9P1F3	Costars family protein ABRACL	9.1	58527	ABRACL		x	Tot Ext Exo
389	P78325-1	Disintegrin and metalloproteinase domain-containing protein 8	88.7	101	ADAM8		x	Tot Ext Exo
390	P49419	Alpha-aminoadipic semialdehyde dehydrogenase	58.5	501	ALDH7A1	x	x	Tot Ext Exo
391	Q86V81	THO complex subunit 4	26.9	10189	ALYREF	x	x	Tot Ext Exo
392	Q9Y303	N-acetylglucosamine-6-phosphate deacetylase	43.7	51005	AMDHD2		x	Tot Ext Exo
393	Q5TG30	Rho GTPase-activating protein 40	68.9	343578	ARHGAP40			Tot Ext Exo
394	Q9NXU5	ADP-ribosylation factor-like protein 15	22.9	54622	ARL15	x	x	Tot Ext Exo
395	P98194-1	Calcium-transporting ATPase type 2C member 1	100.5	27032	ATP2C1	x	x	Tot Ext Exo
396	O75964	ATP synthase subunit g, mitochondrial	11.4	10632	ATP5L	x	x	Tot Ext Exo
397	O75882-1	Attractin	158.4	8455	ATRN	x	x	Tot Ext Exo
398	P61769	Beta-2-microglobulin	13.7	567	B2M	x	x	Tot Ext Exo
399	Q9UL15-1	BAG family molecular chaperone regulator 5	51.2	9529	BAG5	x	x	Tot Ext Exo
400	Q9NR09	Baculoviral IAP repeat-containing protein 6	529.9	57448	BIRC6	x	x	Tot Ext Exo
401	Q9H3H3	UPF0696 protein C11orf68	27.3	83638	C11orf68		x	Tot Ext Exo
402	Q8N357	Solute carrier family 35 member F6	40.2	54978	C2orf18; SLC35F6			Tot Ext Exo
403	Q9UKZ1	CCR4-NOT transcription complex subunit 11	55.2	55571	C2orf29; CNOT11			Tot Ext Exo
404	P42574	Caspase-3	31.6	836	CASP3	x	x	Tot Ext Exo
405	P55212	Caspase-6	33.3	839	CASP6	x	x	Tot Ext Exo
406	Q13951-2	Isoform 2 of Core-binding factor subunit beta	22	865	CBFB		x	Tot Ext Exo
407	P60953-1	Isoform 1 of Cell division control protein 42 homolog	21.3	998	CDC42	x	x	Tot Ext Exo
408	Q5VT25-1	Serine/threonine-protein kinase MRCK alpha	197.2	8476	CDC42BPA	x	x	Tot Ext Exo
409	Q9Y281-1	Cofilin-2	18.7	1073	CFL2	x	x	Tot Ext Exo
410	Q8N5K1	CDGSH iron-sulfur domain-containing protein 2	15.3	493856	CISD2	x	x	Tot Ext Exo
411	Q14746	Conserved oligomeric Golgi complex subunit 2	83.2	22796	COG2	x	x	Tot Ext Exo
412	P46108-1	Adapter molecule crk	33.8	1398	CRK	x	x	Tot Ext Exo
413	Q9UBG3	Cornulin	53.5	49860	CRNN	x	x	Tot Ext Exo
414	P07858	Cathepsin B	37.8	1508	CTSB	x	x	Tot Ext Exo
415	O60888-1	Protein CutA	19.1	51596	CUTA	x	x	Tot Ext Exo
416	Q9BVG4	Protein PBDC1	26	51260	CXorf26; PBDC1			Tot Ext Exo
417	Q8TB03	Uncharacterized protein CXorf38	36.6	159013	CXorf38	x	x	Tot Ext Exo
418	P99999	cytochrome c	11.7	54205	CYCS		x	Tot Ext Exo
419	Q14118	Dystroglycan	97.4	1605	DAG1	x	x	Tot Ext Exo
420	O00399	Dynactin subunit 6	20.7	10671	DCTN6		x	Tot Ext Exo
421	Q14562	ATP-dependent RNA helicase dhx8	139.2	1659	DHX8		x	Tot Ext Exo
422	Q6V1X1	Dipeptidyl peptidase 8	103.3	54878	DPP8		x	Tot Ext Exo
423	Q9BVJ7	Dual specificity protein phosphatase 23	16.6	54935	DUSP23		x	Tot Ext Exo
424	O75530	Polycomb protein EED	50.2	8726	EED		x	Tot Ext Exo
425	Q8IV48	3'-5' exoribonuclease 1	40	90459	ERI1		x	Tot Ext Exo
426	O75063	Glycosaminoglycan xylosylkinase	46.4	9917	FAM20B		x	Tot Ext Exo
427	Q9Y4E1	WASH complex subunit 2C	144.6	253725	FAM21C; WASHC2C			Tot Ext Exo
428	Q86XK2-1	F-box only protein 11	103.5	80204	FBXO11		x	Tot Ext Exo
429	Q9Y613	FH1/FH2 domain-containing protein 1	126.5	29109	FHOD1	x	x	Tot Ext Exo
430	Q14331	Protein FRG1	29.2	2483	FRG1		x	Tot Ext Exo
431	P04066	tissue alpha-L-fucosidase	53.7	2517	FUCA1	x	x	Tot Ext Exo
432	Q01415-1	N-acetylgalactosamine kinase	50.3	2585	GALK2		x	Tot Ext Exo
433	Q10472	Polypeptide N-acetylgalactosaminyltransferase 1	64.2	2589	GALNT1		x	Tot Ext Exo
434	Q14353-1	guanidinoacetate N-methyltransferase	26.3	2593	GAMT		x	Tot Ext Exo
435	P04406-2	Isoform 2 of Glyceraldehyde-3-phosphate dehydrogenase	31.5	2597	GAPDH	x	x	Tot Ext Exo
436	P48506	glutamate--cysteine ligase catalytic subunit	72.7	2729	GCLC		x	Tot Ext Exo
437	Q7Z5G4-1	Golgin subfamily A member 7	15.8	51125	GOLGA7	x	x	Tot Ext Exo
438	O95249-1	Golgi SNAP receptor complex member 1	28.6	9527	GOSR1	x	x	Tot Ext Exo
439	P49840	Glycogen synthase kinase-3 alpha	50.9	2931	GSK3A	x	x	Tot Ext Exo
440	P21266	glutathione S-transferase Mu 3	26.5	2947	GSTM3	x	x	Tot Ext Exo
441	P30711	Glutathione S-transferase theta-1	27.3	2952	GSTT1		x	Tot Ext Exo
442	O43708	maleylacetoacetate isomerase	24.2	2954	GSTZ1		x	Tot Ext Exo
443	Q8TDQ0	Hepatitis A virus cellular receptor 2	33.4	84868	HAVCR2		x	Tot Ext Exo
444	Q9Y5Z4-1	Heme-binding protein 2	22.9	23593	HEBP2	x	x	Tot Ext Exo
445	P49773	Histidine triad nucleotide-binding protein 1	13.8	3094	HINT1	x	x	Tot Ext Exo
446	P16401	Histone H1.5	22.6	3009	HIST1H1B	x	x	Tot Ext Exo
447	P30501	HLA class I histocompatibility antigen, Cw-2 alpha chain	41.1	3107	HLA-C	x	x	Tot Ext Exo
448	P28068	HLA class II histocompatibility antigen, DM beta chain	28.9	3109	HLA-DMB	x	x	Tot Ext Exo
449	P08397-1	porphobilinogen deaminase	39.3	3145	HMBS	x	x	Tot Ext Exo
450	Q9NPH3	Interleukin-1 receptor accessory protein	65.4	3556	IL1RAP	x	x	Tot Ext Exo
451	P24001	Interleukin-32	26.7	9235	IL32		x	Tot Ext Exo
452	Q14624-1	Inter-alpha-trypsin inhibitor heavy chain H4	103.3	3700	ITIH4	x	x	Tot Ext Exo
453	Q9Y6Y0	influenza virus NS1A-binding protein	71.7	10625	IVNS1ABP		x	Tot Ext Exo
454	Q6NYC1	Bifunctional arginine demethylase and lysyl-hydroxylase JMJD6	46.4	23210	JMJD6	x	x	Tot Ext Exo
455	Q9P0J7	E3 ubiquitin-protein ligase KCMF1	41.9	56888	KCMF1	x	x	Tot Ext Exo
456	Q01546	Keratin, type II cytoskeletal 2 oral	65.8	51350	KRT76	x	x	Tot Ext Exo
457	Q96EK9	Protein KTI12 homolog	38.6	112970	KTI12		x	Tot Ext Exo
458	Q6PKG0-1	La-related protein 1	123.4	23367	LARP1	x	x	Tot Ext Exo
459	Q8WVC0-1	RNA polymerase-associated protein LEO1	75.4	123169	LEO1		x	Tot Ext Exo
460	Q08380	Galectin-3-binding protein	65.3	3959	LGALS3BP	x	x	Tot Ext Exo
461	O00370	LINE-1 retrotransposable element ORF2 protein	148.9		LOC100128274			Tot Ext Exo
462	O15116	U6 snRNA-associated Sm-like protein LSm1	15.2	27257	LSM1		x	Tot Ext Exo
463	Q8ND56	protein LSM14 homolog A	50.5	26065	LSM14A		x	Tot Ext Exo
464	P07948-2	Isoform 2 of Tyrosine-protein kinase Lyn	56	4067	LYN	x	x	Tot Ext Exo
465	Q99698-1	Lysosomal-trafficking regulator	428.9	1130	LYST	x	x	Tot Ext Exo
466	Q8N108	Mesoderm induction early response protein 1	57.9	57708	MIER1		x	Tot Ext Exo
467	Q9UNW1	Multiple inositol polyphosphate phosphatase 1	55	9562	MINPP1		x	Tot Ext Exo
468	O95396	Adenylyltransferase and sulfurtransferase MOCS3	49.6	27304	MOCS3	x	x	Tot Ext Exo
469	P05976-1	Myosin light chain 1/3, skeletal muscle isoform	21.1	4632	MYL1	x	x	Tot Ext Exo
470	Q6PIU2	Neutral cholesterol ester hydrolase 1	45.8	57552	NCEH1	x	x	Tot Ext Exo
471	P52849-1	Bifunctional heparan sulfate N-deacetylase/N-sulfotransferase 2	100.8	8509	NDST2		x	Tot Ext Exo
472	Q8NHV4	Protein NEDD1	71.9	121441	NEDD1	x	x	Tot Ext Exo
473	P46934-4	Isoform 4 of E3 ubiquitin-protein ligase NEDD4	104.2	4734	NEDD4	x	x	Tot Ext Exo
474	P35240-1	merlin	69.6	4771	NF2	x	x	Tot Ext Exo
475	Q9NVX2	Notchless protein homolog 1	53.3	54475	NLE1		x	Tot Ext Exo
476	Q8NFH4	Nucleoporin Nup37	36.7	79023	NUP37		x	Tot Ext Exo
477	Q7Z3B4	Nucleoporin p54	55.4	53371	NUP54		x	Tot Ext Exo
478	Q9Y530	O-acetyl-ADP-ribose deacetylase 1	17	221443	OARD1	x		Tot Ext Exo
479	Q13310	Polyadenylate-binding protein 4	70.7	8761	PABPC4	x	x	Tot Ext Exo
480	P51003	Poly(A) polymerase alpha	82.8	10914	PAPOLA		x	Tot Ext Exo
481	O43252	bifunctional 3'-phosphoadenosine 5'-phosphosulfate synthase 1	70.8	9061	PAPSS1	x	x	Tot Ext Exo
482	Q8NEN9	PDZ domain-containing protein 8	128.5	118987	PDZD8	x	x	Tot Ext Exo
483	Q8N0Y7	Probable phosphoglycerate mutase 4	28.8	441531	PGAM4	x	x	Tot Ext Exo
484	O95394	phosphoacetylglucosamine mutase	59.8	5238	PGM3	x	x	Tot Ext Exo
485	P30613	Pyruvate kinase PKLR	61.8	5313	PKLR	x	x	Tot Ext Exo
486	O43660-1	Pleiotropic regulator 1	57.2	5356	PLRG1	x	x	Tot Ext Exo
487	O43314-1	inositol hexakisphosphate and diphosphoinositol-pentakisphosphate kinase 2	140.3	23262	PPIP5K2	x	x	Tot Ext Exo
488	Q9Y570	Protein phosphatase methylesterase 1	42.3	51400	PPME1	x	x	Tot Ext Exo
489	Q96C90	Protein phosphatase 1 regulatory subunit 14B	15.9	26472	PPP1R14B	x	x	Tot Ext Exo
490	P50897	Palmitoyl-protein thioesterase 1	34.2	5538	PPT1	x	x	Tot Ext Exo
491	P78330	phosphoserine phosphatase	25	5723	PSPH	x	x	Tot Ext Exo
492	Q9BTE6-3	Isoform 3 of Alanyl-tRNA editing protein Aarsd1	65.7	100885850; 100885848; 80755	PTGES3L-AARSD1; PTGES3L; AARSD1			Tot Ext Exo
493	Q93096	Protein tyrosine phosphatase type IVA 1	19.8	7803	PTP4A1	x	x	Tot Ext Exo
494	P20340-1	Ras-related protein Rab-6A	23.6	5870	RAB6A	x	x	Tot Ext Exo
495	P20340-2	Isoform 2 of Ras-related protein Rab-6A	23.5	5870	RAB6A	x	x	Tot Ext Exo
496	Q9BYM8	ranBP-type and C3HC4-type zinc finger-containing protein 1	57.5	10616	RBCK1		x	Tot Ext Exo
497	Q13546	Receptor-interacting serine/threonine-protein kinase 1	75.9	8737	RIPK1		x	Tot Ext Exo
498	Q5TBB1	ribonuclease h2 subunit b	35.1	79621	RNASEH2B		x	Tot Ext Exo
499	P05386	60S acidic ribosomal protein P1	11.5	6176	RPLP1	x	x	Tot Ext Exo
500	Q9H228	Sphingosine 1-phosphate receptor 5	41.7	53637	S1PR5			Tot Ext Exo
501	Q6SZW1	Sterile alpha and TIR motif-containing protein 1	79.3	23098	SARM1		x	Tot Ext Exo
502	A3KN83-1	protein strawberry notch homolog 1	154.2	55206	SBNO1	x	x	Tot Ext Exo
503	Q96KG9	N-terminal kinase-like protein	89.6	57410	SCYL1	x	x	Tot Ext Exo
504	Q9C0C4	Semaphorin-4C	92.6	54910	SEMA4C	x	x	Tot Ext Exo
505	Q92599-1	Septin-8	55.7	23176	SEPT8	x		Tot Ext Exo
506	Q8IW75	Serpin A12	47.1	145264	SERPINA12		x	Tot Ext Exo
507	Q9H6Q3-1	Src-like-adapter 2	28.6	84174	SLA2	x	x	Tot Ext Exo
508	Q92925-1	SWI/SNF-related matrix-associated actin-dependent regulator of chromatin subfamily D member 2	58.9	6603	SMARCD2	x	x	Tot Ext Exo
509	P08579	U2 small nuclear ribonucleoprotein B''	25.5	6629	SNRPB2	x	x	Tot Ext Exo
510	P62316	Small nuclear ribonucleoprotein Sm D2	13.5	6633	SNRPD2	x	x	Tot Ext Exo
511	P62304	small nuclear ribonucleoprotein E	10.8	6635	SNRPE	x	x	Tot Ext Exo
512	Q11201	CMP-N-acetylneuraminate-beta-galactosamide-alpha-2,3-sialyltransferase 1	39.1	6482	ST3GAL1	x	x	Tot Ext Exo
513	Q92783	signal transducing adapter molecule 1	59.1	8027	STAM	x	x	Tot Ext Exo
514	O95630	STAM-binding protein	48	10617	STAMBP	x	x	Tot Ext Exo
515	Q9Y2H1	serine/threonine-protein kinase 38-like	54	23012	STK38L	x	x	Tot Ext Exo
516	Q86Y82	Syntaxin-12	31.6	23673	STX12	x	x	Tot Ext Exo
517	O43426	Synaptojanin-1	173	8867	SYNJ1		x	Tot Ext Exo
518	Q9UI15	Transgelin-3	22.5	29114	TAGLN3		x	Tot Ext Exo
519	Q9NUY8	TBC1 domain family member 23	78.3	55773	TBC1D23		x	Tot Ext Exo
520	Q15370	Elongin-B	13.1	6923	TCEB2; ELOB			Tot Ext Exo
521	Q92734-1	Protein TFG	43.4	10342	TFG	x	x	Tot Ext Exo
522	Q8N1K5-1	protein THEMIS	73.4	387357	THEMIS	x	x	Tot Ext Exo
523	Q9Y4G6	Talin-2	271.4	83660	TLN2	x	x	Tot Ext Exo
524	Q13445	Transmembrane emp24 domain-containing protein 1	25.2	11018	TMED1	x	x	Tot Ext Exo
525	Q7Z7N9	Transmembrane protein 179B	23.5	374395	TMEM179B		x	Tot Ext Exo
526	Q9H0R3	transmembrane protein 222	23.2	84065	TMEM222		x	Tot Ext Exo
527	Q8IYM9-1	E3 ubiquitin-protein ligase TRIM22	56.9	10346	TRIM22		x	Tot Ext Exo
528	Q8N0Z6	Tetratricopeptide repeat protein 5	48.9	91875	TTC5		x	Tot Ext Exo
529	O43914-1	TYRO protein tyrosine kinase-binding protein	12.2	7305	TYROBP		x	Tot Ext Exo
530	Q16222-1	UDP-N-acetylhexosamine pyrophosphorylase	58.7	6675	UAP1	x	x	Tot Ext Exo
531	Q9BSL1	ubiquitin-associated domain-containing protein 1	45.3	10422	UBAC1	x	x	Tot Ext Exo
532	Q969M7	NEDD8-conjugating enzyme UBE2F	21.1	140739	UBE2F		x	Tot Ext Exo
533	O95071	E3 ubiquitin-protein ligase UBR5	309.2	51366	UBR5		x	Tot Ext Exo
534	P63027	Vesicle-associated membrane protein 2	12.7	6844	VAMP2	x	x	Tot Ext Exo
535	Q8NEZ2	Vacuolar protein sorting-associated protein 37A	44.3	137492	VPS37A		x	Tot Ext Exo
536	Q8N3P4-1	Vacuolar protein sorting-associated protein 8 homolog	161.7	23355	VPS8	x	x	Tot Ext Exo
537	Q9H4A3	Serine/threonine-protein kinase WNK1	250.6	65125	WNK1	x	x	Tot Ext Exo
538	O00308	NEDD4-like E3 ubiquitin-protein ligase WWP2	98.9	11060	WWP2	x	x	Tot Ext Exo
539	Q9BSR8	protein YIPF4	27.1	84272	YIPF4		x	Tot Ext Exo
540	O75312	Zinc finger protein ZPR1	50.9	8882	ZNF259; ZPR1			Tot Ext Exo
541	Q86V21-1	acetoacetyl-CoA synthetase	75.1	65985	AACS	x	x	Tot Ext MV
542	Q5JTZ9	alanine--tRNA ligase, mitochondrial	107.3	57505	AARS2		x	Tot Ext MV
543	P80404	4-aminobutyrate aminotransferase, mitochondrial	56.4	18	ABAT		x	Tot Ext MV
544	P28288	ATP-binding cassette sub-family D member 3	75.4	5825	ABCD3	x	x	Tot Ext MV
545	Q9NUQ8	ATP-binding cassette sub-family F member 3	79.7	55324	ABCF3	x	x	Tot Ext MV
546	Q9NUJ1	Mycophenolic acid acyl-glucuronide esterase, mitochondrial	33.9	55347	ABHD10		x	Tot Ext MV
547	Q8NFV4	Protein Abhd11	34.7	83451	ABHD11	x	x	Tot Ext MV
548	Q8N2K0	Monoacylglycerol lipase ABHD12	45.1	26090	ABHD12		x	Tot Ext MV
549	Q12979	active breakpoint cluster region-related protein	97.5	29	ABR	x	x	Tot Ext MV
550	P09110-1	3-ketoacyl-CoA thiolase, peroxisomal	44.3	30	ACAA1	x	x	Tot Ext MV
551	Q9H845	Acyl-CoA dehydrogenase family member 9, mitochondrial	68.7	28976	ACAD9		x	Tot Ext MV
552	P11310-1	medium-chain specific acyl-CoA dehydrogenase, mitochondrial	46.6	34	ACADM	x	x	Tot Ext MV
553	P16219	Short-chain specific acyl-CoA dehydrogenase, mitochondrial	44.3	35	ACADS		x	Tot Ext MV
554	P45954	Short/branched chain specific acyl-CoA dehydrogenase, mitochondrial	47.5	36	ACADSB		x	Tot Ext MV
555	P49748-1	Very long-chain specific acyl-CoA dehydrogenase, mitochondrial	70.3	37	ACADVL		x	Tot Ext MV
556	Q9UKV3-1	Apoptotic chromatin condensation inducer in the nucleus	151.8	22985	ACIN1	x	x	Tot Ext MV
557	P49753-1	Acyl-coenzyme A thioesterase 2, mitochondrial	53.2	10965	ACOT2		x	Tot Ext MV
558	O14734	Acyl-coenzyme A thioesterase 8	35.9	10005	ACOT8		x	Tot Ext MV
559	Q9Y305-1	Acyl-coenzyme A thioesterase 9, mitochondrial	49.9	23597	ACOT9		x	Tot Ext MV
560	Q15067-2	Isoform 2 of Peroxisomal acyl-coenzyme A oxidase 1	74.6	51	ACOX1		x	Tot Ext MV
561	O15254	Peroxisomal acyl-coenzyme A oxidase 3	77.6	8310	ACOX3		x	Tot Ext MV
562	P11117	Lysosomal acid phosphatase	48.3	53	ACP2	x	x	Tot Ext MV
563	P33121	Long-chain-fatty-acid--CoA ligase 1	77.9	2180	ACSL1	x	x	Tot Ext MV
564	O95573	long-chain-fatty-acid--CoA ligase 3	80.4	2181	ACSL3	x	x	Tot Ext MV
565	Q9NUB1	Acetyl-coenzyme A synthetase 2-like, mitochondrial	74.8	84532	ACSS1		x	Tot Ext MV
566	P55265-1	Double-stranded RNA-specific adenosine deaminase	136	103	ADAR	x	x	Tot Ext MV
567	Q9Y4W6	AFG3-like protein 2	88.5	10939	AFG3L2		x	Tot Ext MV
568	P52594-1	Arf-GAP domain and FG repeat-containing protein 1	58.2	3267	AGFG1		x	Tot Ext MV
569	Q53H12	Acylglycerol kinase, mitochondrial	47.1	55750	AGK	x	x	Tot Ext MV
570	Q9UL18	protein argonaute-1	97.2	26523	AGO1; EIF2C1			Tot Ext MV
571	O00116	Alkyldihydroxyacetonephosphate synthase, peroxisomal	72.9	8540	AGPS	x	x	Tot Ext MV
572	O95831-1	Apoptosis-inducing factor 1, mitochondrial	66.9	9131	AIFM1		x	Tot Ext MV
573	Q9UIJ7-1	GTP:AMP phosphotransferase AK3, mitochondrial	25.6	50808	AK3	x	x	Tot Ext MV
574	P27144	Adenylate kinase 4, mitochondrial	25.3	205	AK4; LOC100507855			Tot Ext MV
575	O43823	A-kinase anchor protein 8	76.1	10270	AKAP8		x	Tot Ext MV
576	P31751	RAC-beta serine/threonine-protein kinase	55.7	208	AKT2	x	x	Tot Ext MV
577	P13716-1	Delta-aminolevulinic acid dehydratase	36.3	210	ALAD	x	x	Tot Ext MV
578	P30837	Aldehyde dehydrogenase X, mitochondrial	57.2	219	ALDH1B1		x	Tot Ext MV
579	P51648	Fatty aldehyde dehydrogenase	54.8	224	ALDH3A2	x	x	Tot Ext MV
580	P30038	Delta-1-pyrroline-5-carboxylate dehydrogenase, mitochondrial	61.7	8659	ALDH4A1		x	Tot Ext MV
581	Q02252	Methylmalonate-semialdehyde dehydrogenase [acylating], mitochondrial	57.8	4329	ALDH6A1	x	x	Tot Ext MV
582	Q9Y673	dolichyl-phosphate beta-glucosyltransferase	36.9	29880	ALG5		x	Tot Ext MV
583	Q9Y672	Dolichyl pyrophosphate Man9GlcNAc2 alpha-1,3-glucosyltransferase	58.1	29929	ALG6		x	Tot Ext MV
584	Q9UJX3-1	Anaphase-promoting complex subunit 7	66.8	51434	ANAPC7	x	x	Tot Ext MV
585	O75179-1	Ankyrin repeat domain-containing protein 17	274.1	26057	ANKRD17	x	x	Tot Ext MV
586	Q9H8Y5	Ankyrin repeat and zinc finger domain-containing protein 1	80.9	55139	ANKZF1	x	x	Tot Ext MV
587	P58335-1	Anthrax toxin receptor 2	53.6	118429	ANTXR2	x	x	Tot Ext MV
588	Q9Y6B7	AP-4 complex subunit beta-1	83.2	10717	AP4B1		x	Tot Ext MV
589	Q9UH17-1	DNA dC->dU-editing enzyme APOBEC-3B	45.9	9582	APOBEC3B	x	x	Tot Ext MV
590	Q8IUX4-1	DNA dC->dU-editing enzyme APOBEC-3F	45	200316	APOBEC3F		x	Tot Ext MV
591	Q9BUR5-1	MICOS complex subunit MIC26	22.3	79135	APOO	x	x	Tot Ext MV
592	Q9UKG1	DCC-interacting protein 13-alpha	79.6	26060	APPL1	x	x	Tot Ext MV
593	P10398-1	serine/threonine-protein kinase A-Raf	67.5	369	ARAF	x	x	Tot Ext MV
594	Q8WZ64	Arf-GAP with Rho-GAP domain, ANK repeat and PH domain-containing protein 2	193.3	116984	ARAP2		x	Tot Ext MV
595	Q8N6H7	ADP-ribosylation factor GTPase-activating protein 2	56.7	84364	ARFGAP2		x	Tot Ext MV
596	Q9Y6D6	Brefeldin A-inhibited guanine nucleotide-exchange protein 1	208.6	10565	ARFGEF1		x	Tot Ext MV
597	P53367-2	Isoform A of Arfaptin-1	38.6	27236	ARFIP1	x	x	Tot Ext MV
598	Q9BRR9	Rho GTPase-activating protein 9	83.2	64333	ARHGAP9	x	x	Tot Ext MV
599	O14497	AT-rich interactive domain-containing protein 1A	241.9	8289	ARID1A	x	x	Tot Ext MV
600	Q9Y2Y0	ADP-ribosylation factor-like protein 2-binding protein	18.8	23568	ARL2BP		x	Tot Ext MV
601	Q8N2F6-1	Armadillo repeat-containing protein 10	37.5	83787	ARMC10		x	Tot Ext MV
602	Q13510	Acid ceramidase	44.6	427	ASAH1	x	x	Tot Ext MV
603	Q9ULH1-1	Arf-GAP with SH3 domain, ANK repeat and PH domain-containing protein 1	125.4	50807	ASAP1	x	x	Tot Ext MV
604	Q9H1I8-1	Activating signal cointegrator 1 complex subunit 2	86.3	84164	ASCC2		x	Tot Ext MV
605	Q8NBU5	ATPase family aaa domain-containing protein 1	40.7	84896	ATAD1		x	Tot Ext MV
606	Q9NVI7	ATPase family AAA domain-containing protein 3A	71.3	55210	ATAD3A	x	x	Tot Ext MV
607	Q5T9A4	ATPase family AAA domain-containing protein 3B	72.5	83858	ATAD3B	x	x	Tot Ext MV
608	Q8NHH9	Atlastin-2	66.2	64225	ATL2	x	x	Tot Ext MV
609	Q9HD20	manganese-transporting ATPase 13A1	132.9	57130	ATP13A1		x	Tot Ext MV
610	P27449	V-type proton ATPase 16 kDa proteolipid subunit	15.7	527	ATP6V0C	x	x	Tot Ext MV
611	Q8TF62	probable phospholipid-transporting ATPase IM	135.8	79895	ATP8B4		x	Tot Ext MV
612	Q8WWM7-1	ataxin-2-like protein	113.3	11273	ATXN2L	x	x	Tot Ext MV
613	Q9Y679-1	Ancient ubiquitous protein 1	53	550	AUP1		x	Tot Ext MV
614	Q9NWV8	BRISC and BRCA1-A complex member 1	36.5	29086	BABAM1	x	x	Tot Ext MV
615	Q16611	bcl-2 homologous antagonist/killer	23.4	578	BAK1		x	Tot Ext MV
616	Q9NRL2	Bromodomain adjacent to zinc finger domain protein 1A	178.6	11177	BAZ1A		x	Tot Ext MV
617	O15382	Branched-chain-amino-acid aminotransferase, mitochondrial	44.3	587	BCAT2		x	Tot Ext MV
618	O14874	[3-methyl-2-oxobutanoate dehydrogenase [lipoamide]] kinase, mitochondrial	46.3	10295	BCKDK		x	Tot Ext MV
619	P10415-1	Apoptosis regulator Bcl-2	26.2	596	BCL2		x	Tot Ext MV
620	Q07817-1	bcl-2-like protein 1	26	598	BCL2L1		x	Tot Ext MV
621	Q9NYF8-1	Bcl-2-associated transcription factor 1	106.1	9774	BCLAF1		x	Tot Ext MV
622	Q9Y276	Mitochondrial chaperone BCS1	47.5	617	BCS1L		x	Tot Ext MV
623	Q02338	D-beta-hydroxybutyrate dehydrogenase, mitochondrial	38.1	622	BDH1		x	Tot Ext MV
624	O00499	Myc box-dependent-interacting protein 1	64.7	274	BIN1	x	x	Tot Ext MV
625	Q9UL45	Biogenesis of lysosome-related organelles complex 1 subunit 6	19.7	26258	BLOC1S6			Tot Ext MV
626	Q12982	BCL2/adenovirus E1B 19 kDa protein-interacting protein 2	36	663	BNIP2		x	Tot Ext MV
627	O60885-1	Bromodomain-containing protein 4	152.1	23476	BRD4	x	x	Tot Ext MV
628	P78410-1	Butyrophilin subfamily 3 member A2	36.4	11118	BTN3A2	x	x	Tot Ext MV
629	O00478	Butyrophilin subfamily 3 member A3	65	10384	BTN3A3	x	x	Tot Ext MV
630	Q96C57	Uncharacterized protein C12orf43	28.2	64897	C12orf43		x	Tot Ext MV
631	Q96S19	Methyltransferase-like 26	22.6	84326	C16orf13; METTL26			Tot Ext MV
632	Q9BQA9-1	Uncharacterized protein C17orf62	20.8	79415	C17orf62		x	Tot Ext MV
633	P30042-1	ES1 protein homolog, mitochondrial	28.2	8209; 102724023	C21orf33; LOC102724023			Tot Ext MV
634	Q8WWC4	m-AAA protease-interacting protein 1, mitochondrial	32.5	79568	C2orf47; MAIP1			Tot Ext MV
635	Q7Z4R8	UPF0669 protein C6orf120	20.8	387263	C6orf120		x	Tot Ext MV
636	Q9BUH6	Protein PAXX	21.6	286257	C9orf142; PAXX			Tot Ext MV
637	Q9HA77	probable cysteine--tRNA ligase, mitochondrial	62.2	79587	CARS2		x	Tot Ext MV
638	O14936	peripheral plasma membrane protein CASK	105.1	8573	CASK	x	x	Tot Ext MV
639	P29466-1	caspase-1	45.1	834	CASP1		x	Tot Ext MV
640	Q92851-1	caspase-10	58.9	843	CASP10		x	Tot Ext MV
641	P49662	Caspase-4	43.2	837	CASP4		x	Tot Ext MV
642	P83916	Chromobox protein homolog 1	21.4	10951	CBX1	x	x	Tot Ext MV
643	Q96NT0	Coiled-coil domain-containing protein 115	19.7	84317	CCDC115	x	x	Tot Ext MV
644	Q9H6E4	Coiled-coil domain-containing protein 134	26.5	79879	CCDC134	x	x	Tot Ext MV
645	Q96A33-1	Coiled-coil domain-containing protein 47	55.8	57003	CCDC47	x	x	Tot Ext MV
646	Q96ER9	Coiled-coil domain-containing protein 51	45.8	79714	CCDC51		x	Tot Ext MV
647	A6NC98	Coiled-coil domain-containing protein 88B	164.7	283234	CCDC88B	x	x	Tot Ext MV
648	Q9GZT6	Coiled-coil domain-containing protein 90B, mitochondrial	29.5	60492	CCDC90B		x	Tot Ext MV
649	Q567U6	Coiled-coil domain-containing protein 93	73.2	54520	CCDC93	x	x	Tot Ext MV
650	Q9UIB8	SLAM family member 5	38.8	8832	CD84	x	x	Tot Ext MV
651	O75794	Cell division cycle protein 123 homolog	39.1	8872	CDC123		x	Tot Ext MV
652	Q9UJX2-1	cell division cycle protein 23 homolog	68.8	8697	CDC23	x	x	Tot Ext MV
653	P30260	cell division cycle protein 27 homolog	91.8	996	CDC27	x	x	Tot Ext MV
654	Q00535	Cyclin-dependent-like kinase 5	33.3	1020	CDK5	x	x	Tot Ext MV
655	P50750	Cyclin-dependent kinase 9	42.8	1025	CDK9	x	x	Tot Ext MV
656	O95674-1	phosphatidate cytidylyltransferase 2	51.4	8760	CDS2	x	x	Tot Ext MV
657	Q9NZK5	Adenosine deaminase 2	58.9	51816	CECR1; ADA2			Tot Ext MV
658	Q9BXW7	Haloacid dehalogenase-like hydrolase domain-containing 5	46.3	27440	CECR5; HDHD5			Tot Ext MV
659	Q9Y6K0	Choline/ethanolaminephosphotransferase 1	46.5	10390	CEPT1		x	Tot Ext MV
660	Q96G23	Ceramide synthase 2	44.8	29956	CERS2		x	Tot Ext MV
661	Q8WUX2	Glutathione-specific gamma-glutamylcyclotransferase 2	20.9	494143	CHAC2		x	Tot Ext MV
662	Q9NX63	MICOS complex subunit MIC19	26.1	54927	CHCHD3	x	x	Tot Ext MV
663	Q9BWS9-1	Chitinase domain-containing protein 1	44.9	66005	CHID1	x	x	Tot Ext MV
664	Q9Y259-1	Choline/ethanolamine kinase	45.2	1120	CHKB		x	Tot Ext MV
665	Q9P2E5-1	Chondroitin sulfate glucuronyltransferase	85.9	54480	CHPF2		x	Tot Ext MV
666	Q07065	Cytoskeleton-associated protein 4	66	10970	CKAP4	x	x	Tot Ext MV
667	Q92478	C-type lectin domain family 2 member B	17.3	9976	CLEC2B		x	Tot Ext MV
668	Q13286-1	Battenin	47.6	1201	CLN3	x	x	Tot Ext MV
669	Q9NWW5	ceroid-lipofuscinosis neuronal protein 6	35.9	54982	CLN6		x	Tot Ext MV
670	Q16740	ATP-dependent Clp protease proteolytic subunit, mitochondrial	30.2	8192	CLPP		x	Tot Ext MV
671	Q96KA5-1	cleft lip and palate transmembrane protein 1-like protein	62.2	81037	CLPTM1L		x	Tot Ext MV
672	O76031	ATP-dependent Clp protease ATP-binding subunit clpX-like, mitochondrial	69.2	10845	CLPX	x	x	Tot Ext MV
673	Q5EBM0-1	UMP-CMP kinase 2, mitochondrial	49.4	129607	CMPK2	x	x	Tot Ext MV
674	Q8N1G2	Cap-specific mRNA (nucleoside-2'-O-)-methyltransferase 1	95.3	23070	CMTR1; FTSJD2			Tot Ext MV
675	Q9H9A5	CCR4-NOT transcription complex subunit 10	82.3	25904	CNOT10		x	Tot Ext MV
676	Q9BT09	Protein canopy homolog 3	30.7	10695	CNPY3		x	Tot Ext MV
677	Q8N129	Protein canopy homolog 4	28.3	245812	CNPY4		x	Tot Ext MV
678	Q9H9E3-1	Conserved oligomeric Golgi complex subunit 4	89	25839	COG4	x	x	Tot Ext MV
679	Q9Y6G5	COMM domain-containing protein 10	23	51397	COMMD10		x	Tot Ext MV
680	O75208-1	Ubiquinone biosynthesis protein COQ9, mitochondrial	35.5	57017	COQ9		x	Tot Ext MV
681	P00395	Cytochrome c oxidase subunit 1	57	4512	COX1			Tot Ext MV
682	Q7KZN9	Cytochrome c oxidase assembly protein COX15 homolog	46	1355	COX15		x	Tot Ext MV
683	Q9UKF6	Cleavage and polyadenylation specificity factor subunit 3	77.4	51692	CPSF3	x	x	Tot Ext MV
684	P50416	Carnitine O-palmitoyltransferase 1, liver isoform	88.3	1374	CPT1A		x	Tot Ext MV
685	P23786	Carnitine O-palmitoyltransferase 2, mitochondrial	73.7	1376	CPT2		x	Tot Ext MV
686	O75629	Protein CREG1	24.1	8804	CREG1	x	x	Tot Ext MV
687	O95825-1	Quinone oxidoreductase-like protein 1	38.7	9946	CRYZL1	x	x	Tot Ext MV
688	Q05048	Cleavage stimulation factor subunit 1	48.3	1477	CSTF1	x	x	Tot Ext MV
689	Q12996-1	Cleavage stimulation factor subunit 3	82.9	1479	CSTF3	x	x	Tot Ext MV
690	Q8WYA6	Beta-catenin-like protein 1	65.1	56259	CTNNBL1		x	Tot Ext MV
691	Q6PD62	RNA polymerase-associated protein CTR9 homolog	133.4	9646	CTR9	x	x	Tot Ext MV
692	Q9HCG8	Pre-mRNA-splicing factor CWC22 homolog	105.4	57703	CWC22		x	Tot Ext MV
693	P00167-1	Cytochrome b5	15.3	1528	CYB5A	x	x	Tot Ext MV
694	Q9NQC7	Ubiquitin carboxyl-terminal hydrolase CYLD	107.2	1540	CYLD		x	Tot Ext MV
695	P00156	cytochrome b	42.7	4519	CYTB		x	Tot Ext MV
696	Q9UIA0	Cytohesin-4	45.6	27128	CYTH4		x	Tot Ext MV
697	Q6PI48	Aspartate--tRNA ligase, mitochondrial	73.5	55157	DARS2		x	Tot Ext MV
698	Q96EP5	DAZ-associated protein 1	43.4	26528	DAZAP1		x	Tot Ext MV
699	P32321	deoxycytidylate deaminase	20	1635	DCTD		x	Tot Ext MV
700	Q92466	DNA damage-binding protein 2	47.8	1643	DDB2		x	Tot Ext MV
701	Q9NUU7	ATP-dependent RNA helicase DDX19A	53.9	55308	DDX19A	x	x	Tot Ext MV
702	Q9UMR2-1	ATP-dependent RNA helicase DDX19B	53.9	11269	DDX19B	x	x	Tot Ext MV
703	Q86XP3-1	ATP-dependent RNA helicase DDX42	102.9	11325	DDX42		x	Tot Ext MV
704	Q8TDD1	ATP-dependent RNA helicase DDX54	98.5	79039	DDX54	x	x	Tot Ext MV
705	O95786	Probable ATP-dependent RNA helicase DDX58	106.5	23586	DDX58	x	x	Tot Ext MV
706	Q8IY21	Probable ATP-dependent RNA helicase DDX60	197.7	55601	DDX60	x	x	Tot Ext MV
707	Q5H9U9-1	Probable ATP-dependent RNA helicase DDX60-like	197.5	91351	DDX60L		x	Tot Ext MV
708	O15121	Sphingolipid delta(4)-desaturase DES1	37.8	8560	DEGS1		x	Tot Ext MV
709	A2RUS2	DENN domain-containing protein 3	135.8	22898	DENND3	x	x	Tot Ext MV
710	Q5VZ89-7	Isoform 2 of DENN domain-containing protein 4C	217.7	55667	DENND4C		x	Tot Ext MV
711	Q9GZP9	Derlin-2	27.5	51009	DERL2		x	Tot Ext MV
712	Q6ICB0	Desumoylating isopeptidase 1	18.3	27351	DESI1		x	Tot Ext MV
713	P23743-1	diacylglycerol kinase alpha	82.6	1606	DGKA	x	x	Tot Ext MV
714	Q9UBM7	7-dehydrocholesterol reductase	54.5	1717	DHCR7	x	x	Tot Ext MV
715	Q9BTZ2	dehydrogenase/reductase sdr family member 4	29.5	10901	DHRS4		x	Tot Ext MV
716	Q96HY7	Probable 2-oxoglutarate dehydrogenase E1 component DHKTD1, mitochondrial	103	55526	DHTKD1		x	Tot Ext MV
717	Q7L2E3-1	Putative ATP-dependent RNA helicase DHX30	133.9	22907	DHX30	x	x	Tot Ext MV
718	Q9H2U1	ATP-dependent RNA helicase DHX36	114.7	170506	DHX36	x	x	Tot Ext MV
719	Q6P158-1	putative ATP-dependent RNA helicase DHX57	155.5	90957	DHX57		x	Tot Ext MV
720	Q96C10	probable ATP-dependent RNA helicase DHX58	76.6	79132	DHX58		x	Tot Ext MV
721	Q9UPY3	endoribonuclease Dicer	218.5	23405	DICER1		x	Tot Ext MV
722	Q9UNQ2	Probable dimethyladenosine transferase	35.2	27292	DIMT1	x	x	Tot Ext MV
723	Q8IYB7	DIS3-like exonuclease 2	99.2	129563	DIS3L2	x	x	Tot Ext MV
724	P10515	Dihydrolipoyllysine-residue acetyltransferase component of pyruvate dehydrogenase complex, mitochondrial	69	1737	DLAT	x	x	Tot Ext MV
725	Q96EY1-1	DnaJ homolog subfamily A member 3, mitochondrial	52.5	9093	DNAJA3		x	Tot Ext MV
726	Q8IXB1-1	DnaJ homolog subfamily C member 10	91	54431	DNAJC10	x	x	Tot Ext MV
727	Q9NVH1-1	DnaJ homolog subfamily C member 11	63.2	55735	DNAJC11	x	x	Tot Ext MV
728	Q9NVM6	DnaJ homolog subfamily C member 17	34.7	55192	DNAJC17		x	Tot Ext MV
729	Q5F1R6	DnaJ homolog subfamily C member 21	62	134218	DNAJC21		x	Tot Ext MV
730	Q9BZ29-1	Dedicator of cytokinesis protein 9	236.3	23348	DOCK9	x	x	Tot Ext MV
731	Q9BU89	Deoxyhypusine hydroxylase	32.9	83475	DOHH		x	Tot Ext MV
732	Q86YN1-1	Dolichyldiphosphatase 1	27	57171	DOLPP1		x	Tot Ext MV
733	Q9H3H5-1	UDP-N-acetylglucosamine--dolichyl-phosphate N-acetylglucosaminephosphotransferase	46.1	1798	DPAGT1		x	Tot Ext MV
734	Q8TEA8	D-aminoacyl-tRNA deacylase 1	23.4	92675	DTD1		x	Tot Ext MV
735	O75521	Enoyl-CoA delta isomerase 2, mitochondrial	43.6	10455	ECI2		x	Tot Ext MV
736	Q9BQ95	Evolutionarily conserved signaling intermediate in Toll pathway, mitochondrial	49.1	51295	ECSIT	x	x	Tot Ext MV
737	Q9BZQ6	ER degradation-enhancing alpha-mannosidase-like protein 3	104.6	80267	EDEM3		x	Tot Ext MV
738	P57772	selenocysteine-specific elongation factor	65.3	60678	EEFSEC	x	x	Tot Ext MV
739	Q7Z2Z2	Elongation factor-like GTPase 1	125.4	79631	EFTUD1; EFL1			Tot Ext MV
740	Q8N9N8	probable RNA-binding protein EIF1AD	19	84285	EIF1AD		x	Tot Ext MV
741	P41214	Eukaryotic translation initiation factor 2d	64.7	1939	EIF2D	x	x	Tot Ext MV
742	O75821	Eukaryotic translation initiation factor 3 subunit G	35.6	8666	EIF3G	x	x	Tot Ext MV
743	Q8N5X7	Eukaryotic translation initiation factor 4E type 3	24.4	317649	EIF4E3		x	Tot Ext MV
744	Q9BW60	Elongation of very long chain fatty acids protein 1	32.6	64834	ELOVL1	x	x	Tot Ext MV
745	Q9NYP7-1	elongation of very long chain fatty acids protein 5	35.3	60481	ELOVL5		x	Tot Ext MV
746	Q15006	ER membrane protein complex subunit 2	34.8	9694	EMC2		x	Tot Ext MV
747	Q9P0I2	ER membrane protein complex subunit 3	29.9	55831	EMC3		x	Tot Ext MV
748	Q5J8M3-1	ER membrane protein complex subunit 4	20.1	51234	EMC4		x	Tot Ext MV
749	Q9NPA0	ER membrane protein complex subunit 7	26.5	56851	EMC7		x	Tot Ext MV
750	O43402	ER membrane protein complex subunit 8	23.8	10328	EMC8		x	Tot Ext MV
751	Q5NDL2	EGF domain-specific O-linked N-acetylglucosamine transferase	62	285203	EOGT		x	Tot Ext MV
752	Q9HCE0-1	Ectopic P granules protein 5 homolog	292.3	57724	EPG5		x	Tot Ext MV
753	Q6P179	Endoplasmic reticulum aminopeptidase 2	110.4	64167	ERAP2		x	Tot Ext MV
754	Q2NKX8	Dna excision repair protein ercc-6-like	141	54821	ERCC6L		x	Tot Ext MV
755	Q969X5	Endoplasmic reticulum-Golgi intermediate compartment protein 1	32.6	57222	ERGIC1	x	x	Tot Ext MV
756	Q96RQ1	Endoplasmic reticulum-Golgi intermediate compartment protein 2	42.5	51290	ERGIC2	x	x	Tot Ext MV
757	O75477	erlin-1	38.9	10613	ERLIN1	x	x	Tot Ext MV
758	O94905-1	Erlin-2	37.8	11160	ERLIN2	x	x	Tot Ext MV
759	Q7Z2K6	Endoplasmic reticulum metallopeptidase 1	100.2	79956	ERMP1	x	x	Tot Ext MV
760	O95571	Persulfide dioxygenase ETHE1, mitochondrial	27.9	23474	ETHE1	x	x	Tot Ext MV
761	O00471	Exocyst complex component 5	81.8	10640	EXOC5	x	x	Tot Ext MV
762	Q8TAG9	Exocyst complex component 6	93.7	54536	EXOC6	x	x	Tot Ext MV
763	Q9NQT4	Exosome complex component RRP46	25.2	56915	EXOSC5	x	x	Tot Ext MV
764	O95864	fatty acid desaturase 2	52.2	9415	FADS2		x	Tot Ext MV
765	Q96CS3	FAS-associated factor 2	52.6	23197	FAF2		x	Tot Ext MV
766	Q6P587-1	Acylpyruvase FAHD1, mitochondrial	24.8	81889	FAHD1		x	Tot Ext MV
767	Q9NRY5	Protein FAM114A2	55.4	10827	FAM114A2		x	Tot Ext MV
768	A6NFQ2	TRPM8 channel-associated factor 2	100.8	285966	FAM115C; TCAF2			Tot Ext MV
769	Q5W0V3	Protein FAM160B1	86.5	57700	FAM160B1		x	Tot Ext MV
770	Q15018	BRISC complex subunit Abraxas 2	46.9	23172	FAM175B; ABRAXAS2			Tot Ext MV
771	Q9BTY7	Protein HGH1 homolog	42.1	51236	FAM203B; FAM203A; HGH1			Tot Ext MV
772	Q96ND0	Protein FAM210A	30.8	125228	FAM210A		x	Tot Ext MV
773	Q96TC7	Regulator of microtubule dynamics protein 3	52.1	55177	FAM82A2; RMDN3			Tot Ext MV
774	Q96DB5	regulator of microtubule dynamics protein 1	35.8	51115	FAM82B; RMDN1			Tot Ext MV
775	Q9H5X1-1	MIP18 family protein FAM96A	18.3	84191	FAM96A		x	Tot Ext MV
776	Q52LJ0-2	Isoform 2 of Protein FAM98B	45.5	283742	FAM98B	x	x	Tot Ext MV
777	Q9BXW9-1	Isoform 1 of Fanconi anemia group D2 protein	166.4	2177	FANCD2		x	Tot Ext MV
778	Q9NYY8	FAST kinase domain-containing protein 2, mitochondrial	81.4	22868	FASTKD2		x	Tot Ext MV
779	Q7L8L6	FAST kinase domain-containing protein 5, mitochondrial	86.5	60493	FASTKD5		x	Tot Ext MV
780	Q9Y3I1	F-box only protein 7	58.5	25793	FBXO7		x	Tot Ext MV
781	P22570	NADPH:adrenodoxin oxidoreductase, mitochondrial	53.8	2232	FDXR		x	Tot Ext MV
782	P22830-1	Ferrochelatase, mitochondrial	47.8	2235	FECH		x	Tot Ext MV
783	P07332-1	Tyrosine-protein kinase Fes/Fps	93.4	2242	FES	x	x	Tot Ext MV
784	Q00688	peptidyl-prolyl cis-trans isomerase FKBP3	25.2	2287	FKBP3	x	x	Tot Ext MV
785	Q14318	peptidyl-prolyl cis-trans isomerase FKBP8	44.5	23770	FKBP8	x	x	Tot Ext MV
786	Q8NFF5	FAD synthase	65.2	80308	FLAD1		x	Tot Ext MV
787	Q06787	synaptic functional regulator FMR1	71.1	2332	FMR1		x	Tot Ext MV
788	P49356	protein farnesyltransferase subunit beta	48.7	2342; 100529261	FNTB; CHURC1-FNTB			Tot Ext MV
789	Q96CU9	FAD-dependent oxidoreductase domain-containing protein 1	53.8	55572	FOXRED1		x	Tot Ext MV
790	Q9C0B1-1	alpha-ketoglutarate-dependent dioxygenase FTO	58.2	79068	FTO		x	Tot Ext MV
791	Q8IY81	pre-rRNA processing protein FTSJ3	96.5	117246	FTSJ3	x	x	Tot Ext MV
792	Q96I24-1	Far upstream element-binding protein 3	61.6	8939	FUBP3	x	x	Tot Ext MV
793	Q9BYC5	Alpha-(1,6)-fucosyltransferase	66.5	2530	FUT8	x	x	Tot Ext MV
794	P51116	Fragile X mental retardation syndrome-related protein 2	74.2	9513	FXR2	x	x	Tot Ext MV
795	Q14435	Polypeptide N-acetylgalactosaminyltransferase 3	72.6	2591	GALNT3	x	x	Tot Ext MV
796	Q9H2C0	Gigaxonin	67.6	8139	GAN	x	x	Tot Ext MV
797	Q14697-1	Neutral alpha-glucosidase AB	106.8	23193	GANAB	x	x	Tot Ext MV
798	Q14697-2	Isoform 2 of Neutral alpha-glucosidase AB	109.4	23193	GANAB	x	x	Tot Ext MV
799	O75323-1	Protein NipSnap homolog 2	33.7	2631	GBAS; NIPSNAP2			Tot Ext MV
800	O75600-1	2-amino-3-ketobutyrate coenzyme A ligase, mitochondrial	45.3	23464	GCAT		x	Tot Ext MV
801	Q92947-1	Glutaryl-CoA dehydrogenase, mitochondrial	48.1	2639	GCDH		x	Tot Ext MV
802	Q7L5D6	Golgi to ER traffic protein 4 homolog	36.5	51608	GET4	x	x	Tot Ext MV
803	Q96RP9	Elongation factor G, mitochondrial	83.4	85476	GFM1	x	x	Tot Ext MV
804	Q969S9	Ribosome-releasing factor 2, mitochondrial	86.5	84340	GFM2	x	x	Tot Ext MV
805	Q8N2G8-1	GH3 domain-containing protein	57.5	84514	GHDC		x	Tot Ext MV
806	Q8WWP7	GTPase IMAP family member 1	34.3	170575	GIMAP1		x	Tot Ext MV
807	Q9BRT9	DNA replication complex GINS protein SLD5	26	84296	GINS4		x	Tot Ext MV
808	P32189-1	Isoform 1 of Glycerol kinase	57.5	2710	GK		x	Tot Ext MV
809	Q92990	Glomulin	68.2	11146	GLMN	x	x	Tot Ext MV
810	O94925-1	Glutaminase kidney isoform, mitochondrial	73.4	2744	GLS	x	x	Tot Ext MV
811	O94925-3	Isoform 3 of Glutaminase kidney isoform, mitochondrial	65.4	2744	GLS	x	x	Tot Ext MV
812	P17900	Ganglioside GM2 activator	20.8	2760	GM2A	x	x	Tot Ext MV
813	Q9P107	GEM-interacting protein	106.6	51291	GMIP		x	Tot Ext MV
814	P15586	N-acetylglucosamine-6-sulfatase	62	2799	GNS	x	x	Tot Ext MV
815	Q08379	Golgin subfamily A member 2	113	2801	GOLGA2	x	x	Tot Ext MV
816	Q08378	Golgin subfamily A member 3	167.3	2802	GOLGA3	x	x	Tot Ext MV
817	Q13439-1	Golgin subfamily A member 4	261	2803	GOLGA4		x	Tot Ext MV
818	Q9H8Y8-1	Golgi reassembly-stacking protein 2	47.1	26003	GORASP2	x	x	Tot Ext MV
819	O14653-1	Golgi SNAP receptor complex member 2	24.8	9570	GOSR2		x	Tot Ext MV
820	O43292-1	Glycosylphosphatidylinositol anchor attachment 1 protein	67.6	8733	GPAA1		x	Tot Ext MV
821	P43304	Glycerol-3-phosphate dehydrogenase, mitochondrial	80.8	2820	GPD2		x	Tot Ext MV
822	Q4V328	GRIP1-associated protein 1	95.9	56850	GRIPAP1	x	x	Tot Ext MV
823	Q9HAV7	GrpE protein homolog 1, mitochondrial	24.3	80273	GRPEL1		x	Tot Ext MV
824	Q12849	G-rich sequence factor 1	53.1	2926	GRSF1		x	Tot Ext MV
825	P35269	General transcription factor iif subunit 1	58.2	2962	GTF2F1	x	x	Tot Ext MV
826	Q9UKN8	General transcription factor 3C polypeptide 4	91.9	9329	GTF3C4		x	Tot Ext MV
827	Q9BZE4	Nucleolar GTP-binding protein 1	73.9	23560	GTPBP4	x	x	Tot Ext MV
828	Q16774-1	guanylate kinase	21.7	2987	GUK1	x	x	Tot Ext MV
829	P08236	beta-glucuronidase	74.7	2990	GUSB	x	x	Tot Ext MV
830	P51124	Granzyme M	27.5	3004	GZMM		x	Tot Ext MV
831	P40939	Trifunctional enzyme subunit alpha, mitochondrial	82.9	3030	HADHA	x	x	Tot Ext MV
832	P55084	Trifunctional enzyme subunit beta, mitochondrial	51.3	3032	HADHB	x	x	Tot Ext MV
833	P51858	hepatoma-derived growth factor	26.8	3068	HDGF	x	x	Tot Ext MV
834	Q7Z4V5	Hepatoma-derived growth factor-related protein 2	74.3	84717	HDGFRP2; HDGFL2			Tot Ext MV
835	Q08623	Pseudouridine-5'-phosphatase	25.2	8226	HDHD1; PUDP			Tot Ext MV
836	Q7Z4Q2	HEAT repeat-containing protein 3	74.5	55027	HEATR3		x	Tot Ext MV
837	Q8NDA8-1	Maestro heat-like repeat-containing protein family member 1	181.1	727957	HEATR7A; MROH1			Tot Ext MV
838	Q9BYK8-1	Helicase with zinc finger domain 2	294.5	85441	HELZ2			Tot Ext MV
839	Q9UII4	E3 ISG15--protein ligase HERC5	116.8	51191	HERC5	x	x	Tot Ext MV
840	Q8IVU3-1	Probable E3 ubiquitin-protein ligase HERC6	115.1	55008	HERC6		x	Tot Ext MV
841	P06865	Beta-hexosaminidase subunit alpha	60.7	3073	HEXA	x	x	Tot Ext MV
842	P31937	3-hydroxyisobutyrate dehydrogenase, mitochondrial	35.3	11112	HIBADH		x	Tot Ext MV
843	P52789	Hexokinase-2	102.3	3099	HK2		x	Tot Ext MV
844	P30462	HLA class I histocompatibility antigen, B-14 alpha chain	40.3	3106	HLA-B	x	x	Tot Ext MV
845	Q8TCT9-1	Minor histocompatibility antigen H13	41.5	81502	HM13	x	x	Tot Ext MV
846	P35914	Hydroxymethylglutaryl-CoA lyase, mitochondrial	34.3	3155	HMGCL		x	Tot Ext MV
847	P30519	Heme oxygenase 2	36	3163	HMOX2	x	x	Tot Ext MV
848	P07910-1	Heterogeneous nuclear ribonucleoproteins C1/C2	33.7	3183	HNRNPC	x	x	Tot Ext MV
849	O43390-2	Isoform 2 of Heterogeneous nuclear ribonucleoprotein R	71.2	10236	HNRNPR	x	x	Tot Ext MV
850	Q8NBQ5	Estradiol 17-beta-dehydrogenase 11	32.9	51170	HSD17B11		x	Tot Ext MV
851	Q6YN16	Hydroxysteroid dehydrogenase-like protein 2	45.4	84263	HSDL2	x	x	Tot Ext MV
852	Q2TAA2	Isoamyl acetate-hydrolyzing esterase 1 homolog	27.6	285148	IAH1		x	Tot Ext MV
853	Q9NSE4	Isoleucine--tRNA ligase, mitochondrial	113.7	55699	IARS2		x	Tot Ext MV
854	P13598	Intercellular adhesion molecule 2	30.6	3384	ICAM2	x	x	Tot Ext MV
855	O60725	protein-s-isoprenylcysteine O-methyltransferase	31.9	23463	ICMT		x	Tot Ext MV
856	Q14197	Peptidyl-tRNA hydrolase ICT1, mitochondrial	23.6	3396	ICT1; MRPL58			Tot Ext MV
857	O43837-1	isocitrate dehydrogenase [NAD] subunit beta, mitochondrial	42.2	3420	IDH3B	x	x	Tot Ext MV
858	P51553-1	isocitrate dehydrogenase [NAD] subunit gamma, mitochondrial	42.8	3421	IDH3G		x	Tot Ext MV
859	Q53G44	Interferon-induced protein 44-like	51.3	10964	IFI44L		x	Tot Ext MV
860	Q9BYX4-1	Interferon-induced helicase C domain-containing protein 1	116.6	64135	IFIH1		x	Tot Ext MV
861	O14879	Interferon-induced protein with tetratricopeptide repeats 3	56	3437	IFIT3	x	x	Tot Ext MV
862	Q9BW83-1	Intraflagellar transport protein 27 homolog	20.5	11020	IFT27	x	x	Tot Ext MV
863	P78318	Immunoglobulin-binding protein 1	39.2	3476	IGBP1		x	Tot Ext MV
864	Q70UQ0	Inhibitor of nuclear factor kappa-B kinase-interacting protein	39.3	121457	IKBIP		x	Tot Ext MV
865	A1L0T0	Acetolactate synthase-like protein	67.8	10994	ILVBL		x	Tot Ext MV
866	Q16891-2	Isoform 2 of MICOS complex subunit MIC60	82.6	10989	IMMT	x	x	Tot Ext MV
867	Q27J81	Inverted formin-2	135.5	64423	INF2	x	x	Tot Ext MV
868	P32019-1	Type II inositol 1,4,5-trisphosphate 5-phosphatase	112.8	3633	INPP5B	x	x	Tot Ext MV
869	O15357	Phosphatidylinositol 3,4,5-trisphosphate 5-phosphatase 2	138.5	3636	INPPL1	x	x	Tot Ext MV
870	Q68E01	Integrator complex subunit 3	118	65123	INTS3	x	x	Tot Ext MV
871	Q6P9B9	Integrator complex subunit 5	107.9	80789	INTS5		x	Tot Ext MV
872	Q9UI26	Importin-11	112.5	51194	IPO11	x	x	Tot Ext MV
873	O94829	Importin-13	108.1	9670	IPO13		x	Tot Ext MV
874	Q9NWZ3-1	Interleukin-1 receptor-associated kinase 4	51.5	51135	IRAK4		x	Tot Ext MV
875	Q15306	Interferon regulatory factor 4	51.7	3662	IRF4		x	Tot Ext MV
876	Q96AB3	isochorismatase domain-containing protein 2	22.3	79763	ISOC2		x	Tot Ext MV
877	Q9NPH2	Inositol-3-phosphate synthase 1	61	51477	ISYNA1	x	x	Tot Ext MV
878	Q14643-1	Inositol 1,4,5-trisphosphate receptor type 1	313.7	3708	ITPR1		x	Tot Ext MV
879	Q14571-1	Inositol 1,4,5-trisphosphate receptor type 2	307.9	3709	ITPR2	x	x	Tot Ext MV
880	P26440	Isovaleryl-CoA dehydrogenase, mitochondrial	46.3	3712	IVD		x	Tot Ext MV
881	Q96ST2	protein IWS1 homolog	91.9	55677	IWS1		x	Tot Ext MV
882	Q8N5M9	Protein jagunal homolog 1	21.1	84522	JAGN1		x	Tot Ext MV
883	Q06136	3-ketodihydrosphingosine reductase	36.2	2531	KDSR		x	Tot Ext MV
884	Q96EK5	KIF1-binding protein	71.8	26128	KIAA1279; KIF1BP			Tot Ext MV
885	Q8TCG1	Protein CIP2A	102.1	57650	KIAA1524; CIP2A			Tot Ext MV
886	Q9NS87	Kinesin-like protein KIF15	160.1	56992	KIF15	x	x	Tot Ext MV
887	Q7Z4S6-1	Kinesin-like protein KIF21A	187.1	55605	KIF21A	x	x	Tot Ext MV
888	Q99661-1	Kinesin-like protein KIF2C	81.3	11004	KIF2C		x	Tot Ext MV
889	O95239-1	Chromosome-associated kinesin KIF4A	139.8	24137	KIF4A	x	x	Tot Ext MV
890	Q92845	Kinesin-associated protein 3	91.1	22920	KIFAP3		x	Tot Ext MV
891	Q9BW19	Kinesin-like protein KIFC1	73.7	3833	KIFC1	x	x	Tot Ext MV
892	Q8TBB5	kelch domain-containing protein 4	57.9	54758	KLHDC4		x	Tot Ext MV
893	Q9H9P8-1	L-2-hydroxyglutarate dehydrogenase, mitochondrial	50.3	79944	L2HGDH		x	Tot Ext MV
894	P83111-1	Serine beta-lactamase-like protein LACTB, mitochondrial	60.7	114294	LACTB		x	Tot Ext MV
895	Q53H82	Endoribonuclease LACTB2	32.8	51110	LACTB2		x	Tot Ext MV
896	Q92615	la-related protein 4B	80.5	23185	LARP4B	x	x	Tot Ext MV
897	Q4G0J3	La-related protein 7	66.9	51574	LARP7	x	x	Tot Ext MV
898	Q15031	Probable Leucine--tRNA ligase, mitochondrial	101.9	23395	LARS2		x	Tot Ext MV
899	Q9UIC8	leucine carboxyl methyltransferase 1	38.4	51451	LCMT1	x	x	Tot Ext MV
900	Q8NC56-1	LEM domain-containing protein 2	56.9	221496	LEMD2		x	Tot Ext MV
901	O95202-1	mitochondrial proton/calcium exchanger protein	83.3	3954	LETM1	x	x	Tot Ext MV
902	Q9BU23-1	Lipase maturation factor 2	79.6	91289	LMF2		x	Tot Ext MV
903	P02545-2	Isoform C of Prelamin-A/C	65.1	4000	LMNA	x	x	Tot Ext MV
904	O96011-1	Peroxisomal membrane protein 11B	28.4	8799	LOC101060567; PEX11B			Tot Ext MV
905	P36776	Lon protease homolog, mitochondrial	106.4	9361	LONP1	x	x	Tot Ext MV
906	Q6P1A2	Lysophospholipid acyltransferase 5	56	10162	LPCAT3	x	x	Tot Ext MV
907	Q9Y2L9-1	Leucine-rich repeat and calponin homology domain-containing protein 1	80.8	23143	LRCH1		x	Tot Ext MV
908	Q96II8-1	Leucine-rich repeat and calponin homology domain-containing protein 3	86	84859	LRCH3		x	Tot Ext MV
909	Q9H9A6	Leucine-rich repeat-containing protein 40	68.2	55631	LRRC40		x	Tot Ext MV
910	Q96AG4	Leucine-rich repeat-containing protein 59	34.9	55379	LRRC59	x	x	Tot Ext MV
911	Q32MZ4	Leucine-rich repeat flightless-interacting protein 1	89.2	9208	LRRFIP1	x	x	Tot Ext MV
912	Q6UWE0	E3 ubiquitin-protein ligase LRSAM1	83.5	90678	LRSAM1	x	x	Tot Ext MV
913	O94822	E3 ubiquitin-protein ligase listerin	200.4	26046	LTN1	x	x	Tot Ext MV
914	Q9UPN3-3	Isoform 3 of Microtubule-actin cross-linking factor 1, isoforms 1/2/3/5	613.8	23499	MACF1	x	x	Tot Ext MV
915	Q9H0U3	Magnesium transporter protein 1	38	84061	MAGT1	x	x	Tot Ext MV
916	Q9UDY8	Mucosa-associated lymphoid tissue lymphoma translocation protein 1	92.2	10892	MALT1	x	x	Tot Ext MV
917	O60476	mannosyl-oligosaccharide 1,2-alpha-mannosidase IB	73	10905	MAN1A2	x	x	Tot Ext MV
918	Q9NTJ4-1	alpha-mannosidase 2C1	115.8	4123	MAN2C1		x	Tot Ext MV
919	P52564-1	Dual specificity mitogen-activated protein kinase kinase 6	37.5	5608	MAP2K6	x	x	Tot Ext MV
920	O14733	dual specificity mitogen-activated protein kinase kinase 7	47.5	5609	MAP2K7	x	x	Tot Ext MV
921	Q3KQU3	MAP7 domain-containing protein 1	92.8	55700	MAP7D1		x	Tot Ext MV
922	P45983-1	Mitogen-activated protein kinase 8	48.3	5599	MAPK8	x	x	Tot Ext MV
923	Q16644	MAP kinase-activated protein kinase 3	43	7867	MAPKAPK3		x	Tot Ext MV
924	Q9NX47	E3 ubiquitin-protein ligase MARCH5	31.2	54708	MARCH5			Tot Ext MV
925	Q9UBB5-1	Methyl-CpG-binding domain protein 2	43.2	8932	MBD2		x	Tot Ext MV
926	O95983-1	methyl-CpG-binding domain protein 3	32.8	53615	MBD3	x	x	Tot Ext MV
927	Q9NR56-5	Isoform 5 of Muscleblind-like protein 1	41	4154	MBNL1	x	x	Tot Ext MV
928	Q96N66-1	Lysophospholipid acyltransferase 7	52.7	79143	MBOAT7		x	Tot Ext MV
929	Q96RQ3	Methylcrotonoyl-CoA carboxylase subunit alpha, mitochondrial	80.4	56922	MCCC1	x	x	Tot Ext MV
930	Q9HCC0-1	Methylcrotonoyl-CoA carboxylase beta chain, mitochondrial	61.3	64087	MCCC2		x	Tot Ext MV
931	Q6DN12-1	Multiple C2 and transmembrane domain-containing protein 2	99.5	55784	MCTP2		x	Tot Ext MV
932	Q8NE86	Calcium uniporter protein, mitochondrial	39.8	90550	MCU		x	Tot Ext MV
933	Q9BV79	Enoyl-[acyl-carrier-protein] reductase, mitochondrial	40.4	51102	MECR		x	Tot Ext MV
934	P53582	Methionine aminopeptidase 1	43.2	23173	METAP1		x	Tot Ext MV
935	Q86W50-1	U6 small nuclear RNA (adenine-(43)-N(6))-methyltransferase	63.6	79066	METTL16	x	x	Tot Ext MV
936	Q14728	Major facilitator superfamily domain-containing protein 10	48.3	10227	MFSD10		x	Tot Ext MV
937	Q6ZSS7	Major facilitator superfamily domain-containing protein 6	88	54842	MFSD6		x	Tot Ext MV
938	P16455	Methylated-DNA--protein-cysteine methyltransferase	21.6	4255	MGMT	x	x	Tot Ext MV
939	O14880	Microsomal glutathione S-transferase 3	16.5	4259	MGST3	x	x	Tot Ext MV
940	Q99797	Mitochondrial intermediate peptidase	80.6	4285	MIPEP		x	Tot Ext MV
941	P40692-1	DNA mismatch repair protein MLH1	84.5	4292	MLH1	x	x	Tot Ext MV
942	Q8NB16	Mixed lineage kinase domain-like protein	54.4	197259	MLKL		x	Tot Ext MV
943	P55196-1	Isoform 2 of Afadin	205.5	4301	MLLT4; AFDN			Tot Ext MV
944	Q96EY8	Cob(I)yrinic acid a,c-diamide adenosyltransferase, mitochondrial	27.4	326625	MMAB	x	x	Tot Ext MV
945	P14780	Matrix metalloproteinase-9	78.4	4318	MMP9	x	x	Tot Ext MV
946	P34949	mannose-6-phosphate isomerase	46.6	4351	MPI	x	x	Tot Ext MV
947	P49959	Double-strand break repair protein MRE11	80.5	4361	MRE11A; MRE11			Tot Ext MV
948	Q9BYD6	39S ribosomal protein L1, mitochondrial	36.9	65008	MRPL1		x	Tot Ext MV
949	Q7Z7H8	39S ribosomal protein L10, mitochondrial	29.3	124995	MRPL10		x	Tot Ext MV
950	Q9BYD1	39S ribosomal protein L13, mitochondrial	20.7	28998	MRPL13		x	Tot Ext MV
951	Q9P015	39S ribosomal protein L15, mitochondrial	33.4	29088	MRPL15		x	Tot Ext MV
952	Q9NRX2	39S ribosomal protein L17, mitochondrial	20	63875	MRPL17		x	Tot Ext MV
953	Q9H0U6	39S ribosomal protein L18, mitochondrial	20.6	29074	MRPL18	x	x	Tot Ext MV
954	P49406	39S ribosomal protein L19, mitochondrial	33.5	9801	MRPL19		x	Tot Ext MV
955	Q5T653	39S ribosomal protein L2, mitochondrial	33.3	51069	MRPL2	x	x	Tot Ext MV
956	Q7Z2W9	39S ribosomal protein L21, mitochondrial	22.8	219927	MRPL21		x	Tot Ext MV
957	Q16540	39S ribosomal protein L23, mitochondrial	17.8	6150	MRPL23		x	Tot Ext MV
958	Q96A35	39S ribosomal protein L24, mitochondrial	24.9	79590	MRPL24		x	Tot Ext MV
959	Q13084	39S ribosomal protein L28, mitochondrial	30.1	10573	MRPL28	x	x	Tot Ext MV
960	P09001	39S ribosomal protein L3, mitochondrial	38.6	11222	MRPL3		x	Tot Ext MV
961	Q9BZE1	39S ribosomal protein L37, mitochondrial	48.1	51253	MRPL37		x	Tot Ext MV
962	Q96DV4	39S ribosomal protein L38, mitochondrial	44.6	64978	MRPL38		x	Tot Ext MV
963	Q9NYK5-1	39S ribosomal protein L39, mitochondrial	38.7	54148	MRPL39		x	Tot Ext MV
964	Q9BYD3	39S ribosomal protein L4, mitochondrial	34.9	51073	MRPL4		x	Tot Ext MV
965	Q9NQ50	39S ribosomal protein L40, mitochondrial	24.5	64976	MRPL40		x	Tot Ext MV
966	Q8N983	39S ribosomal protein L43, mitochondrial	23.4	84545	MRPL43		x	Tot Ext MV
967	Q9H9J2	39S ribosomal protein L44, mitochondrial	37.5	65080	MRPL44		x	Tot Ext MV
968	Q9BRJ2	39S ribosomal protein L45, mitochondrial	35.3	84311	MRPL45	x	x	Tot Ext MV
969	Q9H2W6	39S ribosomal protein L46, mitochondrial	31.7	26589	MRPL46		x	Tot Ext MV
970	Q9HD33-1	39S ribosomal protein L47, mitochondrial	29.4	57129	MRPL47		x	Tot Ext MV
971	Q96GC5-1	39S ribosomal protein L48, mitochondrial	23.9	51642	MRPL48		x	Tot Ext MV
972	Q13405	39S ribosomal protein L49, mitochondrial	19.2	740	MRPL49		x	Tot Ext MV
973	Q9BYD2	39S ribosomal protein L9, mitochondrial	30.2	65005	MRPL9		x	Tot Ext MV
974	P82664	28S ribosomal protein S10, mitochondrial	23	55173	MRPS10		x	Tot Ext MV
975	P82912-1	28S ribosomal protein S11, mitochondrial	20.6	64963	MRPS11		x	Tot Ext MV
976	P82914	28S ribosomal protein S15, mitochondrial	29.8	64960	MRPS15		x	Tot Ext MV
977	Q9Y2R5	28S ribosomal protein S17, mitochondrial	14.5	51373	MRPS17	x	x	Tot Ext MV
978	Q9Y676	28S ribosomal protein S18b, mitochondrial	29.4	28973	MRPS18B		x	Tot Ext MV
979	Q9Y399	28S ribosomal protein S2, mitochondrial	33.2	51116	MRPS2		x	Tot Ext MV
980	P82650	28S ribosomal protein S22, mitochondrial	41.3	56945	MRPS22	x	x	Tot Ext MV
981	Q9Y3D9	28S ribosomal protein S23, mitochondrial	21.8	51649	MRPS23		x	Tot Ext MV
982	P82663	28S ribosomal protein S25, mitochondrial	20.1	64432	MRPS25		x	Tot Ext MV
983	Q9BYN8	28S ribosomal protein S26, mitochondrial	24.2	64949	MRPS26		x	Tot Ext MV
984	Q92552	28S ribosomal protein S27, mitochondrial	47.6	23107	MRPS27		x	Tot Ext MV
985	Q9Y2Q9	28S ribosomal protein S28, mitochondrial	20.8	28957	MRPS28		x	Tot Ext MV
986	Q9NP92	39S ribosomal protein S30, mitochondrial	50.3	10884	MRPS30		x	Tot Ext MV
987	Q92665	28S ribosomal protein S31, mitochondrial	45.3	10240	MRPS31		x	Tot Ext MV
988	P82930	28S ribosomal protein S34, mitochondrial	25.6	65993	MRPS34		x	Tot Ext MV
989	P82673-1	28S ribosomal protein S35, mitochondrial	36.8	60488	MRPS35		x	Tot Ext MV
990	P82675	28S ribosomal protein S5, mitochondrial	48	64969	MRPS5		x	Tot Ext MV
991	Q9Y2R9	28S ribosomal protein S7, mitochondrial	28.1	51081	MRPS7		x	Tot Ext MV
992	P82933	28S ribosomal protein S9, mitochondrial	45.8	64965	MRPS9		x	Tot Ext MV
993	Q96E11	Ribosome-recycling factor, mitochondrial	29.3	92399	MRRF		x	Tot Ext MV
994	Q13330-1	Metastasis-associated protein MTA1	80.7	9112	MTA1		x	Tot Ext MV
995	Q9Y6C9	Mitochondrial carrier homolog 2	33.3	23788	MTCH2	x	x	Tot Ext MV
996	Q86UE4	protein LYRIC	63.8	92140	MTDH		x	Tot Ext MV
997	Q9UDX5	Mitochondrial fission process protein 1	18	51537	MTFP1		x	Tot Ext MV
998	Q6UB35-1	Monofunctional C1-tetrahydrofolate synthase, mitochondrial	105.7	25902	MTHFD1L	x	x	Tot Ext MV
999	P13995	Bifunctional methylenetetrahydrofolate dehydrogenase/cyclohydrolase, mitochondrial	37.9	10797	MTHFD2	x	x	Tot Ext MV
1000	P49914	5-formyltetrahydrofolate cyclo-ligase	23.2	10588	MTHFS		x	Tot Ext MV
1001	Q13496	Myotubularin	69.9	4534	MTM1		x	Tot Ext MV
1002	Q13613-1	Myotubularin-related protein 1	74.6	8776	MTMR1		x	Tot Ext MV
1003	Q9NVV4-2	Isoform 2 of Poly(A) RNA polymerase, mitochondrial	78.8	55149	MTPAP		x	Tot Ext MV
1004	Q99707	methionine synthase	140.4	4548	MTR		x	Tot Ext MV
1005	Q13505-1	Metaxin-1	51.4	4580	MTX1		x	Tot Ext MV
1006	O75431	Metaxin-2	29.7	10651	MTX2		x	Tot Ext MV
1007	P22033	Methylmalonyl-CoA mutase, mitochondrial	83.1	4594	MUT		x	Tot Ext MV
1008	Q03426	mevalonate kinase	42.4	4598	MVK	x	x	Tot Ext MV
1009	P20592	interferon-induced GTP-binding protein Mx2	82	4600	MX2	x	x	Tot Ext MV
1010	Q14CX7-1	N-alpha-acetyltransferase 25, NatB auxiliary subunit	112.2	80018	NAA25		x	Tot Ext MV
1011	Q9BZK3	Putative nascent polypeptide-associated complex subunit alpha-like protein	23.3	83955	NACAP1		x	Tot Ext MV
1012	P54802	alpha-N-acetylglucosaminidase	82.2	4669	NAGLU	x	x	Tot Ext MV
1013	Q6XQN6-1	nicotinate phosphoribosyltransferase	57.5	93100	NAPRT1; NAPRT			Tot Ext MV
1014	Q96I59	probable asparagine--tRNA ligase, mitochondrial	54.1	79731	NARS2		x	Tot Ext MV
1015	P13591-1	Isoform 2 of Neural cell adhesion molecule 1	93.3	4684	NCAM1	x	x	Tot Ext MV
1016	P42695	condensin-2 complex subunit D3	168.8	23310	NCAPD3	x	x	Tot Ext MV
1017	Q86XI2-1	condensin-2 complex subunit G2	130.9	54892	NCAPG2	x	x	Tot Ext MV
1018	Q9UBB6	Neurochondrin	78.8	23154	NCDN		x	Tot Ext MV
1019	Q15080-1	Neutrophil cytosol factor 4	39	4689	NCF4	x	x	Tot Ext MV
1020	Q969V3	Nicalin	62.9	56926	NCLN		x	Tot Ext MV
1021	O95299	NADH dehydrogenase [ubiquinone] 1 alpha subcomplex subunit 10, mitochondrial	40.7	4705	NDUFA10		x	Tot Ext MV
1022	Q9UI09	NADH dehydrogenase [ubiquinone] 1 alpha subcomplex subunit 12	17.1	55967	NDUFA12		x	Tot Ext MV
1023	Q16795	NADH dehydrogenase [ubiquinone] 1 alpha subcomplex subunit 9, mitochondrial	42.5	4704	NDUFA9		x	Tot Ext MV
1024	Q9Y375	Complex I intermediate-associated protein 30, mitochondrial	37.7	51103	NDUFAF1		x	Tot Ext MV
1025	Q8N183	NADH dehydrogenase [ubiquinone] 1 alpha subcomplex assembly factor 2	19.8	91942	NDUFAF2		x	Tot Ext MV
1026	Q9BU61-1	NADH dehydrogenase [ubiquinone] 1 alpha subcomplex assembly factor 3	20.3	25915	NDUFAF3		x	Tot Ext MV
1027	Q9P032	NADH dehydrogenase [ubiquinone] 1 alpha subcomplex assembly factor 4	20.3	29078	NDUFAF4		x	Tot Ext MV
1028	O96000	NADH dehydrogenase [ubiquinone] 1 beta subcomplex subunit 10	20.8	4716	NDUFB10		x	Tot Ext MV
1029	O43674-1	NADH dehydrogenase [ubiquinone] 1 beta subcomplex subunit 5, mitochondrial	21.7	4711	NDUFB5		x	Tot Ext MV
1030	O95139	NADH dehydrogenase [ubiquinone] 1 beta subcomplex subunit 6	15.5	4712	NDUFB6		x	Tot Ext MV
1031	P17568	NADH dehydrogenase [ubiquinone] 1 beta subcomplex subunit 7	16.4	4713	NDUFB7	x	x	Tot Ext MV
1032	O95169	NADH dehydrogenase [ubiquinone] 1 beta subcomplex subunit 8, mitochondrial	21.8	4714	NDUFB8		x	Tot Ext MV
1033	Q9Y6M9	NADH dehydrogenase [ubiquinone] 1 beta subcomplex subunit 9	21.8	4715	NDUFB9		x	Tot Ext MV
1034	P28331-1	NADH-ubiquinone oxidoreductase 75 kDa subunit, mitochondrial	79.4	4719	NDUFS1		x	Tot Ext MV
1035	O75306-1	NADH dehydrogenase [ubiquinone] iron-sulfur protein 2, mitochondrial	52.5	4720	NDUFS2	x	x	Tot Ext MV
1036	O43181	NADH dehydrogenase [ubiquinone] iron-sulfur protein 4, mitochondrial	20.1	4724	NDUFS4		x	Tot Ext MV
1037	O75251	NADH dehydrogenase [ubiquinone] iron-sulfur protein 7, mitochondrial	23.5	374291	NDUFS7		x	Tot Ext MV
1038	P19404	NADH dehydrogenase [ubiquinone] flavoprotein 2, mitochondrial	27.4	4729	NDUFV2		x	Tot Ext MV
1039	P21359-1	Neurofibromin	319.2	4763	NF1	x	x	Tot Ext MV
1040	Q6KC79	Nipped-B-like protein	315.9	25836	NIPBL	x	x	Tot Ext MV
1041	Q9UFN0	protein NipSnap homolog 3A	28.4	25934	NIPSNAP3A		x	Tot Ext MV
1042	Q9BYT8	Neurolysin, mitochondrial	80.6	57486	NLN		x	Tot Ext MV
1043	Q7RTR2-1	NLR family CARD domain-containing protein 3	114.6	197358	NLRC3			Tot Ext MV
1044	Q9NX02	NACHT, LRR and PYD domains-containing protein 2	120.4	55655	NLRP2		x	Tot Ext MV
1045	Q9NWW6-1	Nicotinamide riboside kinase 1	23.2	54981	NMRK1		x	Tot Ext MV
1046	Q13423	NAD(P) transhydrogenase, mitochondrial	113.8	23530	NNT		x	Tot Ext MV
1047	Q9ULX3	RNA-binding protein NOB1	46.6	28987	NOB1		x	Tot Ext MV
1048	Q9Y3T9	Nucleolar complex protein 2 homolog	84.9	26155	NOC2L		x	Tot Ext MV
1049	Q8WTT2	Nucleolar complex protein 3 homolog	92.5	64318	NOC3L		x	Tot Ext MV
1050	Q9BVI4	Nucleolar complex protein 4 homolog	58.4	79050	NOC4L		x	Tot Ext MV
1051	Q5JPE7	NODAL modulator 2	139.4	283820	NOMO2	x	x	Tot Ext MV
1052	Q9Y314	nitric oxide synthase-interacting protein	33.2	51070	NOSIP		x	Tot Ext MV
1053	O15118	Niemann-Pick C1 protein	142.1	4864	NPC1	x	x	Tot Ext MV
1054	P61916	Epididymal secretory protein E1	16.6	10577	NPC2		x	Tot Ext MV
1055	P15559-1	NAD(P)H dehydrogenase [quinone] 1	30.8	1728	NQO1	x	x	Tot Ext MV
1056	Q9UHY1	Nuclear receptor-binding protein	59.8	29959	NRBP1		x	Tot Ext MV
1057	Q16656-1	Nuclear respiratory factor 1	53.5	4899	NRF1	x	x	Tot Ext MV
1058	Q8IXM6-1	Nurim	29.4	11270	NRM		x	Tot Ext MV
1059	Q15738	sterol-4-alpha-carboxylate 3-dehydrogenase, decarboxylating	41.9	50814	NSDHL	x	x	Tot Ext MV
1060	Q9H0P0-4	Cytosolic 5'-nucleotidase 3A	37.9	51251	NT5C3; NT5C3A			Tot Ext MV
1061	P80303	Nucleobindin-2	50.2	4925	NUCB2	x	x	Tot Ext MV
1062	P36639	7,8-dihydro-8-oxoguanine triphosphatase	22.5	4521	NUDT1		x	Tot Ext MV
1063	A8MXV4	nucleoside diphosphate-linked moiety X motif 19	42.2	390916	NUDT19		x	Tot Ext MV
1064	Q8WUM0	Nuclear pore complex protein Nup133	128.9	55746	NUP133		x	Tot Ext MV
1065	O75694	nuclear pore complex protein nup155	155.1	9631	NUP155		x	Tot Ext MV
1066	Q12769	nuclear pore complex protein Nup160	162	23279	NUP160	x	x	Tot Ext MV
1067	Q5SRE5	Nucleoporin NUP188 homolog	195.9	23511	NUP188	x	x	Tot Ext MV
1068	Q8TEM1-1	Nuclear pore membrane glycoprotein 210	205	23225	NUP210	x	x	Tot Ext MV
1069	P35658-1	Nuclear pore complex protein Nup214	213.5	8021	NUP214		x	Tot Ext MV
1070	P37198	nuclear pore glycoprotein p62	53.2	23636	NUP62	x	x	Tot Ext MV
1071	P52948-1	nuclear pore complex protein Nup98-Nup96	197.5	4928	NUP98	x	x	Tot Ext MV
1072	P04181-1	Ornithine aminotransferase, mitochondrial	48.5	4942	OAT	x	x	Tot Ext MV
1073	Q02218	2-oxoglutarate dehydrogenase, mitochondrial	115.9	4967	OGDH		x	Tot Ext MV
1074	Q9NZT2-1	opioid growth factor receptor	73.3	11054	OGFR	x	x	Tot Ext MV
1075	O15294	UDP-N-acetylglucosamine--peptide N-acetylglucosaminyltransferase 110 kDa subunit	116.9	8473	OGT	x	x	Tot Ext MV
1076	Q9H6K4	Optic atrophy 3 protein	20	80207	OPA3	x	x	Tot Ext MV
1077	Q9UBD5-1	Origin recognition complex subunit 3	82.2	23595	ORC3		x	Tot Ext MV
1078	O43929	origin recognition complex subunit 4	50.3	5000	ORC4		x	Tot Ext MV
1079	Q13438-1	Protein os-9	75.5	10956	OS9	x	x	Tot Ext MV
1080	Q9H4L5	Oxysterol-binding protein-related protein 3	101.2	26031	OSBPL3		x	Tot Ext MV
1081	Q15070-1	Mitochondrial inner membrane protein OXA1L	48.5	5018	OXA1L		x	Tot Ext MV
1082	Q99571	P2X purinoceptor 4	43.3	5025	P2RX4	x	x	Tot Ext MV
1083	Q9H074	Polyadenylate-binding protein-interacting protein 1	53.5	10605	PAIP1		x	Tot Ext MV
1084	Q9BPZ3	Polyadenylate-binding protein-interacting protein 2	15	51247	PAIP2		x	Tot Ext MV
1085	Q9NVE7	pantothenate kinase 4	85.9	55229	PANK4	x	x	Tot Ext MV
1086	Q53GL7	Poly [ADP-ribose] polymerase 10	109.9	84875	PARP10	x	x	Tot Ext MV
1087	Q8IXQ6-2	Isoform 2 of Poly [ADP-ribose] polymerase 9	92.2	83666	PARP9	x	x	Tot Ext MV
1088	Q96KB5	Lymphokine-activated killer T-cell-originated protein kinase	36.1	55872	PBK		x	Tot Ext MV
1089	Q86U86-1	Protein polybromo-1	192.8	55193	PBRM1	x	x	Tot Ext MV
1090	Q96AQ6	Pre-B-cell leukemia transcription factor-interacting protein 1	80.6	57326	PBXIP1		x	Tot Ext MV
1091	Q15366-1	Poly(rC)-binding protein 2	38.6	5094	PCBP2	x	x	Tot Ext MV
1092	Q15366-3	Isoform 3 of Poly(rC)-binding protein 2	38.2	5094	PCBP2	x	x	Tot Ext MV
1093	P05165-1	Propionyl-CoA carboxylase alpha chain, mitochondrial	80	5095	PCCA		x	Tot Ext MV
1094	Q16822-1	Phosphoenolpyruvate carboxykinase [GTP], mitochondrial	70.7	5106	PCK2		x	Tot Ext MV
1095	Q8WW12	PEST proteolytic signal-containing nuclear protein	18.9	57092	PCNP		x	Tot Ext MV
1096	Q8NBM8	Prenylcysteine oxidase-like	54.6	78991	PCYOX1L	x	x	Tot Ext MV
1097	P49585	choline-phosphate cytidylyltransferase A	41.7	5130	PCYT1A		x	Tot Ext MV
1098	Q14690	Protein RRP5 homolog	208.6	22984	PDCD11		x	Tot Ext MV
1099	Q6L8Q7-1	2',5'-phosphodiesterase 12	67.3	201626	PDE12	x	x	Tot Ext MV
1100	O43924	Retinal rod rhodopsin-sensitive cGMP 3',5'-cyclic phosphodiesterase subunit delta	17.4	5147	PDE6D		x	Tot Ext MV
1101	P08559	Pyruvate dehydrogenase E1 component subunit alpha, somatic form, mitochondrial	43.3	5160	PDHA1	x	x	Tot Ext MV
1102	O00330-1	Pyruvate dehydrogenase protein X component, mitochondrial	54.1	8050	PDHX		x	Tot Ext MV
1103	Q15120-1	[Pyruvate dehydrogenase (acetyl-transferring)] kinase isozyme 3, mitochondrial	46.9	5165	PDK3		x	Tot Ext MV
1104	Q9P0J1	[Pyruvate dehydrogenase [acetyl-transferring]]-phosphatase 1, mitochondrial	61	54704	PDP1		x	Tot Ext MV
1105	O15530-1	3-phosphoinositide-dependent protein kinase 1	63.1	5170	PDPK1		x	Tot Ext MV
1106	Q8NCN5	Pyruvate dehydrogenase phosphatase regulatory subunit, mitochondrial	99.3	55066	PDPR	x	x	Tot Ext MV
1107	Q29RF7-1	Sister chromatid cohesion protein PDS5 homolog A	150.7	23244	PDS5A	x	x	Tot Ext MV
1108	Q8IZL8	Proline-, glutamic acid- and leucine-rich protein 1	119.6	27043	PELP1	x	x	Tot Ext MV
1109	Q9Y5Y5	Peroxisomal membrane protein PEX16	38.6	9409	PEX16		x	Tot Ext MV
1110	P56589	Peroxisomal biogenesis factor 3	42.1	8504	PEX3	x	x	Tot Ext MV
1111	P53609	Geranylgeranyl transferase type-1 subunit beta	42.3	5229	PGGT1B		x	Tot Ext MV
1112	P07205	Phosphoglycerate kinase 2	44.8	5232	PGK2	x	x	Tot Ext MV
1113	O00264	Membrane-associated progesterone receptor component 1	21.7	10857	PGRMC1	x	x	Tot Ext MV
1114	Q8IWS0-1	PHD finger protein 6	41.3	84295	PHF6		x	Tot Ext MV
1115	Q93100-3	Isoform 3 of Phosphorylase b kinase regulatory subunit beta	124.7	5257	PHKB	x	x	Tot Ext MV
1116	Q96S52	GPI transamidase component PIG-S	61.6	94005	PIGS		x	Tot Ext MV
1117	Q969N2	GPI transamidase component PIG-T	65.7	51604	PIGT		x	Tot Ext MV
1118	Q9H490	Phosphatidylinositol glycan anchor biosynthesis class U protein	50	128869	PIGU		x	Tot Ext MV
1119	Q6ZUJ8	Phosphoinositide 3-kinase adapter protein 1	90.3	118788	PIK3AP1		x	Tot Ext MV
1120	Q8NEB9	Phosphatidylinositol 3-kinase catalytic subunit type 3	101.5	5289	PIK3C3	x	x	Tot Ext MV
1121	Q8TBX8-1	Phosphatidylinositol 5-phosphate 4-kinase type-2 gamma	47.3	79837	PIP4K2C	x	x	Tot Ext MV
1122	Q5JRX3	Presequence protease, mitochondrial	117.3	10531	PITRM1	x	x	Tot Ext MV
1123	Q13835	Plakophilin-1	82.8	5317	PKP1		x	Tot Ext MV
1124	Q00722	1-phosphatidylinositol 4,5-bisphosphate phosphodiesterase beta-2	133.9	5330	PLCB2		x	Tot Ext MV
1125	Q9UPR0-1	inactive phospholipase C-like protein 2	125.8	23228	PLCL2	x	x	Tot Ext MV
1126	Q9HB19	Pleckstrin homology domain-containing family A member 2	47.2	59339	PLEKHA2		x	Tot Ext MV
1127	O60664-1	Perilipin-3	47	10226	PLIN3	x	x	Tot Ext MV
1128	O60568	Procollagen-lysine,2-oxoglutarate 5-dioxygenase 3	84.7	8985	PLOD3	x	x	Tot Ext MV
1129	Q8IYS1	Peptidase M20 domain-containing protein 2	47.7	135293	PM20D2	x	x	Tot Ext MV
1130	O75439	mitochondrial-processing peptidase subunit beta	54.3	9512	PMPCB		x	Tot Ext MV
1131	Q8IY17-1	Neuropathy target esterase	149.9	10908	PNPLA6	x	x	Tot Ext MV
1132	Q8TCS8	Polyribonucleotide nucleotidyltransferase 1, mitochondrial	85.9	87178	PNPT1		x	Tot Ext MV
1133	Q9H488-1	GDP-fucose protein O-fucosyltransferase 1	43.9	23509	POFUT1		x	Tot Ext MV
1134	Q8NBL1	Protein O-glucosyltransferase 1	46.2	56983	POGLUT1		x	Tot Ext MV
1135	P28340	DNA polymerase delta catalytic subunit	123.6	5424	POLD1	x	x	Tot Ext MV
1136	Q9Y2S7	Polymerase delta-interacting protein 2	42	26073	POLDIP2		x	Tot Ext MV
1137	O00411	DNA-directed RNA polymerase, mitochondrial	138.5	5442	POLRMT	x	x	Tot Ext MV
1138	P16435	NADPH--cytochrome P450 reductase	76.6	5447	POR	x	x	Tot Ext MV
1139	Q9HAB8-1	phosphopantothenate--cysteine ligase	34	79717	PPCS		x	Tot Ext MV
1140	P30405	Peptidyl-prolyl cis-trans isomerase F, mitochondrial	22	10105	PPIF	x	x	Tot Ext MV
1141	Q9H2H8-1	peptidyl-prolyl cis-trans isomerase-like 3	18.1	53938	PPIL3		x	Tot Ext MV
1142	Q8WUA2	Peptidyl-prolyl cis-trans isomerase-like 4	57.2	85313	PPIL4		x	Tot Ext MV
1143	O75688	Protein phosphatase 1B	52.6	5495	PPM1B	x	x	Tot Ext MV
1144	P50336	protoporphyrinogen oxidase	50.7	5498	PPOX		x	Tot Ext MV
1145	P36873-1	serine/threonine-protein phosphatase PP1-gamma catalytic subunit	37	5501	PPP1CC	x	x	Tot Ext MV
1146	Q9BZL4	Protein phosphatase 1 regulatory subunit 12C	84.8	54776	PPP1R12C		x	Tot Ext MV
1147	Q6ZMI0-1	Protein phosphatase 1 regulatory subunit 21	88.3	129285	PPP1R21	x	x	Tot Ext MV
1148	P30154	Serine/threonine-protein phosphatase 2A 65 kDa regulatory subunit A beta isoform	66.2	5519	PPP2R1B	x	x	Tot Ext MV
1149	Q08209-1	Serine/threonine-protein phosphatase 2B catalytic subunit alpha isoform	58.7	5530	PPP3CA	x	x	Tot Ext MV
1150	P42785-1	lysosomal Pro-X carboxypeptidase	55.8	5547	PRCP	x	x	Tot Ext MV
1151	Q9HCU5	Prolactin regulatory element-binding protein	45.4	10113	PREB		x	Tot Ext MV
1152	Q8TCU6-1	Phosphatidylinositol 3,4,5-trisphosphate-dependent Rac exchanger 1 protein	186.1	57580	PREX1		x	Tot Ext MV
1153	Q13131	5'-AMP-activated protein kinase catalytic subunit alpha-1	64	5562	PRKAA1	x	x	Tot Ext MV
1154	P17252	Protein kinase C alpha type	76.7	5578	PRKCA	x	x	Tot Ext MV
1155	Q04759-1	Protein kinase C theta type	81.8	5588	PRKCQ	x	x	Tot Ext MV
1156	O75569-1	Interferon-inducible double-stranded RNA-dependent protein kinase activator A	34.4	8575	PRKRA	x	x	Tot Ext MV
1157	O60678	protein arginine N-methyltransferase 3	59.8	10196	PRMT3		x	Tot Ext MV
1158	O43395	U4/U6 small nuclear ribonucleoprotein Prp3	77.5	9129	PRPF3		x	Tot Ext MV
1159	Q5VTL8	Pre-mRNA-splicing factor 38B	64.4	55119	PRPF38B	x	x	Tot Ext MV
1160	O94906-1	Pre-mRNA-processing factor 6	106.9	24148	PRPF6	x	x	Tot Ext MV
1161	O75475-1	PC4 and SFRS1-interacting protein	60.1	11168	PSIP1	x	x	Tot Ext MV
1162	P55036-1	26S proteasome non-ATPase regulatory subunit 4	40.7	5710	PSMD4	x	x	Tot Ext MV
1163	Q8WXF1	Paraspeckle component 1	58.7	55269	PSPC1	x	x	Tot Ext MV
1164	Q96EY7-1	pentatricopeptide repeat domain-containing protein 3, mitochondrial	78.5	55037	PTCD3	x	x	Tot Ext MV
1165	P48651	phosphatidylserine synthase 1	55.5	9791	PTDSS1		x	Tot Ext MV
1166	Q14289-2	Isoform 2 of Protein-tyrosine kinase 2-beta	111.1	2185	PTK2B	x	x	Tot Ext MV
1167	Q9P035	Very-long-chain (3R)-3-hydroxyacyl-CoA dehydratase 3	43.1	51495	PTPLAD1; HACD3			Tot Ext MV
1168	Q6Y1H2	Very-long-chain (3R)-3-hydroxyacyl-CoA dehydratase 2	28.4	201562	PTPLB; HACD2			Tot Ext MV
1169	P29074	Tyrosine-protein phosphatase non-receptor type 4	105.8	5775	PTPN4		x	Tot Ext MV
1170	P23469	Receptor-type tyrosine-protein phosphatase epsilon	80.6	5791	PTPRE		x	Tot Ext MV
1171	Q9UHX1-2	Isoform 2 of Poly(U)-binding-splicing factor PUF60	58.1	22827	PUF60	x	x	Tot Ext MV
1172	Q9Y606	tRNA pseudouridine synthase A	47.4	80324	PUS1	x	x	Tot Ext MV
1173	Q96PZ0	pseudouridylate synthase 7 homolog	75	54517	PUS7		x	Tot Ext MV
1174	P32322	Pyrroline-5-carboxylate reductase 1, mitochondrial	33.3	5831	PYCR1		x	Tot Ext MV
1175	Q6WKZ4-4	Rab11 family-interacting protein 1	137.1	80223	RAB11FIP1	x	x	Tot Ext MV
1176	Q969Q5	Ras-related protein Rab-24	23.1	53917	RAB24		x	Tot Ext MV
1177	Q14088	Ras-related protein Rab-33A	26.6	9363	RAB33A	x	x	Tot Ext MV
1178	O14966-1	Ras-related protein Rab-7L1	23.1	8934	RAB7L1; RAB29			Tot Ext MV
1179	P53611	Geranylgeranyl transferase type-2 subunit beta	36.9	5876	RABGGTB		x	Tot Ext MV
1180	O60216	Double-strand-break repair protein rad21 homolog	71.6	5885	RAD21	x	x	Tot Ext MV
1181	Q86X10-1	Ral GTPase-activating protein subunit beta	166.7	57148	RALGAPB	x	x	Tot Ext MV
1182	O60518	ran-binding protein 6	124.6	26953	RANBP6		x	Tot Ext MV
1183	Q5T160	probable arginine--tRNA ligase, mitochondrial	65.5	57038	RARS2		x	Tot Ext MV
1184	P50749	Ras association domain-containing protein 2	37.8	9770	RASSF2	x	x	Tot Ext MV
1185	Q8WWW0	Ras association domain-containing protein 5	47.1	83593	RASSF5	x	x	Tot Ext MV
1186	Q8IY67-2	Isoform 2 of Ribonucleoprotein PTB-binding 1	77.8	125950	RAVER1		x	Tot Ext MV
1187	P06400	Retinoblastoma-associated protein	106.1	5925	RB1	x	x	Tot Ext MV
1188	Q9NW13-1	RNA-binding protein 28	85.7	55131	RBM28	x	x	Tot Ext MV
1189	P38159-1	RNA-binding motif protein, X chromosome	42.3	27316	RBMX	x	x	Tot Ext MV
1190	Q15293	Reticulocalbin-1	38.9	5954	RCN1	x	x	Tot Ext MV
1191	Q14257	Reticulocalbin-2	36.9	5955	RCN2	x	x	Tot Ext MV
1192	Q9Y3B8-1	Oligoribonuclease, mitochondrial	26.8	25996	REXO2		x	Tot Ext MV
1193	P35251-1	Replication factor C subunit 1	128.2	5981	RFC1	x	x	Tot Ext MV
1194	Q969G6	Riboflavin kinase	17.6	55312	RFK		x	Tot Ext MV
1195	Q96AA3	Protein RFT1 homolog	60.3	91869	RFT1		x	Tot Ext MV
1196	P48382	DNA-binding protein RFX5	65.3	5993	RFX5		x	Tot Ext MV
1197	O43665-3	Isoform 3 of Regulator of G-protein signaling 10	21.2	6001	RGS10	x	x	Tot Ext MV
1198	Q6R327-1	Rapamycin-insensitive companion of mTOR	192.1	253260	RICTOR	x	x	Tot Ext MV
1199	Q6NUQ1	RAD50-interacting protein 1	90.6	60561	RINT1		x	Tot Ext MV
1200	Q6F5E8	capping protein, Arp2/3 and myosin-I linker protein 2	154.6	146206	RLTPR; CARMIL2			Tot Ext MV
1201	Q05823	2-5A-dependent ribonuclease	83.5	6041	RNASEL		x	Tot Ext MV
1202	O00584	Ribonuclease T2	29.5	8635	RNASET2		x	Tot Ext MV
1203	Q9BV68-1	E3 ubiquitin-protein ligase RNF126	35.6	55658	RNF126		x	Tot Ext MV
1204	O75150	E3 ubiquitin-protein ligase BRE1B	113.6	9810	RNF40	x	x	Tot Ext MV
1205	O43148-1	mRNA cap guanine-N7 methyltransferase	54.8	8731	RNMT		x	Tot Ext MV
1206	Q96AT9	ribulose-phosphate 3-epimerase	24.9	6120	RPE		x	Tot Ext MV
1207	P62899	60S ribosomal protein L31	14.5	6160	RPL31	x	x	Tot Ext MV
1208	Q8N122	Regulatory-associated protein of mTOR	148.9	57521	RPTOR	x	x	Tot Ext MV
1209	Q14684	Ribosomal RNA processing protein 1 homolog B	84.4	23076	RRP1B	x	x	Tot Ext MV
1210	Q86VV8	Rotatin	248.5	25914	RTTN		x	Tot Ext MV
1211	Q13761-1	Runt-related transcription factor 3	44.3	864	RUNX3		x	Tot Ext MV
1212	Q9H446	rwd domain-containing protein 1	27.9	51389	RWDD1		x	Tot Ext MV
1213	Q96ER3	protein saal1	53.5	113174	SAAL1		x	Tot Ext MV
1214	Q9Y512	sorting and assembly machinery component 50 homolog	51.9	25813	SAMM50	x	x	Tot Ext MV
1215	Q9UHR5-1	SAP30-binding protein	33.9	29115	SAP30BP		x	Tot Ext MV
1216	Q9NP81-1	Serine--tRNA ligase, mitochondrial	58.2	54938	SARS2		x	Tot Ext MV
1217	Q14108-1	Lysosome membrane protein 2	54.3	950	SCARB2	x	x	Tot Ext MV
1218	Q12765	Secernin-1	46.4	9805	SCRN1	x	x	Tot Ext MV
1219	Q9NVU7	Protein SDA1 homolog	79.8	55153	SDAD1		x	Tot Ext MV
1220	P21912	Succinate dehydrogenase [ubiquinone] iron-sulfur subunit, mitochondrial	31.6	6390	SDHB		x	Tot Ext MV
1221	Q9BY50	Signal peptidase complex catalytic subunit SEC11C	21.5	90701	SEC11C		x	Tot Ext MV
1222	O94855	Protein transport protein Sec24D	112.9	9871	SEC24D	x	x	Tot Ext MV
1223	Q9H9S3	Protein transport protein Sec61 subunit alpha isoform 2	52.2	55176	SEC61A2		x	Tot Ext MV
1224	Q9UGP8	Translocation protein SEC63 homolog	87.9	11231	SEC63		x	Tot Ext MV
1225	Q9UBV2	Protein sel-1 homolog 1	88.7	6400	SEL1L	x	x	Tot Ext MV
1226	P62341	Thioredoxin reductase-like selenoprotein T	22.3	51714	SELT; SELENOT			Tot Ext MV
1227	P49903-1	Selenide, water dikinase 1	42.9	22929	SEPHS1		x	Tot Ext MV
1228	P50452	Serpin B8	42.7	5271	SERPINB8		x	Tot Ext MV
1229	Q86TU7	Histone-lysine N-methyltransferase setd3	67.2	84193	SETD3		x	Tot Ext MV
1230	Q15637	Splicing factor 1	68.3	7536	SF1	x	x	Tot Ext MV
1231	Q15428	splicing factor 3a subunit 2	49.2	8175	SF3A2	x	x	Tot Ext MV
1232	Q8N5H7-1	SH2 domain-containing protein 3C	94.4	10044	SH2D3C		x	Tot Ext MV
1233	Q9UQ13	Leucine-rich repeat protein SHOC-2	64.8	8036	SHOC2	x	x	Tot Ext MV
1234	Q96FS4	signal-induced proliferation-associated protein 1	112.1	6494	SIPA1		x	Tot Ext MV
1235	Q9NXA8-1	NAD-dependent protein deacylase sirtuin-5, mitochondrial	33.9	23408	SIRT5	x	x	Tot Ext MV
1236	Q86WV1-1	Src kinase-associated phosphoprotein 1	41.4	8631	SKAP1	x	x	Tot Ext MV
1237	Q9UP95	Solute carrier family 12 member 4	120.6	6560	SLC12A4	x	x	Tot Ext MV
1238	P53007	Tricarboxylate transport protein, mitochondrial	34	6576	SLC25A1	x	x	Tot Ext MV
1239	Q9UBX3	Mitochondrial dicarboxylate carrier	31.3	1468	SLC25A10	x	x	Tot Ext MV
1240	Q02978	Mitochondrial 2-oxoglutarate/malate carrier protein	34	8402	SLC25A11	x	x	Tot Ext MV
1241	O75746	Calcium-binding mitochondrial carrier protein Aralar1	74.7	8604	SLC25A12		x	Tot Ext MV
1242	Q9UJS0	Calcium-binding mitochondrial carrier protein Aralar2	74.1	10165	SLC25A13	x	x	Tot Ext MV
1243	Q9H936	Mitochondrial glutamate carrier 1	34.4	79751	SLC25A22		x	Tot Ext MV
1244	Q6NUK1	Calcium-binding mitochondrial carrier protein SCaMC-1	53.3	29957	SLC25A24		x	Tot Ext MV
1245	P12235	ADP/ATP translocase 1	33	291	SLC25A4	x	x	Tot Ext MV
1246	Q8TBP6	Solute carrier family 25 member 40	38.1	55972	SLC25A40		x	Tot Ext MV
1247	P50443	sulfate transporter	81.6	1836	SLC26A2	x	x	Tot Ext MV
1248	O14975	very long-chain acyl-CoA synthetase	70.3	11001	SLC27A2	x	x	Tot Ext MV
1249	Q5K4L6-1	Long-chain fatty acid transport protein 3	78.6	11000	SLC27A3		x	Tot Ext MV
1250	Q8NEW0	Zinc transporter 7	41.6	148867	SLC30A7	x	x	Tot Ext MV
1251	O00400	Acetyl-coenzyme A transporter 1	60.9	9197	SLC33A1	x	x	Tot Ext MV
1252	Q96GZ6	Solute carrier family 41 member 3	54.7	54946	SLC41A3		x	Tot Ext MV
1253	Q92536	Y+L amino acid transporter 2	56.8	9057	SLC7A6		x	Tot Ext MV
1254	Q92581-2	Isoform 2 of Sodium/hydrogen exchanger 6	77.9	10479	SLC9A6		x	Tot Ext MV
1255	Q08AF3-1	schlafen family member 5	101	162394	SLFN5	x	x	Tot Ext MV
1256	Q15796-1	Mothers against decapentaplegic homolog 2	52.3	4087	SMAD2	x	x	Tot Ext MV
1257	Q8IYB5	Stromal membrane-associated protein 1	50.4	60682	SMAP1		x	Tot Ext MV
1258	P51531	Probable global transcription activator SNF2L2	181.2	6595	SMARCA2		x	Tot Ext MV
1259	Q9NZC9	SWI/SNF-related matrix-associated actin-dependent regulator of chromatin subfamily A-like protein 1	105.9	50485	SMARCAL1		x	Tot Ext MV
1260	Q92922	SWI/SNF complex subunit SMARCC1	122.8	6599	SMARCC1	x	x	Tot Ext MV
1261	Q8TAQ2	SWI/SNF complex subunit SMARCC2	132.8	6601	SMARCC2	x	x	Tot Ext MV
1262	Q8IY18	structural maintenance of chromosomes protein 5	128.7	23137	SMC5	x	x	Tot Ext MV
1263	Q96Q15-1	Serine/threonine-protein kinase SMG1	410.2	23049	SMG1	x	x	Tot Ext MV
1264	Q9NXE4-2	Isoform 2 of Sphingomyelin phosphodiesterase 4	90.1	55627	SMPD4	x	x	Tot Ext MV
1265	O95295	SNARE-associated protein Snapin	14.9	23557	SNAPIN		x	Tot Ext MV
1266	Q8WVK2	U4/U6.U5 small nuclear ribonucleoprotein 27 kDa protein	18.8	11017	SNRNP27		x	Tot Ext MV
1267	Q13884	Beta-1-syntrophin	58	6641	SNTB1	x	x	Tot Ext MV
1268	Q96RF0-2	Isoform 2 of Sorting nexin-18	69	112574	SNX18	x	x	Tot Ext MV
1269	Q96L92	Sorting nexin-27	61.2	81609	SNX27	x	x	Tot Ext MV
1270	P35610	sterol O-acyltransferase 1	64.7	6646	SOAT1		x	Tot Ext MV
1271	O60271-4	Isoform 4 of C-Jun-amino-terminal kinase-interacting protein 4	144.6	9043	SPAG9	x	x	Tot Ext MV
1272	Q9HBM1	Kinetochore protein Spc25	26.1	57405	SPC25		x	Tot Ext MV
1273	Q9H2V7	Protein spinster homolog 1	56.6	83985	SPNS1	x	x	Tot Ext MV
1274	Q8WW59	SPRY domain-containing protein 4	23.1	283377	SPRYD4		x	Tot Ext MV
1275	P09132-1	Signal recognition particle 19 kDa protein	16.1	6728	SRP19		x	Tot Ext MV
1276	Q13242	serine/arginine-rich splicing factor 9	25.5	8683	SRSF9	x	x	Tot Ext MV
1277	Q9UNL2	Translocon-associated protein subunit gamma	21.1	6747	SSR3	x	x	Tot Ext MV
1278	Q9NP77	RNA polymerase II subunit A C-terminal domain phosphatase SSU72	22.6	29101	SSU72		x	Tot Ext MV
1279	Q13586	stromal interaction molecule 1	77.4	6786	STIM1	x	x	Tot Ext MV
1280	Q13188	serine/threonine-protein kinase 3	56.3	6788	STK3		x	Tot Ext MV
1281	Q9UEW8	STE20/SPS1-related proline-alanine-rich protein kinase	59.4	27347	STK39	x	x	Tot Ext MV
1282	P08842	Steryl-sulfatase	65.5	412	STS			Tot Ext MV
1283	Q8TCJ2	Dolichyl-diphosphooligosaccharide--protein glycosyltransferase subunit STT3B	93.6	201595	STT3B	x	x	Tot Ext MV
1284	Q5T5C0-1	Syntaxin-binding protein 5	127.5	134957	STXBP5	x	x	Tot Ext MV
1285	Q9P2R7	Succinate--CoA ligase [ADP-forming] subunit beta, mitochondrial	50.3	8803	SUCLA2	x	x	Tot Ext MV
1286	Q96I99-1	Succinate--CoA ligase [GDP-forming] subunit beta, mitochondrial	46.5	8801	SUCLG2	x	x	Tot Ext MV
1287	Q8NBJ7-1	Sulfatase-modifying factor 2	33.8	25870	SUMF2		x	Tot Ext MV
1288	Q9UH99	SUN domain-containing protein 2	80.3	25777	SUN2		x	Tot Ext MV
1289	Q8IYB8	ATP-dependent RNA helicase SUPV3L1, mitochondrial	87.9	6832	SUPV3L1		x	Tot Ext MV
1290	Q92797-1	Symplekin	141.1	8189	SYMPK	x	x	Tot Ext MV
1291	Q8WXH0-1	Nesprin-2	795.9	23224	SYNE2	x	x	Tot Ext MV
1292	Q6ZMZ3	Nesprin-3	112.1	161176	SYNE3		x	Tot Ext MV
1293	Q86TM6	E3 ubiquitin-protein ligase synoviolin	67.6	84447	SYVN1		x	Tot Ext MV
1294	Q15750-1	TGF-beta-activated kinase 1 and MAP3K7-binding protein 1	54.6	10454	TAB1		x	Tot Ext MV
1295	Q9Y6A5	Transforming acidic coiled-coil-containing protein 3	90.3	10460	TACC3		x	Tot Ext MV
1296	Q9BSH4	Translational activator of cytochrome c oxidase 1	32.5	51204	TACO1		x	Tot Ext MV
1297	Q03518	Antigen peptide transporter 1	87.2	6890	TAP1	x	x	Tot Ext MV
1298	Q9BW92	Threonine--tRNA ligase, mitochondrial	81	80222	TARS2		x	Tot Ext MV
1299	Q8TC07-3	Isoform 3 of TBC1 domain family member 15	78.5	64786	TBC1D15	x	x	Tot Ext MV
1300	Q66K14-1	TBC1 domain family member 9B	140.4	23061	TBC1D9B		x	Tot Ext MV
1301	Q9BZK7	F-box-like/WD repeat-containing protein TBL1XR1	55.6	79718	TBL1XR1	x	x	Tot Ext MV
1302	Q12788	Transducin beta-like protein 3	89	10607	TBL3		x	Tot Ext MV
1303	Q969Z0-1	Protein TBRG4	70.7	9238	TBRG4		x	Tot Ext MV
1304	P24557	Thromboxane-A synthase	60.5	6916	TBXAS1	x	x	Tot Ext MV
1305	P23193	Transcription elongation factor A protein 1	33.9	6917	TCEA1	x	x	Tot Ext MV
1306	O14776-1	Transcription elongation regulator 1	123.8	10915	TCERG1		x	Tot Ext MV
1307	Q13488	V-type proton ATPase 116 kDa subunit a isoform 3	92.9	10312	TCIRG1	x	x	Tot Ext MV
1308	Q9NUW8	tyrosyl-DNA phosphodiesterase 1	68.4	55775	TDP1		x	Tot Ext MV
1309	Q9NZ01-1	Very-long-chain enoyl-CoA reductase	36	9524	TECR		x	Tot Ext MV
1310	Q00059	Transcription factor A, mitochondrial	29.1	7019	TFAM		x	Tot Ext MV
1311	Q9UBB9-1	Tuftelin-interacting protein 11	96.8	24144	TFIP11		x	Tot Ext MV
1312	Q5TEJ8	protein THEMIS2	72	9473	THEMIS2	x		Tot Ext MV
1313	Q9NWX6	probable tRNA(His) guanylyltransferase	34.8	54974	THG1L		x	Tot Ext MV
1314	Q9P016	Thymocyte nuclear protein 1	25.7	29087	THYN1	x	x	Tot Ext MV
1315	P31483	nucleolysin TIA-1 isoform p40	42.9	7072	TIA1		x	Tot Ext MV
1316	Q9UNS1	Protein timeless homolog	138.6	8914	TIMELESS		x	Tot Ext MV
1317	O60830-1	Mitochondrial import inner membrane translocase subunit Tim17-B	18.3	10245	TIMM17B		x	Tot Ext MV
1318	O14925	Mitochondrial import inner membrane translocase subunit tim23	21.9	100287932	TIMM23		x	Tot Ext MV
1319	O43615	Mitochondrial import inner membrane translocase subunit TIM44	51.3	10469	TIMM44	x	x	Tot Ext MV
1320	Q86WV6	Stimulator of interferon genes protein	42.2	340061	TMEM173		x	Tot Ext MV
1321	Q13404-1	Isoform 1 of Ubiquitin-conjugating enzyme E2 variant 1	25.8	387522; 7335	TMEM189-UBE2V1; UBE2V1			Tot Ext MV
1322	Q6NUQ4	Transmembrane protein 214	77.1	54867	TMEM214		x	Tot Ext MV
1323	Q9H330	Transmembrane protein 245	100.9	23731	TMEM245	x	x	Tot Ext MV
1324	Q9BUB7	Transmembrane protein 70, mitochondrial	29	54968	TMEM70		x	Tot Ext MV
1325	P42166	Lamina-associated polypeptide 2, isoform alpha	75.4	7112	TMPO	x	x	Tot Ext MV
1326	P42167	Lamina-associated polypeptide 2, isoforms beta/gamma	50.6	7112	TMPO	x	x	Tot Ext MV
1327	Q6ZT21-1	Transmembrane protein with metallophosphoesterase domain	49.4	643853	TMPPE		x	Tot Ext MV
1328	Q9H1E5	Thioredoxin-related transmembrane protein 4	38.9	56255	TMX4		x	Tot Ext MV
1329	O14787-2	Isoform 2 of Transportin-2	100.3	30000	TNPO2	x	x	Tot Ext MV
1330	Q96GM8	Target of EGR1 protein 1	56.5	114034	TOE1	x	x	Tot Ext MV
1331	O60784	Target of Myb protein 1	53.8	10043	TOM1	x	x	Tot Ext MV
1332	Q9NS69	Mitochondrial import receptor subunit TOM22 homolog	15.5	56993	TOMM22	x	x	Tot Ext MV
1333	Q8NFQ8	Torsin-1A-interacting protein 2	51.2	163590	TOR1AIP2	x	x	Tot Ext MV
1334	O14657	Torsin-1B	38	27348	TOR1B	x	x	Tot Ext MV
1335	Q5JU69-1	Torsin-2A	35.7	27433	TOR2A		x	Tot Ext MV
1336	Q53FA7-1	Quinone oxidoreductase PIG3	35.5	9540	TP53I3		x	Tot Ext MV
1337	P12270	Nucleoprotein TPR	267.1	7175	TPR	x	x	Tot Ext MV
1338	Q15629	Translocating chain-associated membrane protein 1	43	23471	TRAM1		x	Tot Ext MV
1339	P48553	Trafficking protein particle complex subunit 10	142.1	7109	TRAPPC10	x	x	Tot Ext MV
1340	Q9Y296	Trafficking protein particle complex subunit 4	24.3	51399	TRAPPC4	x	x	Tot Ext MV
1341	Q12899	Tripartite motif-containing protein 26	62.1	7726	TRIM26	x	x	Tot Ext MV
1342	O00635	E3 ubiquitin-protein ligase TRIM38	53.4	10475	TRIM38	x	x	Tot Ext MV
1343	Q15643	Thyroid receptor-interacting protein 11	227.4	9321	TRIP11	x	x	Tot Ext MV
1344	Q14669-1	E3 ubiquitin-protein ligase TRIP12	220.3	9320	TRIP12	x	x	Tot Ext MV
1345	Q7L0Y3	Mitochondrial ribonuclease P protein 1	47.3	54931	TRMT10C			Tot Ext MV
1346	Q96Q11-1	CCA tRNA nucleotidyltransferase 1, mitochondrial	50.1	51095	TRNT1		x	Tot Ext MV
1347	Q9UL62	Short transient receptor potential channel 5	111.3	7224	TRPC5		x	Tot Ext MV
1348	Q9Y3Q8	TSC22 domain family protein 4	41	81628	TSC22D4		x	Tot Ext MV
1349	P43897	Elongation factor Ts, mitochondrial	35.4	10102	TSFM	x	x	Tot Ext MV
1350	P30536	translocator protein	18.8	706	TSPO	x	x	Tot Ext MV
1351	Q2NL82	Pre-rRNA-processing protein TSR1 homolog	91.8	55720	TSR1	x	x	Tot Ext MV
1352	O43156	TELO2-interacting protein 1 homolog	122	9675	TTI1	x	x	Tot Ext MV
1353	O95881	Thioredoxin domain-containing protein 12	19.2	51060	TXNDC12		x	Tot Ext MV
1354	Q9NNW7-1	thioredoxin reductase 2, mitochondrial	56.5	10587	TXNRD2		x	Tot Ext MV
1355	P41226	ubiquitin-like modifier-activating enzyme 7	111.6	7318	UBA7	x	x	Tot Ext MV
1356	Q16763	ubiquitin-conjugating enzyme E2 S	23.8	27338	UBE2S		x	Tot Ext MV
1357	Q15386-1	Ubiquitin-protein ligase E3C	123.8	9690	UBE3C	x	x	Tot Ext MV
1358	Q8IWV8	E3 ubiquitin-protein ligase UBR2	200.4	23304	UBR2	x	x	Tot Ext MV
1359	O94874-1	E3 UFM1-protein ligase 1	89.5	23376	UFL1	x	x	Tot Ext MV
1360	Q96T88	E3 ubiquitin-protein ligase UHRF1	89.8	29128	UHRF1	x	x	Tot Ext MV
1361	Q13432	protein unc-119 homolog A	26.9	9094	UNC119		x	Tot Ext MV
1362	Q9H1C4	Protein unc-93 homolog B1	66.6	81622	UNC93B1		x	Tot Ext MV
1363	Q9HAU5	Regulator of nonsense transcripts 2	147.7	26019	UPF2		x	Tot Ext MV
1364	Q9NVA1	Ubiquinol-cytochrome-c reductase complex assembly factor 1	34.6	55245	UQCC; UQCC1			Tot Ext MV
1365	Q13107-1	Ubiquitin carboxyl-terminal hydrolase 4	108.5	7375	USP4	x	x	Tot Ext MV
1366	Q96K76	ubiquitin carboxyl-terminal hydrolase 47	157.2	55031	USP47		x	Tot Ext MV
1367	O75691	Small subunit processome component 20 homolog	318.2	27340	UTP20	x	x	Tot Ext MV
1368	Q9UBK9	protein UXT	18.2	8409	UXT		x	Tot Ext MV
1369	Q08AM6	Protein VAC14 homolog	87.9	55697	VAC14	x	x	Tot Ext MV
1370	Q5ST30-1	Valine--tRNA ligase, mitochondrial	118.4	57176	VARS2		x	Tot Ext MV
1371	Q96JH7	Deubiquitinating protein VCIP135	134.2	80124	VCPIP1	x	x	Tot Ext MV
1372	Q96GC9	Vacuole membrane protein 1	46.2	81671	VMP1	x	x	Tot Ext MV
1373	Q9H270	Vacuolar protein sorting-associated protein 11 homolog	107.8	55823	VPS11	x	x	Tot Ext MV
1374	Q96RL7	Vacuolar protein sorting-associated protein 13a	360	23230	VPS13A		x	Tot Ext MV
1375	Q9H267	Vacuolar protein sorting-associated protein 33B	70.5	26276	VPS33B	x	x	Tot Ext MV
1376	Q96JC1-1	Vam6/Vps39-like protein	101.7	23339	VPS39	x	x	Tot Ext MV
1377	Q9NRW7	Vacuolar protein sorting-associated protein 45	65	11311	VPS45	x	x	Tot Ext MV
1378	A3KMH1	von Willebrand factor A domain-containing protein 8	214.7	23078	VWA8			Tot Ext MV
1379	Q9UGM6-1	Tryptophan--tRNA ligase, mitochondrial	40.1	10352	WARS2			Tot Ext MV
1380	Q9Y2W2	WW domain-binding protein 11	70	51729	WBP11		x	Tot Ext MV
1381	Q8IWB7	WD repeat and FYVE domain-containing protein 1	46.3	57590	WDFY1	x	x	Tot Ext MV
1382	Q9GZL7	ribosome biogenesis protein WDR12	47.7	55759	WDR12	x	x	Tot Ext MV
1383	Q9NNW5	WD repeat-containing protein 6	121.6	11180	WDR6		x	Tot Ext MV
1384	Q01831	DNA repair protein complementing XP-C cells	105.9	7508	XPC		x	Tot Ext MV
1385	P18887	DNA repair protein XRCC1	69.4	7515	XRCC1		x	Tot Ext MV
1386	Q13426-1	DNA repair protein xrcc4	38.3	7518	XRCC4			Tot Ext MV
1387	Q8IZH2-1	5'-3' exoribonuclease 1	194	54464	XRN1	x	x	Tot Ext MV
1388	Q9Y2Z4	Tyrosine--tRNA ligase, mitochondrial	53.2	51067	YARS2		x	Tot Ext MV
1389	Q86U90	YrdC domain-containing protein, mitochondrial	29.3	79693	YRDC		x	Tot Ext MV
1390	Q9Y5A9-1	YTH domain-containing family protein 2	62.3	51441	YTHDF2		x	Tot Ext MV
1391	Q8N4Q0	Prostaglandin reductase 3	40.1	284273	ZADH2		x	Tot Ext MV
1392	Q9NYL2	mitogen-activated protein kinase kinase kinase 20	91.1	51776	ZAK; MAP3K20			Tot Ext MV
1393	Q96KR1	Zinc finger RNA-binding protein	116.9	51663	ZFR		x	Tot Ext MV
1394	Q969S3	Zinc finger protein 622	54.2	90441	ZNF622		x	Tot Ext MV
1395	Q9P2E3-1	NFX1-type zinc finger-containing protein 1	220.1	57169	ZNFX1		x	Tot Ext MV
1396	O43264	Centromere/kinetochore protein zw10 homolog	88.8	9183	ZW10	x	x	Tot Ext MV
1397	P0DOX7	immunoglobulin kappa light chain	23.4					Tot Ext MV Exo
1398	P01023	alpha-2-macroglobulin	163.2	2	A2M	x	x	Tot Ext MV Exo
1399	Q6PD74	Alpha- and gamma-adaptin-binding protein p34	34.6	79719	AAGAB		x	Tot Ext MV Exo
1400	Q2M2I8-1	AP2-associated protein kinase 1	103.8	22848	AAK1		x	Tot Ext MV Exo
1401	P49588	Alanine--tRNA ligase, cytoplasmic	106.7	16	AARS	x	x	Tot Ext MV Exo
1402	Q9NRN7	L-aminoadipate-semialdehyde dehydrogenase-phosphopantetheinyl transferase	35.8	60496	AASDHPPT	x	x	Tot Ext MV Exo
1403	P08183	multidrug resistance protein 1	141.4	5243	ABCB1	x	x	Tot Ext MV Exo
1404	P33527	Multidrug resistance-associated protein 1	171.5	4363	ABCC1	x	x	Tot Ext MV Exo
1405	P61221	ATP-binding cassette sub-family E member 1	67.3	6059	ABCE1	x	x	Tot Ext MV Exo
1406	Q8NE71-1	ATP-binding cassette sub-family F member 1	95.9	23	ABCF1	x	x	Tot Ext MV Exo
1407	Q9UG63	ATP-binding cassette sub-family F member 2	71.2	10061	ABCF2	x	x	Tot Ext MV Exo
1408	Q96IU4	Protein ABHD14B	22.3	84836	ABHD14B	x	x	Tot Ext MV Exo
1409	Q5VST6-1	Protein ABHD17B	32.2	51104	ABHD17B; FAM108B1			Tot Ext MV Exo
1410	Q8IZP0	abl interactor 1	55	10006	ABI1	x	x	Tot Ext MV Exo
1411	Q9P2A4	ABI gene family member 3	39	51225	ABI3	x	x	Tot Ext MV Exo
1412	P42765	3-ketoacyl-CoA thiolase, mitochondrial	41.9	10449	ACAA2	x	x	Tot Ext MV Exo
1413	Q13085-1	Acetyl-CoA carboxylase 1	265.4	31	ACACA	x	x	Tot Ext MV Exo
1414	Q15027	Arf-GAP with coiled-coil, ANK repeat and PH domain-containing protein 1	81.5	9744	ACAP1	x	x	Tot Ext MV Exo
1415	Q15057	Arf-GAP with coiled-coil, ANK repeat and PH domain-containing protein 2	88	23527	ACAP2		x	Tot Ext MV Exo
1416	P24752	Acetyl-CoA acetyltransferase, mitochondrial	45.2	38	ACAT1	x	x	Tot Ext MV Exo
1417	Q9BWD1	Acetyl-CoA acetyltransferase, cytosolic	41.3	39	ACAT2	x	x	Tot Ext MV Exo
1418	Q9H3P7	Golgi resident protein GCP60	60.6	64746	ACBD3	x	x	Tot Ext MV Exo
1419	P53396-1	ATP-citrate synthase	120.8	47	ACLY	x	x	Tot Ext MV Exo
1420	P21399	Cytoplasmic aconitate hydratase	98.3	48	ACO1	x	x	Tot Ext MV Exo
1421	Q99798	Aconitate hydratase, mitochondrial	85.4	50	ACO2	x	x	Tot Ext MV Exo
1422	O00154	cytosolic acyl coenzyme A thioester hydrolase	41.8	11332	ACOT7	x	x	Tot Ext MV Exo
1423	P24666-1	Low molecular weight phosphotyrosine protein phosphatase	18	52	ACP1	x	x	Tot Ext MV Exo
1424	O60488-1	Long-chain-fatty-acid--CoA ligase 4	79.1	2182	ACSL4	x	x	Tot Ext MV Exo
1425	P60709	Actin, cytoplasmic 1	41.7	60	ACTB	x	x	Tot Ext MV Exo
1426	Q562R1	Beta-actin-like protein 2	42	345651	ACTBL2	x	x	Tot Ext MV Exo
1427	P68032	Actin, alpha cardiac muscle 1	42	70	ACTC1	x	x	Tot Ext MV Exo
1428	O96019-1	Actin-like protein 6A	47.4	86	ACTL6A	x	x	Tot Ext MV Exo
1429	P12814-1	Alpha-actinin-1	103	87	ACTN1	x	x	Tot Ext MV Exo
1430	O43707	Alpha-actinin-4	104.8	81	ACTN4	x	x	Tot Ext MV Exo
1431	Q9NZ32	Actin-related protein 10	46.3	55860	ACTR10	x	x	Tot Ext MV Exo
1432	P61163	Alpha-centractin	42.6	10121	ACTR1A	x	x	Tot Ext MV Exo
1433	P42025	Beta-centractin	42.3	10120	ACTR1B	x	x	Tot Ext MV Exo
1434	P61160-1	Actin-related protein 2	44.7	10097	ACTR2	x	x	Tot Ext MV Exo
1435	P61158	actin-related protein 3	47.3	10096	ACTR3	x	x	Tot Ext MV Exo
1436	P00813	adenosine deaminase	40.7	100	ADA	x	x	Tot Ext MV Exo
1437	O14672	Disintegrin and metalloproteinase domain-containing protein 10	84.1	102	ADAM10	x	x	Tot Ext MV Exo
1438	P78536-1	Disintegrin and metalloproteinase domain-containing protein 17	93	6868	ADAM17	x	x	Tot Ext MV Exo
1439	P51828	adenylate cyclase type 7	120.2	113	ADCY7		x	Tot Ext MV Exo
1440	P35611-1	Alpha-adducin	80.9	118	ADD1	x	x	Tot Ext MV Exo
1441	Q9UEY8-1	Gamma-adducin	79.1	120	ADD3		x	Tot Ext MV Exo
1442	P11766	alcohol dehydrogenase class-3	39.7	128	ADH5	x	x	Tot Ext MV Exo
1443	P55263-1	Adenosine kinase	40.5	132	ADK	x	x	Tot Ext MV Exo
1444	Q9BRR6-1	ADP-dependent glucokinase	54.1	83440	ADPGK		x	Tot Ext MV Exo
1445	P54922	[Protein ADP-ribosylarginine] hydrolase	39.5	141	ADPRH		x	Tot Ext MV Exo
1446	Q9NX46	Poly(ADP-ribose) glycohydrolase ARH3	38.9	54936	ADPRHL2	x	x	Tot Ext MV Exo
1447	P25098	Beta-adrenergic receptor kinase 1	79.5	156	ADRBK1; GRK2			Tot Ext MV Exo
1448	Q16186	Proteasomal ubiquitin receptor ADRM1	42.1	11047	ADRM1	x	x	Tot Ext MV Exo
1449	P30566	adenylosuccinate lyase	54.9	158	ADSL	x	x	Tot Ext MV Exo
1450	P30520	adenylosuccinate synthetase isozyme 2	50.1	159	ADSS	x	x	Tot Ext MV Exo
1451	Q99490-2	Isoform 2 of Arf-GAP with GTPase, ANK repeat and PH domain-containing protein 2	90.5	116986	AGAP2		x	Tot Ext MV Exo
1452	P35573-1	glycogen debranching enzyme	174.7	178	AGL	x	x	Tot Ext MV Exo
1453	Q9UKV8	Protein argonaute-2	97.1	27161	AGO2; EIF2C2			Tot Ext MV Exo
1454	O00468-3	Isoform 3 of Agrin	215.2	375790	AGRN	x	x	Tot Ext MV Exo
1455	Q6RW13	Type-1 angiotensin II receptor-associated protein	17.4	57085	AGTRAP	x	x	Tot Ext MV Exo
1456	P23526-1	Adenosylhomocysteinase	47.7	191	AHCY	x	x	Tot Ext MV Exo
1457	O43865	S-adenosylhomocysteine hydrolase-like protein 1	58.9	10768	AHCYL1	x	x	Tot Ext MV Exo
1458	Q09666-1	Neuroblast differentiation-associated protein AHNAK	628.7	79026	AHNAK	x	x	Tot Ext MV Exo
1459	O95433	activator of 90 kDa heat shock protein ATPase homolog 1	38.3	10598	AHSA1	x	x	Tot Ext MV Exo
1460	Q96BJ3-1	Axin interactor, dorsalization-associated protein	35	64853	AIDA	x	x	Tot Ext MV Exo
1461	Q9Y4K1	beta/gamma crystallin domain-containing protein 1	188.6	202	AIM1; CRYBG1			Tot Ext MV Exo
1462	Q12904-1	aminoacyl tRNA synthase complex-interacting multifunctional protein 1	34.3	9255	AIMP1	x	x	Tot Ext MV Exo
1463	Q13155	aminoacyl tRNA synthase complex-interacting multifunctional protein 2	35.3	7965	AIMP2	x	x	Tot Ext MV Exo
1464	O00170	AH receptor-interacting protein	37.6	9049	AIP		x	Tot Ext MV Exo
1465	P54819	Adenylate kinase 2, mitochondrial	26.5	204	AK2	x	x	Tot Ext MV Exo
1466	P14550	alcohol dehydrogenase [NADP(+)]	36.6	10327	AKR1A1	x	x	Tot Ext MV Exo
1467	P15121	aldose reductase	35.8	231	AKR1B1	x	x	Tot Ext MV Exo
1468	P42330	Aldo-keto reductase family 1 member C3	36.8	8644	AKR1C3	x	x	Tot Ext MV Exo
1469	O43488	aflatoxin B1 aldehyde reductase member 2	39.6	8574	AKR7A2	x	x	Tot Ext MV Exo
1470	P31749	RAC-alpha serine/threonine-protein kinase	55.7	207	AKT1	x	x	Tot Ext MV Exo
1471	P02768-1	Serum albumin	69.3	213	ALB	x	x	Tot Ext MV Exo
1472	Q13740-1	CD166 antigen	65.1	214	ALCAM	x	x	Tot Ext MV Exo
1473	Q8IZ83	Aldehyde dehydrogenase family 16 member A1	85.1	126133	ALDH16A1	x	x	Tot Ext MV Exo
1474	P54886	delta-1-pyrroline-5-carboxylate synthase	87.2	5832	ALDH18A1	x	x	Tot Ext MV Exo
1475	P49189	4-trimethylaminobutyraldehyde dehydrogenase	53.8	223	ALDH9A1	x	x	Tot Ext MV Exo
1476	P04075	fructose-bisphosphate aldolase A	39.4	226	ALDOA	x	x	Tot Ext MV Exo
1477	P09972	Fructose-bisphosphate aldolase C	39.4	230	ALDOC	x	x	Tot Ext MV Exo
1478	Q01433-1	AMP deaminase 2	100.6	271	AMPD2	x	x	Tot Ext MV Exo
1479	P04745	alpha-amylase 1	57.7	276; 278; 277	AMY1A; AMY1C; AMY1B			Tot Ext MV Exo
1480	Q9H1A4	anaphase-promoting complex subunit 1	216.4	64682	ANAPC1	x	x	Tot Ext MV Exo
1481	Q9UJX5	Anaphase-promoting complex subunit 4	92.1	29945	ANAPC4		x	Tot Ext MV Exo
1482	Q9UJX4	Anaphase-promoting complex subunit 5	85	51433	ANAPC5	x	x	Tot Ext MV Exo
1483	Q9P2R3	Rabankyrin-5	128.3	51479	ANKFY1	x	x	Tot Ext MV Exo
1484	O15084-1	Isoform 3 of Serine/threonine-protein phosphatase 6 regulatory ankyrin repeat subunit A	116.5	23243	ANKRD28	x	x	Tot Ext MV Exo
1485	Q8N8A2	Serine/threonine-protein phosphatase 6 regulatory ankyrin repeat subunit B	107.5	91526	ANKRD44	x	x	Tot Ext MV Exo
1486	Q4KMQ2-1	Anoctamin-6	106.1	196527	ANO6	x	x	Tot Ext MV Exo
1487	P39687	Acidic leucine-rich nuclear phosphoprotein 32 family member A	28.6	8125	ANP32A	x	x	Tot Ext MV Exo
1488	Q92688	Acidic leucine-rich nuclear phosphoprotein 32 family member B	28.8	10541	ANP32B	x	x	Tot Ext MV Exo
1489	Q9BTT0	Acidic leucine-rich nuclear phosphoprotein 32 family member E	30.7	81611	ANP32E	x	x	Tot Ext MV Exo
1490	P04083	annexin A1	38.7	301	ANXA1	x	x	Tot Ext MV Exo
1491	P50995	annexin A11	54.4	311	ANXA11	x	x	Tot Ext MV Exo
1492	P07355	Annexin A2	38.6	302	ANXA2	x	x	Tot Ext MV Exo
1493	P12429	annexin A3	36.4	306	ANXA3	x	x	Tot Ext MV Exo
1494	P09525	annexin A4	35.9	307	ANXA4	x	x	Tot Ext MV Exo
1495	P08758	annexin A5	35.9	308	ANXA5	x	x	Tot Ext MV Exo
1496	P08133-1	annexin A6	75.8	309	ANXA6	x	x	Tot Ext MV Exo
1497	P20073-1	Annexin A7	52.7	310	ANXA7	x	x	Tot Ext MV Exo
1498	P28039-1	Acyloxyacyl hydrolase	65.1	313	AOAH			Tot Ext MV Exo
1499	Q10567	AP-1 complex subunit beta-1	104.6	162	AP1B1	x	x	Tot Ext MV Exo
1500	O43747-1	AP-1 complex subunit gamma-1	91.3	164	AP1G1	x	x	Tot Ext MV Exo
1501	O75843	AP-1 complex subunit gamma-like 2	87.1	8906	AP1G2	x	x	Tot Ext MV Exo
1502	Q9BXS5-1	AP-1 complex subunit mu-1	48.6	8907	AP1M1	x	x	Tot Ext MV Exo
1503	P61966	AP-1 complex subunit sigma-1A	18.7	1174	AP1S1	x	x	Tot Ext MV Exo
1504	P56377	AP-1 complex subunit sigma-2	18.6	8905	AP1S2		x	Tot Ext MV Exo
1505	O95782	AP-2 complex subunit alpha-1	107.5	160	AP2A1	x	x	Tot Ext MV Exo
1506	O94973	AP-2 complex subunit alpha-2	103.9	161	AP2A2	x	x	Tot Ext MV Exo
1507	P63010-1	AP-2 complex subunit beta	104.5	163	AP2B1	x	x	Tot Ext MV Exo
1508	Q96CW1	AP-2 complex subunit mu	49.6	1173	AP2M1	x	x	Tot Ext MV Exo
1509	P53680	AP-2 complex subunit sigma	17	1175	AP2S1	x	x	Tot Ext MV Exo
1510	O00203-1	AP-3 complex subunit beta-1	121.2	8546	AP3B1	x	x	Tot Ext MV Exo
1511	O14617-1	AP-3 complex subunit delta-1	130.1	8943	AP3D1	x	x	Tot Ext MV Exo
1512	Q9Y2T2	ap-3 complex subunit mu-1	46.9	26985	AP3M1	x	x	Tot Ext MV Exo
1513	Q92572	AP-3 complex subunit sigma-1	21.7	1176	AP3S1		x	Tot Ext MV Exo
1514	O14727	apoptotic protease-activating factor 1	141.7	317	APAF1	x	x	Tot Ext MV Exo
1515	Q7Z5R6	Amyloid beta A4 precursor protein-binding family B member 1-interacting protein	73.1	54518	APBB1IP	x	x	Tot Ext MV Exo
1516	P13798	Acylamino-acid-releasing enzyme	81.2	327	APEH	x	x	Tot Ext MV Exo
1517	P27695	DNA-(apurinic or apyrimidinic site) lyase	35.5	328	APEX1	x	x	Tot Ext MV Exo
1518	Q9BZZ5-2	Isoform 2 of Apoptosis inhibitor 5	56.7	8539	API5	x	x	Tot Ext MV Exo
1519	Q9HDC9	Adipocyte plasma membrane-associated protein	46.5	57136	APMAP	x		Tot Ext MV Exo
1520	P02647	Apolipoprotein A-I	30.8	335	APOA1	x	x	Tot Ext MV Exo
1521	Q8NCW5	NAD(P)H-hydrate epimerase	31.7	128240	APOA1BP; NAXE			Tot Ext MV Exo
1522	P04114	apolipoprotein B-100	515.3	338	APOB	x	x	Tot Ext MV Exo
1523	Q9NRW3	DNA dC->dU-editing enzyme APOBEC-3C	22.8	27350	APOBEC3C	x	x	Tot Ext MV Exo
1524	Q9HC16	DNA dC->dU-editing enzyme APOBEC-3G	46.4	60489	APOBEC3G		x	Tot Ext MV Exo
1525	P02649	Apolipoprotein E	36.1	348	APOE	x	x	Tot Ext MV Exo
1526	Q9BQE5	apolipoprotein L2	37.1	23780	APOL2	x	x	Tot Ext MV Exo
1527	O95236-1	Apolipoprotein L3	44.3	80833	APOL3		x	Tot Ext MV Exo
1528	P07741-1	Adenine phosphoribosyltransferase	19.6	353	APRT	x	x	Tot Ext MV Exo
1529	O60306	Intron-binding protein aquarius	171.2	9716	AQR	x	x	Tot Ext MV Exo
1530	Q96P48-6	Arf-GAP with Rho-GAP domain, ANK repeat and PH domain-containing protein 1	162.1	116985	ARAP1	x	x	Tot Ext MV Exo
1531	P48444	Coatomer subunit delta	57.2	372	ARCN1	x	x	Tot Ext MV Exo
1532	P84077	ADP-ribosylation factor 1	20.7	375	ARF1	x	x	Tot Ext MV Exo
1533	P61204	ADP-ribosylation factor 3	20.6	377	ARF3	x	x	Tot Ext MV Exo
1534	P18085	ADP-ribosylation factor 4	20.5	378	ARF4	x	x	Tot Ext MV Exo
1535	P84085	ADP-ribosylation factor 5	20.5	381	ARF5	x	x	Tot Ext MV Exo
1536	P62330	ADP-ribosylation factor 6	20.1	382	ARF6	x	x	Tot Ext MV Exo
1537	Q9Y6D5	Brefeldin A-inhibited guanine nucleotide-exchange protein 2	201.9	10564	ARFGEF2	x	x	Tot Ext MV Exo
1538	P05089	Arginase-1	34.7	383	ARG1	x	x	Tot Ext MV Exo
1539	Q07960	rho GTPase-activating protein 1	50.4	392	ARHGAP1	x	x	Tot Ext MV Exo
1540	Q53QZ3	Rho GTPase-activating protein 15	54.5	55843	ARHGAP15	x	x	Tot Ext MV Exo
1541	Q68EM7	Rho GTPase-activating protein 17	95.4	55114	ARHGAP17	x	x	Tot Ext MV Exo
1542	Q8N392-1	Rho GTPase-activating protein 18	74.9	93663	ARHGAP18	x	x	Tot Ext MV Exo
1543	P42331-4	Isoform 4 of Rho GTPase-activating protein 25	73.5	9938	ARHGAP25		x	Tot Ext MV Exo
1544	Q7Z6I6-1	Rho GTPase-activating protein 30	118.5	257106	ARHGAP30		x	Tot Ext MV Exo
1545	P98171-1	Rho GTPase-activating protein 4	105	393	ARHGAP4	x	x	Tot Ext MV Exo
1546	P52565-1	rho GDP-dissociation inhibitor 1	23.2	396	ARHGDIA	x	x	Tot Ext MV Exo
1547	P52566	Rho GDP-dissociation inhibitor 2	23	397	ARHGDIB	x	x	Tot Ext MV Exo
1548	Q92888-1	Rho guanine nucleotide exchange factor 1	102.4	9138	ARHGEF1	x	x	Tot Ext MV Exo
1549	Q92974	Rho guanine nucleotide exchange factor 2	111.5	9181	ARHGEF2	x	x	Tot Ext MV Exo
1550	Q15052	Rho guanine nucleotide exchange factor 6	87.4	9459	ARHGEF6	x	x	Tot Ext MV Exo
1551	Q14155-1	Isoform 1 of Rho guanine nucleotide exchange factor 7	73.1	8874	ARHGEF7	x	x	Tot Ext MV Exo
1552	Q9Y4X5	E3 ubiquitin-protein ligase ARIH1	64.1	25820	ARIH1		x	Tot Ext MV Exo
1553	O95376	E3 ubiquitin-protein ligase ARIH2	57.8	10425	ARIH2		x	Tot Ext MV Exo
1554	P40616	ADP-ribosylation factor-like protein 1	20.4	400	ARL1	x	x	Tot Ext MV Exo
1555	P36404	ADP-ribosylation factor-like protein 2	20.9	402	ARL2	x	x	Tot Ext MV Exo
1556	P36405	ADP-ribosylation factor-like protein 3	20.4	403	ARL3	x	x	Tot Ext MV Exo
1557	Q15041	ADP-ribosylation factor-like protein 6-interacting protein 1	23.3	23204	ARL6IP1	x	x	Tot Ext MV Exo
1558	Q66PJ3-1	ADP-ribosylation factor-like protein 6-interacting protein 4	44.9	51329	ARL6IP4		x	Tot Ext MV Exo
1559	O75915	PRA1 family protein 3	21.6	10550	ARL6IP5	x	x	Tot Ext MV Exo
1560	Q96BM9	ADP-ribosylation factor-like protein 8A	21.4	127829	ARL8A	x	x	Tot Ext MV Exo
1561	Q9NVJ2	ADP-ribosylation factor-like protein 8B	21.5	55207	ARL8B	x	x	Tot Ext MV Exo
1562	Q92747	Actin-related protein 2/3 complex subunit 1A	41.5	10552	ARPC1A	x	x	Tot Ext MV Exo
1563	O15143	Actin-related protein 2/3 complex subunit 1B	40.9	10095	ARPC1B	x	x	Tot Ext MV Exo
1564	O15144	Actin-related protein 2/3 complex subunit 2	34.3	10109	ARPC2	x	x	Tot Ext MV Exo
1565	O15145	Actin-related protein 2/3 complex subunit 3	20.5	10094	ARPC3	x	x	Tot Ext MV Exo
1566	P59998	Actin-related protein 2/3 complex subunit 4	19.7	10093	ARPC4	x	x	Tot Ext MV Exo
1567	O15511-1	Actin-related protein 2/3 complex subunit 5	16.3	10092	ARPC5	x	x	Tot Ext MV Exo
1568	Q9BPX5	actin-related protein 2/3 complex subunit 5-like protein	16.9	81873	ARPC5L	x	x	Tot Ext MV Exo
1569	P36575	Arrestin-C	42.8	407	ARR3	x	x	Tot Ext MV Exo
1570	P49407-1	Beta-arrestin-1	47	408	ARRB1	x	x	Tot Ext MV Exo
1571	P32121	Beta-arrestin-2	46.1	409	ARRB2		x	Tot Ext MV Exo
1572	O43150-1	Arf-GAP with SH3 domain, ANK repeat and PH domain-containing protein 2	111.6	8853	ASAP2	x	x	Tot Ext MV Exo
1573	Q8N3C0	Activating signal cointegrator 1 complex subunit 3	251.3	10973	ASCC3	x	x	Tot Ext MV Exo
1574	Q9Y294	Histone chaperone ASF1A	23	25842	ASF1A		x	Tot Ext MV Exo
1575	Q9NVP2	Histone chaperone ASF1B	22.4	55723	ASF1B		x	Tot Ext MV Exo
1576	P04424	argininosuccinate lyase	51.6	435	ASL	x	x	Tot Ext MV Exo
1577	O95671-1	N-acetylserotonin O-methyltransferase-like protein	68.8	8623	ASMTL	x	x	Tot Ext MV Exo
1578	O43681	ATPase ASNA1	38.8	439	ASNA1	x	x	Tot Ext MV Exo
1579	P08243-1	Asparagine synthetase [glutamine-hydrolyzing]	64.3	440	ASNS	x	x	Tot Ext MV Exo
1580	Q9NT62	ubiquitin-like-conjugating enzyme ATG3	35.8	64422	ATG3	x	x	Tot Ext MV Exo
1581	Q9Y4P1-1	Cysteine protease ATG4B	44.3	23192	ATG4B	x	x	Tot Ext MV Exo
1582	Q9H1Y0-1	Autophagy protein 5	32.4	9474	ATG5		x	Tot Ext MV Exo
1583	O95352	Ubiquitin-like modifier-activating enzyme ATG7	77.9	10533	ATG7	x	x	Tot Ext MV Exo
1584	Q7Z3C6	autophagy-related protein 9A	94.4	79065	ATG9A	x	x	Tot Ext MV Exo
1585	P31939	bifunctional purine biosynthesis protein purH	64.6	471	ATIC	x	x	Tot Ext MV Exo
1586	Q6DD88	Atlastin-3	60.5	25923	ATL3	x	x	Tot Ext MV Exo
1587	Q9Y2G3	Probable phospholipid-transporting ATPase IF	134.1	23200	ATP11B		x	Tot Ext MV Exo
1588	Q9H7F0-1	probable cation-transporting ATPase 13A3	138	79572	ATP13A3	x	x	Tot Ext MV Exo
1589	P05023	Sodium/potassium-transporting ATPase subunit alpha-1	112.8	476	ATP1A1	x	x	Tot Ext MV Exo
1590	P50993	Sodium/potassium-transporting ATPase subunit alpha-2	112.2	477	ATP1A2	x	x	Tot Ext MV Exo
1591	P54709	sodium/potassium-transporting ATPase subunit beta-3	31.5	483	ATP1B3	x	x	Tot Ext MV Exo
1592	P16615	Sarcoplasmic/endoplasmic reticulum calcium ATPase 2	114.7	488	ATP2A2	x	x	Tot Ext MV Exo
1593	Q93084	Sarcoplasmic/endoplasmic reticulum calcium atpase 3	113.9	489	ATP2A3	x	x	Tot Ext MV Exo
1594	P20020	Plasma membrane calcium-transporting ATPase 1	138.7	490	ATP2B1	x	x	Tot Ext MV Exo
1595	P23634-1	Plasma membrane calcium-transporting ATPase 4	137.8	493	ATP2B4	x	x	Tot Ext MV Exo
1596	P25705-1	ATP synthase subunit alpha, mitochondrial	59.7	498	ATP5A1	x	x	Tot Ext MV Exo
1597	P06576	ATP synthase subunit beta, mitochondrial	56.5	506	ATP5B	x	x	Tot Ext MV Exo
1598	P36542-1	ATP synthase subunit gamma, mitochondrial	33	509	ATP5C1	x	x	Tot Ext MV Exo
1599	P30049	ATP synthase subunit delta, mitochondrial	17.5	513	ATP5D	x	x	Tot Ext MV Exo
1600	P24539	ATP synthase F(0) complex subunit B1, mitochondrial	28.9	515	ATP5F1		x	Tot Ext MV Exo
1601	O75947-1	ATP synthase subunit d, mitochondrial	18.5	10476	ATP5H	x	x	Tot Ext MV Exo
1602	P48047	ATP synthase subunit O, mitochondrial	23.3	539	ATP5O	x	x	Tot Ext MV Exo
1603	O75787	Renin receptor	39	10159	ATP6AP2	x	x	Tot Ext MV Exo
1604	Q9Y487	V-type proton ATPase 116 kDa subunit a isoform 2	98	23545	ATP6V0A2	x	x	Tot Ext MV Exo
1605	P61421	V-type proton ATPase subunit d 1	40.3	9114	ATP6V0D1	x	x	Tot Ext MV Exo
1606	P38606	V-type proton ATPase catalytic subunit A	68.3	523	ATP6V1A	x	x	Tot Ext MV Exo
1607	P21281	V-type proton ATPase subunit B, brain isoform	56.5	526	ATP6V1B2	x	x	Tot Ext MV Exo
1608	P21283	V-type proton ATPase subunit C 1	43.9	528	ATP6V1C1	x	x	Tot Ext MV Exo
1609	Q9Y5K8	V-type proton ATPase subunit D	28.2	51382	ATP6V1D	x	x	Tot Ext MV Exo
1610	P36543	V-type proton ATPase subunit E 1	26.1	529	ATP6V1E1	x	x	Tot Ext MV Exo
1611	Q9UI12-1	V-type proton ATPase subunit H	55.8	51606	ATP6V1H	x	x	Tot Ext MV Exo
1612	Q9Y2Q0	Phospholipid-transporting ATPase IA	131.3	10396	ATP8A1	x	x	Tot Ext MV Exo
1613	Q9UBB4-1	Ataxin-10	53.5	25814	ATXN10	x	x	Tot Ext MV Exo
1614	P25311	Zinc-alpha-2-glycoprotein	34.2	563	AZGP1	x	x	Tot Ext MV Exo
1615	P20160	Azurocidin	26.9	566	AZU1	x	x	Tot Ext MV Exo
1616	O94766	Galactosylgalactosylxylosylprotein 3-beta-glucuronosyltransferase 3	37.1	26229	B3GAT3	x	x	Tot Ext MV Exo
1617	P15291	Beta-1,4-galactosyltransferase 1	43.9	2683	B4GALT1	x	x	Tot Ext MV Exo
1618	O95816	BAG family molecular chaperone regulator 2	23.8	9532	BAG2	x	x	Tot Ext MV Exo
1619	P46379-1	Large proline-rich protein BAG6	119.3	7917	BAG6	x	x	Tot Ext MV Exo
1620	P80723	Brain acid soluble protein 1	22.7	10409	BASP1	x	x	Tot Ext MV Exo
1621	Q07812	Apoptosis regulator BAX	21.2	581	BAX	x	x	Tot Ext MV Exo
1622	Q9UIG0	Tyrosine-protein kinase BAZ1B	170.8	9031	BAZ1B	x	x	Tot Ext MV Exo
1623	P51572	B-cell receptor-associated protein 31	28	10134	BCAP31	x	x	Tot Ext MV Exo
1624	O75934	Pre-mRNA-splicing factor spf27	26.1	10286	BCAS2	x	x	Tot Ext MV Exo
1625	P54687	Branched-chain-amino-acid aminotransferase, cytosolic	42.9	586	BCAT1	x	x	Tot Ext MV Exo
1626	Q9P287	BRCA2 and CDKN1A-interacting protein	36	56647	BCCIP	x	x	Tot Ext MV Exo
1627	Q9BUT1-1	3-hydroxybutyrate dehydrogenase type 2	26.7	56898	BDH2	x	x	Tot Ext MV Exo
1628	Q9UBW5-1	Bridging integrator 2	61.8	51411	BIN2	x	x	Tot Ext MV Exo
1629	Q13867	bleomycin hydrolase	52.5	642	BLMH	x	x	Tot Ext MV Exo
1630	P53004	Biliverdin reductase A	33.4	644	BLVRA	x	x	Tot Ext MV Exo
1631	P30043	flavin reductase (NADPH)	22.1	645	BLVRB	x	x	Tot Ext MV Exo
1632	Q14137	Ribosome biogenesis protein BOP1	83.6	23246	BOP1	x	x	Tot Ext MV Exo
1633	P07738	Bisphosphoglycerate mutase	30	669	BPGM	x	x	Tot Ext MV Exo
1634	O95861-1	3'(2'),5'-bisphosphate nucleotidase 1	33.4	10380	BPNT1	x	x	Tot Ext MV Exo
1635	Q6PJG6-1	BRCA1-associated ATM activator 1	88.1	221927	BRAT1	x	x	Tot Ext MV Exo
1636	P46736	Lys-63-specific deubiquitinase BRCC36	36	79184	BRCC3		x	Tot Ext MV Exo
1637	Q9NXR7-2	BRISC and BRCA1-A complex member 2	43.5	9577	BRE; BABAM2			Tot Ext MV Exo
1638	Q8WY22	BRI3-binding protein	27.8	140707	BRI3BP	x	x	Tot Ext MV Exo
1639	Q8TDN6	Ribosome biogenesis protein BRX1 homolog	41.4	55299	BRIX1	x	x	Tot Ext MV Exo
1640	Q5VW32	BRO1 domain-containing protein BROX	46.4	148362	BROX	x	x	Tot Ext MV Exo
1641	P35613	Basigin	42.2	682	BSG	x	x	Tot Ext MV Exo
1642	Q10589	bone marrow stromal antigen 2	19.8	684	BST2	x	x	Tot Ext MV Exo
1643	P20290-1	transcription factor BTF3	22.2	689	BTF3	x	x	Tot Ext MV Exo
1644	O43684	Mitotic checkpoint protein BUB3	37.1	9184	BUB3	x	x	Tot Ext MV Exo
1645	P41223	Protein BUD31 homolog	17	8896	BUD31		x	Tot Ext MV Exo
1646	Q13895	Bystin	49.6	705	BYSL		x	Tot Ext MV Exo
1647	Q7L1Q6-1	Basic leucine zipper and W2 domain-containing protein 1	48	9689	BZW1	x	x	Tot Ext MV Exo
1648	Q9Y6E2	Basic leucine zipper and W2 domain-containing protein 2	48.1	28969	BZW2	x	x	Tot Ext MV Exo
1649	O00193	Small acidic protein	20.3	10944	C11orf58		x	Tot Ext MV Exo
1650	Q53FT3	Protein Hikeshi	21.6	51501	C11orf73; HIKESHI			Tot Ext MV Exo
1651	Q9HB07	UPF0160 protein MYG1, mitochondrial	42.4	60314	C12orf10	x	x	Tot Ext MV Exo
1652	Q9NQ88	Fructose-2,6-bisphosphatase TIGAR	30	57103	C12orf5; TIGAR			Tot Ext MV Exo
1653	Q9Y224	UPF0568 protein C14orf166	28.1	51637	C14orf166; RTRAF			Tot Ext MV Exo
1654	Q6UWD8	Transmembrane protein C16orf54	24.3	283897; 105369277	C16orf54; LOC101929877; LOC102725225; LOC105369277			Tot Ext MV Exo
1655	Q7Z3J2-1	UPF0505 protein C16orf62	109.5	57020	C16orf62	x	x	Tot Ext MV Exo
1656	Q9Y6A4	Cilia- and flagella-associated protein 20	22.8	29105	C16orf80; CFAP20			Tot Ext MV Exo
1657	Q96DM3	Uncharacterized protein C18orf8	74.9	29919	C18orf8; WDR98			Tot Ext MV Exo
1658	Q969H8	Myeloid-derived growth factor	18.8	56005	C19orf10; MYDGF			Tot Ext MV Exo
1659	Q9BQ61	Uncharacterized protein C19orf43	18.4	79002	C19orf43; TRIR			Tot Ext MV Exo
1660	Q9NWV4	UPF0587 protein C1orf123	18	54987	C1orf123		x	Tot Ext MV Exo
1661	Q5T750	Skin-specific protein 32	26.2	100129271	C1orf68		x	Tot Ext MV Exo
1662	Q07021	Complement component 1 Q subcomponent-binding protein, mitochondrial	31.3	708	C1QBP	x	x	Tot Ext MV Exo
1663	Q9GZN8	UPF0687 protein C20orf27	19.3	54976	C20orf27	x	x	Tot Ext MV Exo
1664	Q9Y3I0	tRNA-splicing ligase RtcB homolog	55.2	51493	C22orf28; RTCB			Tot Ext MV Exo
1665	Q86YS7-1	C2 domain-containing protein 5	110.4	9847	C2CD5; KIAA0528			Tot Ext MV Exo
1666	P01024	Complement C3	187	718	C3	x	x	Tot Ext MV Exo
1667	Q6ZMU1	Putative protein C3P1	40.2	388503	C3P1			Tot Ext MV Exo
1668	P0C0L4-1	Complement C4-A	192.7	720; 721	C4A; C4B			Tot Ext MV Exo
1669	P01031	Complement C5	188.2	727	C5	x	x	Tot Ext MV Exo
1670	O43598-1	2'-deoxynucleoside 5'-phosphate N-hydrolase 1	19.1	10591	C6orf108; DNPH1			Tot Ext MV Exo
1671	Q9H993	protein-glutamate O-methyltransferase	51.1	79624	C6orf211; ARMT1			Tot Ext MV Exo
1672	Q5T6V5	queuosine salvage protein	39	84267	C9orf64	x	x	Tot Ext MV Exo
1673	Q9Y376	Calcium-binding protein 39	39.8	51719	CAB39	x	x	Tot Ext MV Exo
1674	Q9H9S4	Calcium-binding protein 39-like	39.1	81617	CAB39L	x	x	Tot Ext MV Exo
1675	Q9HB71	Calcyclin-binding protein	26.2	27101	CACYBP	x	x	Tot Ext MV Exo
1676	P27708	CAD protein	242.8	790	CAD	x	x	Tot Ext MV Exo
1677	P62158	Calmodulin	16.8	808; 805; 801	CALM3; CALM2; CALM1			Tot Ext MV Exo
1678	P27797	Calreticulin	48.1	811	CALR	x	x	Tot Ext MV Exo
1679	Q14012	calcium/calmodulin-dependent protein kinase type 1	41.3	8536	CAMK1		x	Tot Ext MV Exo
1680	Q13557	Calcium/calmodulin-dependent protein kinase type II subunit delta	56.3	817	CAMK2D	x	x	Tot Ext MV Exo
1681	Q86VP6-1	cullin-associated nedd8-dissociated protein 1	136.3	55832	CAND1	x	x	Tot Ext MV Exo
1682	P27824	Calnexin	67.5	821	CANX	x	x	Tot Ext MV Exo
1683	Q01518-1	adenylyl cyclase-associated protein 1	51.9	10487	CAP1	x	x	Tot Ext MV Exo
1684	Q01518-2	Isoform 2 of Adenylyl cyclase-associated protein 1	51.8	10487	CAP1	x	x	Tot Ext MV Exo
1685	P40121	Macrophage-capping protein	38.5	822	CAPG	x	x	Tot Ext MV Exo
1686	P07384	Calpain-1 catalytic subunit	81.8	823	CAPN1	x	x	Tot Ext MV Exo
1687	P17655-1	Calpain-2 catalytic subunit	79.9	824	CAPN2	x	x	Tot Ext MV Exo
1688	Q9Y6W3	Calpain-7	92.6	23473	CAPN7	x	x	Tot Ext MV Exo
1689	P04632	Calpain small subunit 1	28.3	826	CAPNS1	x	x	Tot Ext MV Exo
1690	Q14444-1	Caprin-1	78.3	4076	CAPRIN1	x	x	Tot Ext MV Exo
1691	P52907	F-actin-capping protein subunit alpha-1	32.9	829	CAPZA1	x	x	Tot Ext MV Exo
1692	P47755	F-actin-capping protein subunit alpha-2	32.9	830	CAPZA2	x	x	Tot Ext MV Exo
1693	P47756-2	Isoform 2 of F-actin-capping protein subunit beta	30.6	832	CAPZB	x	x	Tot Ext MV Exo
1694	Q9Y2V2	Calcium-regulated heat-stable protein 1	15.9	23589	CARHSP1	x	x	Tot Ext MV Exo
1695	Q86X55	Histone-arginine methyltransferase CARM1	65.8	10498	CARM1	x	x	Tot Ext MV Exo
1696	P49589-3	Isoform 3 of Cysteine--tRNA ligase, cytoplasmic	94.6	833	CARS	x	x	Tot Ext MV Exo
1697	Q6P4E1	Protein CASC4	48.8	113201	CASC4	x	x	Tot Ext MV Exo
1698	P31944	Caspase-14	27.7	23581	CASP14	x	x	Tot Ext MV Exo
1699	P04040	catalase	59.7	847	CAT	x	x	Tot Ext MV Exo
1700	Q03135	Caveolin-1	20.5	857	CAV1	x	x	Tot Ext MV Exo
1701	P22681	E3 ubiquitin-protein ligase CBL	99.6	867	CBL	x	x	Tot Ext MV Exo
1702	Q13191-1	E3 ubiquitin-protein ligase CBL-B	109.4	868	CBLB		x	Tot Ext MV Exo
1703	P16152	Carbonyl reductase [NADPH] 1	30.4	873; 54093	CBR1; SETD4			Tot Ext MV Exo
1704	O75828	Carbonyl reductase [NADPH] 3	30.8	874	CBR3	x	x	Tot Ext MV Exo
1705	Q13185	chromobox protein homolog 3	20.8	11335; 90416	CBX3; C15orf57; CCDC32			Tot Ext MV Exo
1706	P45973	chromobox protein homolog 5	22.2	23468	CBX5	x	x	Tot Ext MV Exo
1707	Q6P1N0	Coiled-coil and C2 domain-containing protein 1A	104	54862	CC2D1A	x	x	Tot Ext MV Exo
1708	Q8IX12	Cell division cycle and apoptosis regulator protein 1	132.7	55749	CCAR1	x	x	Tot Ext MV Exo
1709	Q8N163-1	Cell cycle and apoptosis regulator protein 2	102.8	57805	CCAR2; KIAA1967			Tot Ext MV Exo
1710	Q6YP21	Kynurenine--oxoglutarate transaminase 3	51.4	56267	CCBL2; KYAT3			Tot Ext MV Exo
1711	O60826	Coiled-coil domain-containing protein 22	70.7	28952	CCDC22	x	x	Tot Ext MV Exo
1712	Q16204	coiled-coil domain-containing protein 6	53.3	8030	CCDC6	x	x	Tot Ext MV Exo
1713	Q9BSQ5-1	Cerebral cavernous malformations 2 protein	48.8	83605	CCM2	x	x	Tot Ext MV Exo
1714	Q8ND76	cyclin-Y	39.3	219771	CCNY	x	x	Tot Ext MV Exo
1715	P32246	C-C chemokine receptor type 1	41.1	1230	CCR1		x	Tot Ext MV Exo
1716	P51681	C-C chemokine receptor type 5	40.5	1234	CCR5	x	x	Tot Ext MV Exo
1717	P78371-1	T-complex protein 1 subunit beta	57.5	10576	CCT2	x	x	Tot Ext MV Exo
1718	P49368-1	T-complex protein 1 subunit gamma	60.5	7203	CCT3	x	x	Tot Ext MV Exo
1719	P50991	T-complex protein 1 subunit delta	57.9	10575	CCT4	x	x	Tot Ext MV Exo
1720	P48643	T-complex protein 1 subunit epsilon	59.6	22948	CCT5	x	x	Tot Ext MV Exo
1721	P40227-1	T-complex protein 1 subunit zeta	58	908	CCT6A	x	x	Tot Ext MV Exo
1722	Q92526-1	T-complex protein 1 subunit zeta-2	57.8	10693	CCT6B	x	x	Tot Ext MV Exo
1723	Q99832	T-complex protein 1 subunit eta	59.3	10574	CCT7	x	x	Tot Ext MV Exo
1724	P50990	T-complex protein 1 subunit theta	59.6	10694	CCT8	x	x	Tot Ext MV Exo
1725	P86790	Vacuolar fusion protein CCZ1 homolog B	55.8	51622; 221960	CCZ1; CCZ1B			Tot Ext MV Exo
1726	Q93033	immunoglobulin superfamily member 2	115	9398	CD101	x	x	Tot Ext MV Exo
1727	Q6YHK3-1	CD109 antigen	161.6	135228	CD109	x	x	Tot Ext MV Exo
1728	Q04900	Sialomucin core protein 24	20.9	8763	CD164	x	x	Tot Ext MV Exo
1729	P06729	T-cell surface antigen CD2	39.4	914	CD2	x	x	Tot Ext MV Exo
1730	P41217	OX-2 membrane glycoprotein	31.2	4345	CD200	x	x	Tot Ext MV Exo
1731	Q15762	CD226 antigen	38.6	10666	CD226	x	x	Tot Ext MV Exo
1732	Q9BZW8-2	Isoform 2 of Natural killer cell receptor 2B4	41.1	51744	CD244			Tot Ext MV Exo
1733	P20963-1	T-cell surface glycoprotein CD3 zeta chain	18.7	919	CD247	x	x	Tot Ext MV Exo
1734	Q9Y5K6	CD2-associated protein	71.4	23607	CD2AP	x	x	Tot Ext MV Exo
1735	Q9UGN4-1	CMRF35-like molecule 8	33.2	11314	CD300A	x	x	Tot Ext MV Exo
1736	P11049-1	Leukocyte antigen CD37	31.7	951	CD37	x	x	Tot Ext MV Exo
1737	P28907	ADP-ribosyl cyclase/cyclic ADP-ribose hydrolase 1	34.3	952	CD38	x	x	Tot Ext MV Exo
1738	P04234	T-cell surface glycoprotein CD3 delta chain	18.9	915	CD3D	x	x	Tot Ext MV Exo
1739	P07766	T-cell surface glycoprotein CD3 epsilon chain	23.1	916	CD3E	x	x	Tot Ext MV Exo
1740	P09693	T-cell surface glycoprotein CD3 gamma chain	20.5	917	CD3G	x	x	Tot Ext MV Exo
1741	P01730	T-cell surface glycoprotein CD4	51.1	920	CD4	x	x	Tot Ext MV Exo
1742	P16070-8	Isoform 8 of CD44 antigen	74.3	960	CD44	x	x	Tot Ext MV Exo
1743	Q08722	Leukocyte surface antigen CD47	35.2	961	CD47	x	x	Tot Ext MV Exo
1744	P09326	CD48 antigen	27.7	962	CD48	x	x	Tot Ext MV Exo
1745	P06127	T-cell surface glycoprotein CD5	54.5	921	CD5	x	x	Tot Ext MV Exo
1746	P08174-1	Complement decay-accelerating factor	41.4	1604	CD55	x	x	Tot Ext MV Exo
1747	P19256	Lymphocyte function-associated antigen 3	28.1	965	CD58	x	x	Tot Ext MV Exo
1748	P13987	CD59 glycoprotein	14.2	966	CD59	x	x	Tot Ext MV Exo
1749	P30203-1	T-cell differentiation antigen CD6	71.8	923	CD6	x	x	Tot Ext MV Exo
1750	P08962	CD63 antigen	25.6	967	CD63	x	x	Tot Ext MV Exo
1751	P09564	T-cell antigen CD7	25.4	924	CD7		x	Tot Ext MV Exo
1752	P32970	CD70 antigen	21.1	970	CD70	x	x	Tot Ext MV Exo
1753	P04233-2	Isoform 2 of HLA class II histocompatibility antigen gamma chain	26.4	972	CD74	x	x	Tot Ext MV Exo
1754	P60033	CD81 antigen	25.8	975	CD81	x	x	Tot Ext MV Exo
1755	P27701	CD82 antigen	29.6	3732	CD82	x	x	Tot Ext MV Exo
1756	P01732-1	T-cell surface glycoprotein CD8 alpha chain	25.7	925	CD8A	x	x	Tot Ext MV Exo
1757	P40200-1	T-cell surface protein tactile	65.6	10225	CD96		x	Tot Ext MV Exo
1758	P48960-1	CD97 antigen	91.8	976	CD97; ADGRE5			Tot Ext MV Exo
1759	Q16543	Hsp90 co-chaperone Cdc37	44.4	11140	CDC37	x	x	Tot Ext MV Exo
1760	P60953	Cell division control protein 42 homolog	21.2	998	CDC42	x	x	Tot Ext MV Exo
1761	Q99459	Cell division cycle 5-like protein	92.2	988	CDC5L	x	x	Tot Ext MV Exo
1762	O14735	CDP-diacylglycerol--inositol 3-phosphatidyltransferase	23.5	10423	CDIPT	x	x	Tot Ext MV Exo
1763	P06493	Cyclin-dependent kinase 1	34.1	983	CDK1	x	x	Tot Ext MV Exo
1764	P24941-1	cyclin-dependent kinase 2	33.9	1017	CDK2	x	x	Tot Ext MV Exo
1765	Q00534	Cyclin-dependent kinase 6	36.9	1021	CDK6	x	x	Tot Ext MV Exo
1766	Q15517	corneodesmosin	51.5	1041	CDSN	x	x	Tot Ext MV Exo
1767	P13688-1	Carcinoembryonic antigen-related cell adhesion molecule 1	57.5	634	CEACAM1	x	x	Tot Ext MV Exo
1768	Q92879	CUGBP Elav-like family member 1	52	10658	CELF1	x	x	Tot Ext MV Exo
1769	O95319-2	Isoform 2 of CUGBP Elav-like family member 2	52.2	10659	CELF2	x	x	Tot Ext MV Exo
1770	Q53EZ4-1	Centrosomal protein of 55 kDa	54.1	55165	CEP55	x	x	Tot Ext MV Exo
1771	P23528	Cofilin-1	18.5	1072	CFL1	x	x	Tot Ext MV Exo
1772	Q14839	Chromodomain-helicase-DNA-binding protein 4	217.9	1108	CHD4	x	x	Tot Ext MV Exo
1773	Q8IWX8	Calcium homeostasis endoplasmic reticulum protein	103.6	10523	CHERP		x	Tot Ext MV Exo
1774	Q9HD42-1	Charged multivesicular body protein 1a	21.7	5119	CHMP1A	x	x	Tot Ext MV Exo
1775	O43633	charged multivesicular body protein 2a	25.1	27243	CHMP2A	x	x	Tot Ext MV Exo
1776	Q9BY43	Charged multivesicular body protein 4a	25.1	29082	CHMP4A	x	x	Tot Ext MV Exo
1777	Q9H444	Charged multivesicular body protein 4b	24.9	128866	CHMP4B	x	x	Tot Ext MV Exo
1778	Q9NZZ3	Charged multivesicular body protein 5	24.6	51510	CHMP5	x	x	Tot Ext MV Exo
1779	Q96FZ7	charged multivesicular body protein 6	23.5	79643	CHMP6	x	x	Tot Ext MV Exo
1780	Q8WUX9	Charged multivesicular body protein 7	50.9	91782	CHMP7		x	Tot Ext MV Exo
1781	Q9UHD1	cysteine and histidine-rich domain-containing protein 1	37.5	26973	CHORDC1	x	x	Tot Ext MV Exo
1782	Q99653	Calcineurin B homologous protein 1	22.4	11261	CHP1	x	x	Tot Ext MV Exo
1783	Q9NPF2-1	Carbohydrate sulfotransferase 11	41.5	50515	CHST11		x	Tot Ext MV Exo
1784	O15111	Inhibitor of nuclear factor kappa-B kinase subunit alpha	84.6	1147	CHUK	x	x	Tot Ext MV Exo
1785	O76071	Probable cytosolic iron-sulfur protein assembly protein Ciao1	37.8	9391	CIAO1	x	x	Tot Ext MV Exo
1786	Q6FI81-1	Anamorsin	33.6	57019	CIAPIN1		x	Tot Ext MV Exo
1787	Q99828	calcium and integrin-binding protein 1	21.7	10519	CIB1	x	x	Tot Ext MV Exo
1788	Q14008	Cytoskeleton-associated protein 5	225.4	9793	CKAP5	x	x	Tot Ext MV Exo
1789	Q7Z460-1	CLIP-associating protein 1	169.3	23332	CLASP1	x	x	Tot Ext MV Exo
1790	O75122-3	Isoform 3 of CLIP-associating protein 2	165.8	23122	CLASP2	x	x	Tot Ext MV Exo
1791	Q9NY35-1	Claudin domain-containing protein 1	28.6	56650	CLDND1	x	x	Tot Ext MV Exo
1792	P05452	Tetranectin	22.5	7123	CLEC3B	x	x	Tot Ext MV Exo
1793	O00299	chloride intracellular channel protein 1	26.9	1192	CLIC1	x	x	Tot Ext MV Exo
1794	O95833	Chloride intracellular channel protein 3	26.6	9022	CLIC3	x	x	Tot Ext MV Exo
1795	Q9Y696	Chloride intracellular channel protein 4	28.8	25932	CLIC4	x	x	Tot Ext MV Exo
1796	Q9NZA1-1	Chloride intracellular channel protein 5	46.5	53405	CLIC5	x	x	Tot Ext MV Exo
1797	Q14677-1	Clathrin interactor 1	68.2	9685	CLINT1	x	x	Tot Ext MV Exo
1798	P30622-1	Isoform 2 of CAP-Gly domain-containing linker protein 1	160.9	6249	CLIP1		x	Tot Ext MV Exo
1799	P54105	Methylosome subunit pICln	26.2	1207	CLNS1A	x	x	Tot Ext MV Exo
1800	O96005-1	Cleft lip and palate transmembrane protein 1	76	1209	CLPTM1		x	Tot Ext MV Exo
1801	P09496-2	Isoform Non-brain of Clathrin light chain A	23.6	1211	CLTA	x	x	Tot Ext MV Exo
1802	Q00610-1	Clathrin heavy chain 1	191.5	1213	CLTC	x	x	Tot Ext MV Exo
1803	O75153	Clustered mitochondria protein homolog	146.6	23277	CLUH; KIAA0664			Tot Ext MV Exo
1804	Q8NFW8	N-acylneuraminate cytidylyltransferase	48.3	55907	CMAS		x	Tot Ext MV Exo
1805	P30085-1	UMP-CMP kinase	22.2	51727	CMPK1	x	x	Tot Ext MV Exo
1806	Q96MX0-1	CKLF-like MARVEL transmembrane domain-containing protein 3	19.7	123920	CMTM3		x	Tot Ext MV Exo
1807	Q9NX76	CKLF-like MARVEL transmembrane domain-containing protein 6	20.4	54918	CMTM6	x	x	Tot Ext MV Exo
1808	P62633-1	Cellular nucleic acid-binding protein	19.5	7555	CNBP		x	Tot Ext MV Exo
1809	Q96KP4	cytosolic non-specific dipeptidase	52.8	55748	CNDP2	x	x	Tot Ext MV Exo
1810	Q99439	Calponin-2	33.7	1265	CNN2	x	x	Tot Ext MV Exo
1811	Q8NE01	Metal transporter CNNM3	76.1	26505	CNNM3	x	x	Tot Ext MV Exo
1812	Q6P4Q7	metal transporter CNNM4	86.6	26504	CNNM4	x	x	Tot Ext MV Exo
1813	A5YKK6	CCR4-NOT transcription complex subunit 1	266.8	23019	CNOT1	x	x	Tot Ext MV Exo
1814	Q9UIV1-1	CCR4-NOT transcription complex subunit 7	32.7	29883	CNOT7	x	x	Tot Ext MV Exo
1815	P09543-1	2',3'-cyclic-nucleotide 3'-phosphodiesterase	47.5	1267	CNP	x	x	Tot Ext MV Exo
1816	Q9Y2B0	Protein canopy homolog 2	20.6	10330	CNPY2	x	x	Tot Ext MV Exo
1817	Q13057	Bifunctional coenzyme A synthase	62.3	80347	COASY	x	x	Tot Ext MV Exo
1818	Q8WTW3	conserved oligomeric Golgi complex subunit 1	108.9	9382	COG1	x	x	Tot Ext MV Exo
1819	Q9Y2V7-1	Conserved oligomeric Golgi complex subunit 6	73.2	57511	COG6	x	x	Tot Ext MV Exo
1820	Q9Y5P4-1	Collagen type IV alpha-3-binding protein	70.8	10087	COL4A3BP		x	Tot Ext MV Exo
1821	Q8NBJ5	Procollagen galactosyltransferase 1	71.6	79709	COLGALT1; GLT25D1			Tot Ext MV Exo
1822	Q8N668	COMM domain-containing protein 1	21.2	150684	COMMD1		x	Tot Ext MV Exo
1823	Q86X83	COMM domain-containing protein 2	22.7	51122	COMMD2		x	Tot Ext MV Exo
1824	Q9UBI1	COMM domain-containing protein 3	22.1	23412	COMMD3	x	x	Tot Ext MV Exo
1825	Q9H0A8-1	COMM domain-containing protein 4	21.8	54939	COMMD4		x	Tot Ext MV Exo
1826	Q9NX08	COMM domain-containing protein 8	21.1	54951	COMMD8		x	Tot Ext MV Exo
1827	Q9P000-1	COMM domain-containing protein 9	21.8	29099	COMMD9		x	Tot Ext MV Exo
1828	P21964-1	Catechol O-methyltransferase	30	1312	COMT	x	x	Tot Ext MV Exo
1829	P53621-1	coatomer subunit alpha	138.3	1314	COPA	x	x	Tot Ext MV Exo
1830	P53618	Coatomer subunit beta	107.1	1315	COPB1	x	x	Tot Ext MV Exo
1831	P35606	Coatomer subunit beta'	102.4	9276	COPB2	x	x	Tot Ext MV Exo
1832	O14579-1	coatomer subunit epsilon	34.5	11316	COPE	x	x	Tot Ext MV Exo
1833	Q9Y678	Coatomer subunit gamma-1	97.7	22820	COPG1	x	x	Tot Ext MV Exo
1834	Q9UBF2	Coatomer subunit gamma-2	97.6	26958	COPG2	x	x	Tot Ext MV Exo
1835	P61201-1	COP9 signalosome complex subunit 2	51.6	9318	COPS2	x	x	Tot Ext MV Exo
1836	Q9UNS2	COP9 signalosome complex subunit 3	47.8	8533	COPS3	x	x	Tot Ext MV Exo
1837	Q9BT78	COP9 signalosome complex subunit 4	46.2	51138	COPS4	x	x	Tot Ext MV Exo
1838	Q92905	COP9 signalosome complex subunit 5	37.6	10987	COPS5	x	x	Tot Ext MV Exo
1839	Q7L5N1	COP9 signalosome complex subunit 6	36.1	10980	COPS6	x	x	Tot Ext MV Exo
1840	Q9UBW8	COP9 signalosome complex subunit 7a	30.3	50813	COPS7A		x	Tot Ext MV Exo
1841	Q9H9Q2	COP9 signalosome complex subunit 7b	29.6	64708	COPS7B		x	Tot Ext MV Exo
1842	Q99627-1	COP9 signalosome complex subunit 8	23.2	10920	COPS8	x	x	Tot Ext MV Exo
1843	P61923	Coatomer subunit zeta-1	20.2	22818	COPZ1	x	x	Tot Ext MV Exo
1844	P31146	Coronin-1A	51	11151	CORO1A	x	x	Tot Ext MV Exo
1845	Q9BR76	Coronin-1B	54.2	57175	CORO1B	x	x	Tot Ext MV Exo
1846	Q9ULV4	coronin-1C	53.2	23603	CORO1C	x	x	Tot Ext MV Exo
1847	P57737	Coronin-7	100.5	79585	CORO7	x	x	Tot Ext MV Exo
1848	Q14019	coactosin-like protein	15.9	23406	COTL1	x	x	Tot Ext MV Exo
1849	P00403	Cytochrome c oxidase subunit 2	25.5	4513	COX2		x	Tot Ext MV Exo
1850	P13073	Cytochrome c oxidase subunit 4 isoform 1, mitochondrial	19.6	1327	COX4I1	x	x	Tot Ext MV Exo
1851	Q99829	Copine-1	59	8904	CPNE1	x	x	Tot Ext MV Exo
1852	O75131	Copine-3	60.1	8895	CPNE3	x	x	Tot Ext MV Exo
1853	P36551	Oxygen-dependent coproporphyrinogen-III oxidase, mitochondrial	50.1	1371	CPOX	x	x	Tot Ext MV Exo
1854	Q9BRF8-1	Serine/threonine-protein phosphatase CPPED1	35.5	55313	CPPED1		x	Tot Ext MV Exo
1855	Q10570	Cleavage and polyadenylation specificity factor subunit 1	160.8	29894	CPSF1	x	x	Tot Ext MV Exo
1856	Q9P2I0	Cleavage and polyadenylation specificity factor subunit 2	88.4	53981	CPSF2	x	x	Tot Ext MV Exo
1857	O95639	Cleavage and polyadenylation specificity factor subunit 4	30.2	10898	CPSF4		x	Tot Ext MV Exo
1858	Q16630	Cleavage and polyadenylation specificity factor subunit 6	59.2	11052	CPSF6	x	x	Tot Ext MV Exo
1859	Q8N684-1	Cleavage and polyadenylation specificity factor subunit 7	52	79869	CPSF7	x	x	Tot Ext MV Exo
1860	P46109	Crk-like protein	33.8	1399	CRKL	x	x	Tot Ext MV Exo
1861	Q8IUI8-2	Isoform 2 of Cytokine receptor-like factor 3	49.3	51379	CRLF3	x	x	Tot Ext MV Exo
1862	Q9BZJ0	Crooked neck-like protein 1	100.4	51340	CRNKL1	x	x	Tot Ext MV Exo
1863	Q5TZA2	Rootletin	228.4	9696	CROCC	x	x	Tot Ext MV Exo
1864	Q08257	Quinone oxidoreductase	35.2	1429	CRYZ	x	x	Tot Ext MV Exo
1865	O75390	citrate synthase, mitochondrial	51.7	1431	CS	x	x	Tot Ext MV Exo
1866	O75534	cold shock domain-containing protein E1	88.8	7812	CSDE1	x	x	Tot Ext MV Exo
1867	P55060-1	Exportin-2	110.3	1434	CSE1L	x	x	Tot Ext MV Exo
1868	P41240	tyrosine-protein kinase CSK	50.7	1445	CSK	x	x	Tot Ext MV Exo
1869	P48729-1	Casein kinase I isoform alpha	38.9	1452	CSNK1A1	x	x	Tot Ext MV Exo
1870	P68400	Casein kinase II subunit alpha	45.1	1457	CSNK2A1	x	x	Tot Ext MV Exo
1871	P19784	casein kinase II subunit alpha'	41.2	1459	CSNK2A2	x	x	Tot Ext MV Exo
1872	P67870	Casein kinase II subunit beta	24.9	1460	CSNK2B	x	x	Tot Ext MV Exo
1873	P21291	Cysteine and glycine-rich protein 1	20.6	1465	CSRP1	x	x	Tot Ext MV Exo
1874	P01040	Cystatin-A	11	1475	CSTA	x	x	Tot Ext MV Exo
1875	Q13363-1	C-terminal-binding protein 1	47.5	1487	CTBP1	x	x	Tot Ext MV Exo
1876	Q9GZU7-2	Isoform 2 of Carboxy-terminal domain RNA polymerase II polypeptide A small phosphatase 1	29.1	58190	CTDSP1	x	x	Tot Ext MV Exo
1877	P35221	Catenin alpha-1	100	1495	CTNNA1	x	x	Tot Ext MV Exo
1878	P17812	CTP synthase 1	66.6	1503	CTPS1	x	x	Tot Ext MV Exo
1879	P53634-1	Dipeptidyl peptidase 1	51.8	1075	CTSC	x	x	Tot Ext MV Exo
1880	P07339	Cathepsin D	44.5	1509	CTSD	x	x	Tot Ext MV Exo
1881	P25774-1	cathepsin S	37.5	1520	CTSS		x	Tot Ext MV Exo
1882	P56202	cathepsin W	42.1	1521	CTSW			Tot Ext MV Exo
1883	Q13616	Cullin-1	89.6	8454	CUL1	x	x	Tot Ext MV Exo
1884	Q13617-1	Cullin-2	86.9	8453	CUL2	x	x	Tot Ext MV Exo
1885	Q13618	Cullin-3	88.9	8452	CUL3	x	x	Tot Ext MV Exo
1886	Q13619-1	cullin-4A	87.6	8451	CUL4A	x	x	Tot Ext MV Exo
1887	Q13620-1	Isoform 2 of Cullin-4B	102.2	8450	CUL4B	x	x	Tot Ext MV Exo
1888	Q93034	Cullin-5	90.9	8065	CUL5	x	x	Tot Ext MV Exo
1889	Q69YN2-1	CWF19-like protein 1	60.6	55280	CWF19L1	x	x	Tot Ext MV Exo
1890	P49682-1	C-X-C chemokine receptor type 3	40.6	2833	CXCR3			Tot Ext MV Exo
1891	P61073	C-X-C chemokine receptor type 4	39.7	7852	CXCR4	x	x	Tot Ext MV Exo
1892	O43169	Cytochrome b5 type B	16.3	80777	CYB5B	x	x	Tot Ext MV Exo
1893	P00387	NADH-cytochrome b5 reductase 3	34.2	1727	CYB5R3	x	x	Tot Ext MV Exo
1894	P08574	Cytochrome c1, heme protein, mitochondrial	35.4	1537	CYC1	x	x	Tot Ext MV Exo
1895	Q7L576-1	cytoplasmic FMR1-interacting protein 1	145.1	23191	CYFIP1	x	x	Tot Ext MV Exo
1896	Q96F07-2	Isoform 2 of Cytoplasmic FMR1-interacting protein 2	145.6	26999	CYFIP2	x	x	Tot Ext MV Exo
1897	Q16850-1	lanosterol 14-alpha demethylase	56.8	1595	CYP51A1		x	Tot Ext MV Exo
1898	Q15438-1	Cytohesin-1	46.4	9267	CYTH1		x	Tot Ext MV Exo
1899	Q3LXA3	Triokinase/FMN cyclase	58.9	26007	DAK; TKFC			Tot Ext MV Exo
1900	P51398-1	28S ribosomal protein S29, mitochondrial	45.5	7818	DAP3		x	Tot Ext MV Exo
1901	Q9UIK4-1	Death-associated protein kinase 2	42.9	23604	DAPK2			Tot Ext MV Exo
1902	P14868	Aspartate--tRNA ligase, cytoplasmic	57.1	1615	DARS	x	x	Tot Ext MV Exo
1903	Q9UJU6-3	Isoform 3 of Drebrin-like protein	49	28988	DBNL	x	x	Tot Ext MV Exo
1904	P61962	DDB1- and CUL4-associated factor 7	38.9	10238	DCAF7	x	x	Tot Ext MV Exo
1905	P81605	Dermcidin	11.3	117159	DCD	x	x	Tot Ext MV Exo
1906	P27707	deoxycytidine kinase	30.5	1633	DCK	x	x	Tot Ext MV Exo
1907	Q96C86	M7GpppX diphosphatase	38.6	28960	DCPS		x	Tot Ext MV Exo
1908	Q14203	Dynactin subunit 1	141.6	1639	DCTN1	x	x	Tot Ext MV Exo
1909	Q13561-1	dynactin subunit 2	44.2	10540	DCTN2	x	x	Tot Ext MV Exo
1910	O75935	Dynactin subunit 3	21.1	11258	DCTN3	x	x	Tot Ext MV Exo
1911	Q9UJW0-1	Dynactin subunit 4	52.3	51164	DCTN4		x	Tot Ext MV Exo
1912	Q9BTE1	Dynactin subunit 5	20.1	84516	DCTN5	x	x	Tot Ext MV Exo
1913	Q9H773	dCTP pyrophosphatase 1	18.7	79077	DCTPP1	x	x	Tot Ext MV Exo
1914	Q96GG9	DCN1-like protein 1	30.1	54165	DCUN1D1		x	Tot Ext MV Exo
1915	Q7Z4W1	L-xylulose reductase	25.9	51181	DCXR	x	x	Tot Ext MV Exo
1916	O95865	N(G),N(G)-dimethylarginine dimethylaminohydrolase 2	29.6	23564	DDAH2	x	x	Tot Ext MV Exo
1917	Q16531	DNA damage-binding protein 1	126.9	1642	DDB1	x	x	Tot Ext MV Exo
1918	P39656	Dolichyl-diphosphooligosaccharide--protein glycosyltransferase 48 kDa subunit	50.8	1650	DDOST	x	x	Tot Ext MV Exo
1919	Q92499	ATP-dependent RNA helicase DDX1	82.4	1653	DDX1	x	x	Tot Ext MV Exo
1920	Q92841	Probable ATP-dependent RNA helicase DDX17	80.2	10521	DDX17	x	x	Tot Ext MV Exo
1921	Q9NVP1	ATP-dependent RNA helicase DDX18	75.4	8886	DDX18	x	x	Tot Ext MV Exo
1922	Q9NR30-1	Nucleolar RNA helicase 2	87.3	9188	DDX21	x	x	Tot Ext MV Exo
1923	Q9BUQ8	Probable ATP-dependent RNA helicase DDX23	95.5	9416	DDX23	x	x	Tot Ext MV Exo
1924	O00148	ATP-dependent RNA helicase DDX39A	49.1	10212	DDX39A	x	x	Tot Ext MV Exo
1925	Q13838-1	spliceosome RNA helicase DDX39B	49	7919	DDX39B	x	x	Tot Ext MV Exo
1926	O00571	ATP-dependent RNA helicase DDX3X	73.2	1654	DDX3X	x	x	Tot Ext MV Exo
1927	Q7L014	probable ATP-dependent RNA helicase DDX46	117.3	9879	DDX46	x	x	Tot Ext MV Exo
1928	P17844	probable ATP-dependent RNA helicase DDX5	69.1	1655	DDX5	x	x	Tot Ext MV Exo
1929	P26196	Probable ATP-dependent RNA helicase DDX6	54.4	1656	DDX6	x	x	Tot Ext MV Exo
1930	Q16698	2,4-dienoyl-CoA reductase, mitochondrial	36	1666	DECR1	x	x	Tot Ext MV Exo
1931	Q9H4E7	differentially expressed in FDCP 6 homolog	73.9	50619	DEF6	x	x	Tot Ext MV Exo
1932	P35659-1	Protein DEK	42.6	7913	DEK	x	x	Tot Ext MV Exo
1933	Q8IV53-1	DENN domain-containing protein 1C	87	79958	DENND1C		x	Tot Ext MV Exo
1934	Q9H6A0-1	DENN domain-containing protein 2D	53.6	79961	DENND2D		x	Tot Ext MV Exo
1935	O43583	density-regulated protein	22.1	8562	DENR	x	x	Tot Ext MV Exo
1936	Q9Y315	deoxyribose-phosphate aldolase	35.2	51071	DERA	x	x	Tot Ext MV Exo
1937	Q9BUN8	Derlin-1	28.8	79139	DERL1	x	x	Tot Ext MV Exo
1938	Q13574	Diacylglycerol kinase zeta	124.1	8525	DGKZ		x	Tot Ext MV Exo
1939	Q15392	Delta(24)-sterol reductase	60.1	1718	DHCR24	x	x	Tot Ext MV Exo
1940	P00374	dihydrofolate reductase	21.4	1719; 573971	DHFR; DHFRP1			Tot Ext MV Exo
1941	P49366-1	deoxyhypusine synthase	40.9	1725	DHPS		x	Tot Ext MV Exo
1942	Q9Y394	Dehydrogenase/reductase SDR family member 7	38.3	51635	DHRS7	x	x	Tot Ext MV Exo
1943	O43143	Pre-mRNA-splicing factor ATP-dependent RNA helicase DHX15	90.9	1665	DHX15	x	x	Tot Ext MV Exo
1944	O60231	Putative pre-mRNA-splicing factor ATP-dependent RNA helicase DHX16	119.2	8449	DHX16	x	x	Tot Ext MV Exo
1945	Q7Z478	ATP-dependent RNA helicase Dhx29	155.1	54505	DHX29		x	Tot Ext MV Exo
1946	Q08211	Atp-dependent rna helicase a	140.9	1660	DHX9	x	x	Tot Ext MV Exo
1947	Q9NR28-1	Diablo homolog, mitochondrial	27.1	56616	DIABLO		x	Tot Ext MV Exo
1948	O60610-1	Protein diaphanous homolog 1	141.3	1729	DIAPH1	x	x	Tot Ext MV Exo
1949	Q68CQ4	Digestive organ expansion factor homolog	87	27042	DIEXF		x	Tot Ext MV Exo
1950	Q9P265	Disco-interacting protein 2 homolog B	171.4	57609	DIP2B	x	x	Tot Ext MV Exo
1951	Q9Y2L1-1	exosome complex exonuclease RRP44	108.9	22894	DIS3	x	x	Tot Ext MV Exo
1952	O60832-1	H/ACA ribonucleoprotein complex subunit 4	57.6	1736	DKC1	x	x	Tot Ext MV Exo
1953	P09622	Dihydrolipoyl dehydrogenase, mitochondrial	54.1	1738	DLD	x	x	Tot Ext MV Exo
1954	P36957	Dihydrolipoyllysine-residue succinyltransferase component of 2-oxoglutarate dehydrogenase complex, mitochondrial	48.7	1743	DLST	x	x	Tot Ext MV Exo
1955	Q9UGM3-1	deleted in malignant brain tumors 1 protein	260.6	1755	DMBT1	x	x	Tot Ext MV Exo
1956	P31689-1	DnaJ homolog subfamily A member 1	44.8	3301	DNAJA1	x	x	Tot Ext MV Exo
1957	O60884	DnaJ homolog subfamily A member 2	45.7	10294	DNAJA2	x	x	Tot Ext MV Exo
1958	Q8WW22-1	DnaJ homolog subfamily A member 4	44.8	55466	DNAJA4		x	Tot Ext MV Exo
1959	P25685	dnaJ homolog subfamily B member 1	38	3337	DNAJB1	x	x	Tot Ext MV Exo
1960	Q9UBS4	DnaJ homolog subfamily B member 11	40.5	51726	DNAJB11	x	x	Tot Ext MV Exo
1961	Q9UDY4	DnaJ homolog subfamily B member 4	37.8	11080	DNAJB4		x	Tot Ext MV Exo
1962	O75190	DnaJ homolog subfamily B member 6	36.1	10049	DNAJB6	x	x	Tot Ext MV Exo
1963	O75165	DnaJ homolog subfamily C member 13	254.3	23317	DNAJC13	x	x	Tot Ext MV Exo
1964	Q13217	DnaJ homolog subfamily C member 3	57.5	5611	DNAJC3	x	x	Tot Ext MV Exo
1965	Q9H3Z4	DnaJ homolog subfamily C member 5	22.1	80331	DNAJC5	x	x	Tot Ext MV Exo
1966	Q99615-1	DnaJ homolog subfamily C member 7	56.4	7266	DNAJC7	x	x	Tot Ext MV Exo
1967	Q8WXX5	dnaJ homolog subfamily C member 9	29.9	23234	DNAJC9	x	x	Tot Ext MV Exo
1968	P50570-1	Dynamin-2	98	1785	DNM2	x	x	Tot Ext MV Exo
1969	P50570-4	Isoform 4 of Dynamin-2	97.9	1785	DNM2	x	x	Tot Ext MV Exo
1970	P26358-2	Isoform 2 of DNA (cytosine-5)-methyltransferase 1	184.7	1786	DNMT1	x	x	Tot Ext MV Exo
1971	Q9ULA0	Aspartyl aminopeptidase	52.4	23549	DNPEP	x	x	Tot Ext MV Exo
1972	Q96BY6-1	Dedicator of cytokinesis protein 10	249.4	55619	DOCK10	x	x	Tot Ext MV Exo
1973	Q5JSL3	dedicator of cytokinesis protein 11	237.5	139818	DOCK11	x	x	Tot Ext MV Exo
1974	Q92608-1	Dedicator of cytokinesis protein 2	211.8	1794	DOCK2	x	x	Tot Ext MV Exo
1975	Q9H7D0-1	dedicator of cytokinesis protein 5	215.2	80005	DOCK5	x	x	Tot Ext MV Exo
1976	Q96N67	Dedicator of cytokinesis protein 7	242.4	85440	DOCK7	x	x	Tot Ext MV Exo
1977	Q8NF50-1	Dedicator of cytokinesis protein 8	238.4	81704	DOCK8	x	x	Tot Ext MV Exo
1978	O60496	Docking protein 2	45.4	9046	DOK2	x	x	Tot Ext MV Exo
1979	O60762	Dolichol-phosphate mannosyltransferase subunit 1	29.6	8813	DPM1		x	Tot Ext MV Exo
1980	Q9NY33	dipeptidyl peptidase 3	82.5	10072	DPP3	x	x	Tot Ext MV Exo
1981	P27487	Dipeptidyl peptidase 4	88.2	1803	DPP4	x	x	Tot Ext MV Exo
1982	Q9UHL4	Dipeptidyl peptidase 2	54.3	29952	DPP7	x	x	Tot Ext MV Exo
1983	Q86TI2	Dipeptidyl peptidase 9	98.2	91039	DPP9	x	x	Tot Ext MV Exo
1984	Q12882-1	Dihydropyrimidine dehydrogenase [NADP(+)]	111.3	1806	DPYD		x	Tot Ext MV Exo
1985	Q16555-1	Dihydropyrimidinase-related protein 2	62.3	1808	DPYSL2	x	x	Tot Ext MV Exo
1986	Q01658	Protein Dr1	19.4	1810	DR1		x	Tot Ext MV Exo
1987	Q14919-1	Dr1-associated corepressor	22.3	10589	DRAP1		x	Tot Ext MV Exo
1988	Q9Y295	developmentally-regulated GTP-binding protein 1	40.5	4733	DRG1	x	x	Tot Ext MV Exo
1989	P55039	Developmentally-regulated GTP-binding protein 2	40.7	1819	DRG2	x	x	Tot Ext MV Exo
1990	Q08554-1	Desmocollin-1	99.9	1823	DSC1	x	x	Tot Ext MV Exo
1991	Q02413	Desmoglein-1	113.7	1828	DSG1	x	x	Tot Ext MV Exo
1992	P15924-1	Desmoplakin	331.6	1832	DSP	x	x	Tot Ext MV Exo
1993	P60981-1	Destrin	18.5	11034	DSTN	x	x	Tot Ext MV Exo
1994	Q8TDB6-1	E3 ubiquitin-protein ligase DTX3L	83.5	151636	DTX3L	x	x	Tot Ext MV Exo
1995	P23919	thymidylate kinase	23.8	1841	DTYMK	x	x	Tot Ext MV Exo
1996	P33316-3	Deoxyuridine 5'-triphosphate nucleotidohydrolase, mitochondrial	26.5	1854	DUT	x	x	Tot Ext MV Exo
1997	Q14204	Cytoplasmic dynein 1 heavy chain 1	532.1	1778	DYNC1H1	x	x	Tot Ext MV Exo
1998	Q13409-1	cytoplasmic dynein 1 intermediate chain 2	71.4	1781	DYNC1I2	x	x	Tot Ext MV Exo
[truncated: 1,832 more rows]
